# Supplementary material for: Initial genome sequencing and analysis of multiple myeloma
Source: Springer Nature journal article supplement (doi:10.1038/nature09837), 2011-03-01
Supplement: 41586_2011_BFnature09837_MOESM242_ESM.pdf [file 41586_2011_BFnature09837_MOESM242_ESM.pdf]

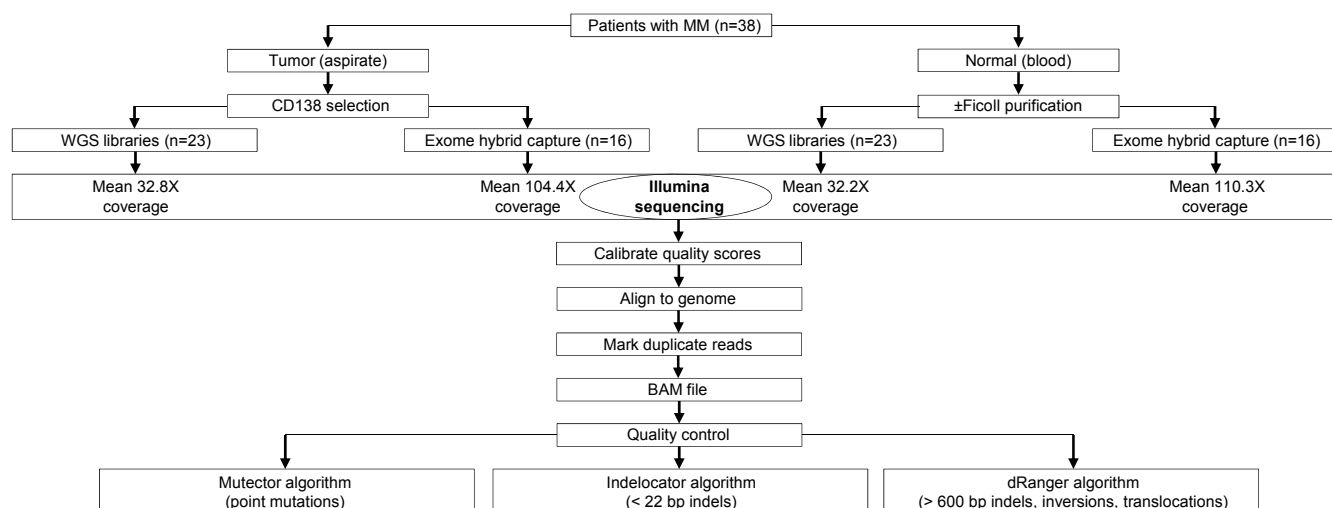

**Supplementary Figure 1 – Sequencing and analytical pipeline for determining somatic mutations in MM.**

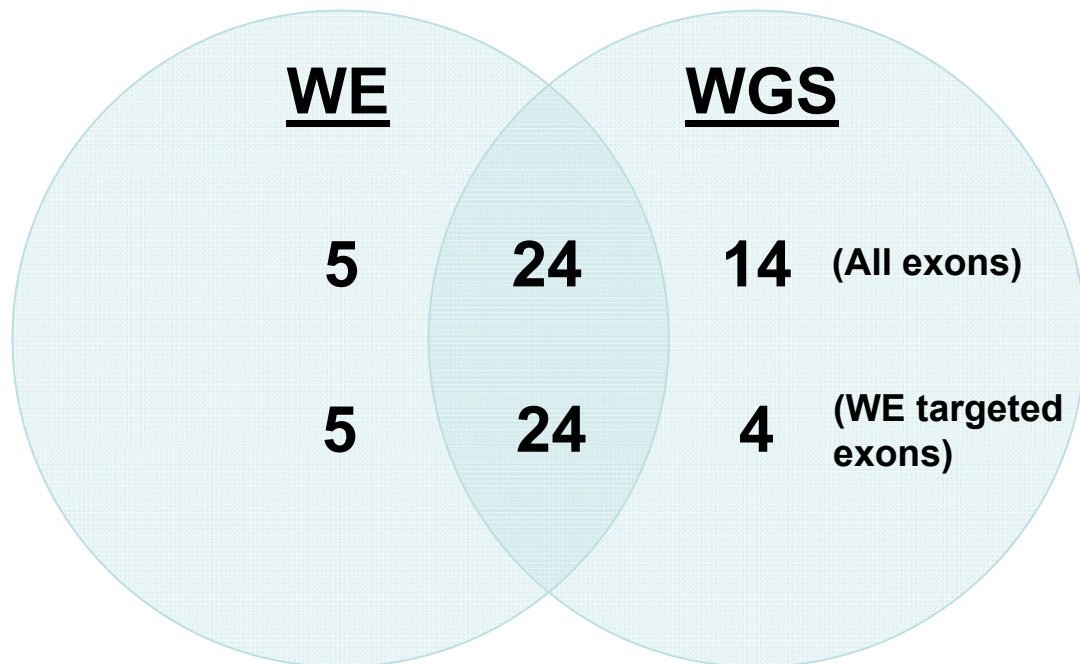

**Sensitivity:**      **67% (all exons)**                      **88%**  
                                          **88% (targeted exons)**

**Supplementary Figure 2 – Sensitivity estimations.** Sample MMRC0191 was sequenced by both WGS and WES. To estimate sensitivity, supporting reads for each nonsynonymous mutation were assessed manually and likely false positives discarded. Then mutations were placed in three groups: detected in WES only, detected in both datasets, or detected in WGS only. These numbers were used to assess sensitivity of the two sequencing methods (upper set of numbers in Venn diagram). A number of mutations that were detected by WGS only were not targeted by the hybrid capture bait set, so to assess the sensitivity of the muTector caller in WES (as opposed to the library production method), these were excluded from the analysis (lower set of numbers in Venn diagram).

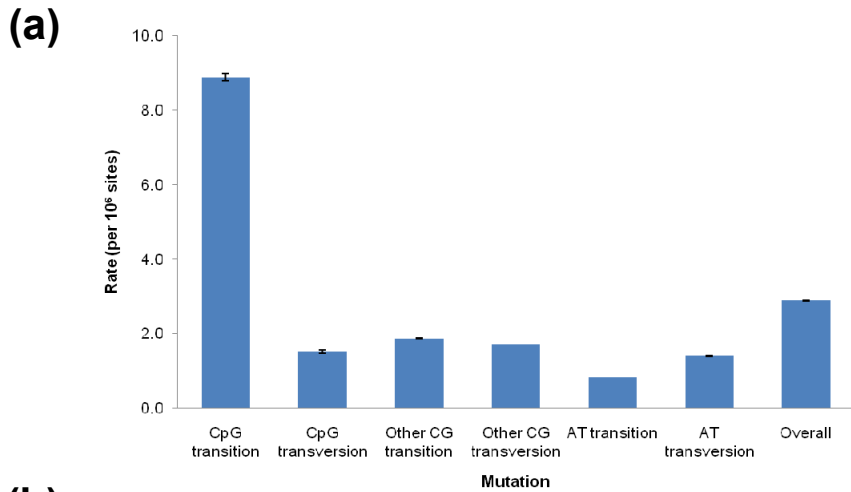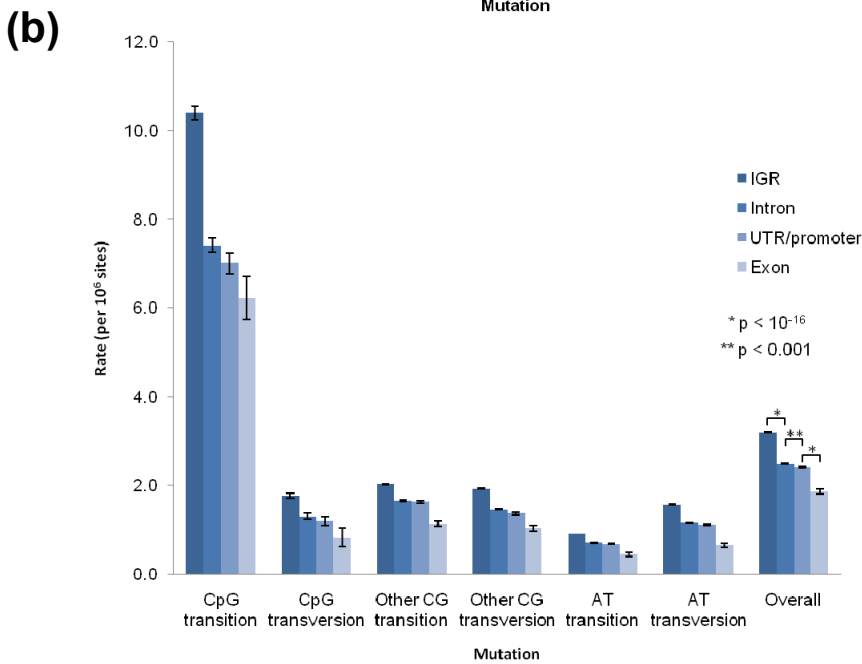

**Supplementary Figure 3 – Base- and region-specific somatic mutations rates.** (a) Mutation rates by base-specific change. Error bars are  $\pm$ estimated s.d. (b) Mutation rates by base-specific change in different genomic regions. Error bars are  $\pm$ estimated s.d.

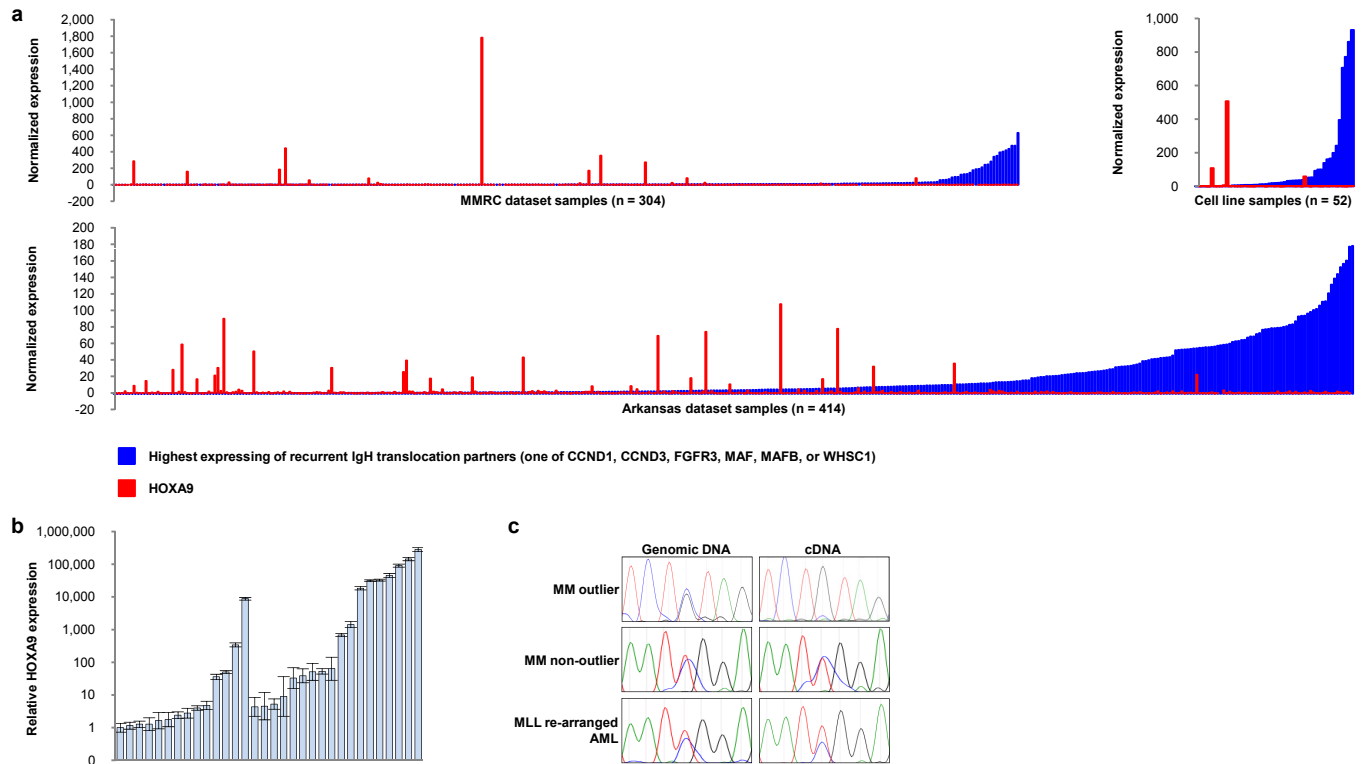

**Supplementary Figure 4 – Patterns of *HOXA9* expression in MM.** (a) Patterns of *HOXA9* expression (red) compared to those of canonical targets of IgH translocation (blue). (b) Ubiquitous expression of *HOXA9* was demonstrated by qPCR. Expression is relative to that of the lowest expressing cell line, JIM3, and values are normalized to expression of  $\beta$ -actin. Error bars are  $\pm$  S.E.M. and represent a minimum of 4 technical replicates. (c) Examples of sequencing traces across informative SNPs in MM samples with outlying *HOXA9* expression (top) and non-outlying *HOXA9* expression (middle). Also included is an MLL-rearranged acute leukemia cell line (bottom). The allele-specific patterns of expression were seen in 2/2 informative outliers, 9/9 informative non-outliers, and 1/1 informative MLL-rearranged AML cell line.

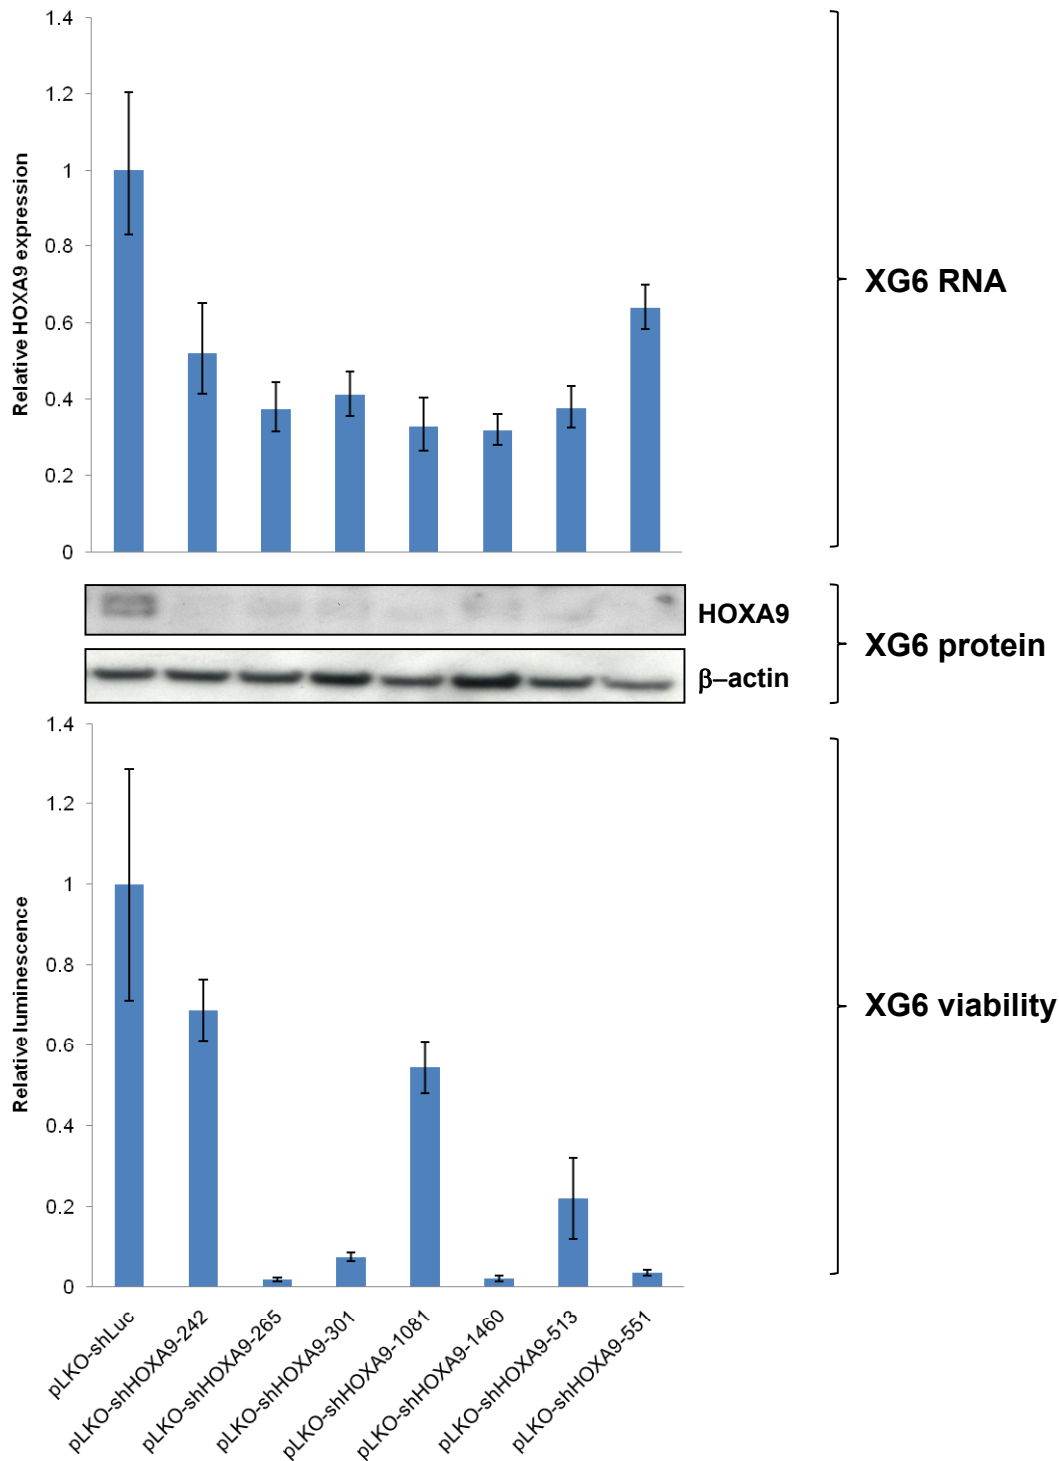

**Supplementary Figure 5 – Knockdown of *HOXA9* is associated with reduced viability in the MM cell line XG6.** *HOXA9* mRNA expression (top) and protein expression (middle) was assayed three and five days (respectively) post-infection with seven independent lentiviral constructs expressing shRNAs targeting *HOXA9* and a control shRNA targeting luciferase (shLuc). XG6 viability ten days post-infection, as assessed by CellTiterGlo, is shown in the lower panel. Error bars in both graphs are  $\pm$ S.E.M. and represent a minimum of four technical replicates (mRNA) or three experimental replicates (relative luminescence).

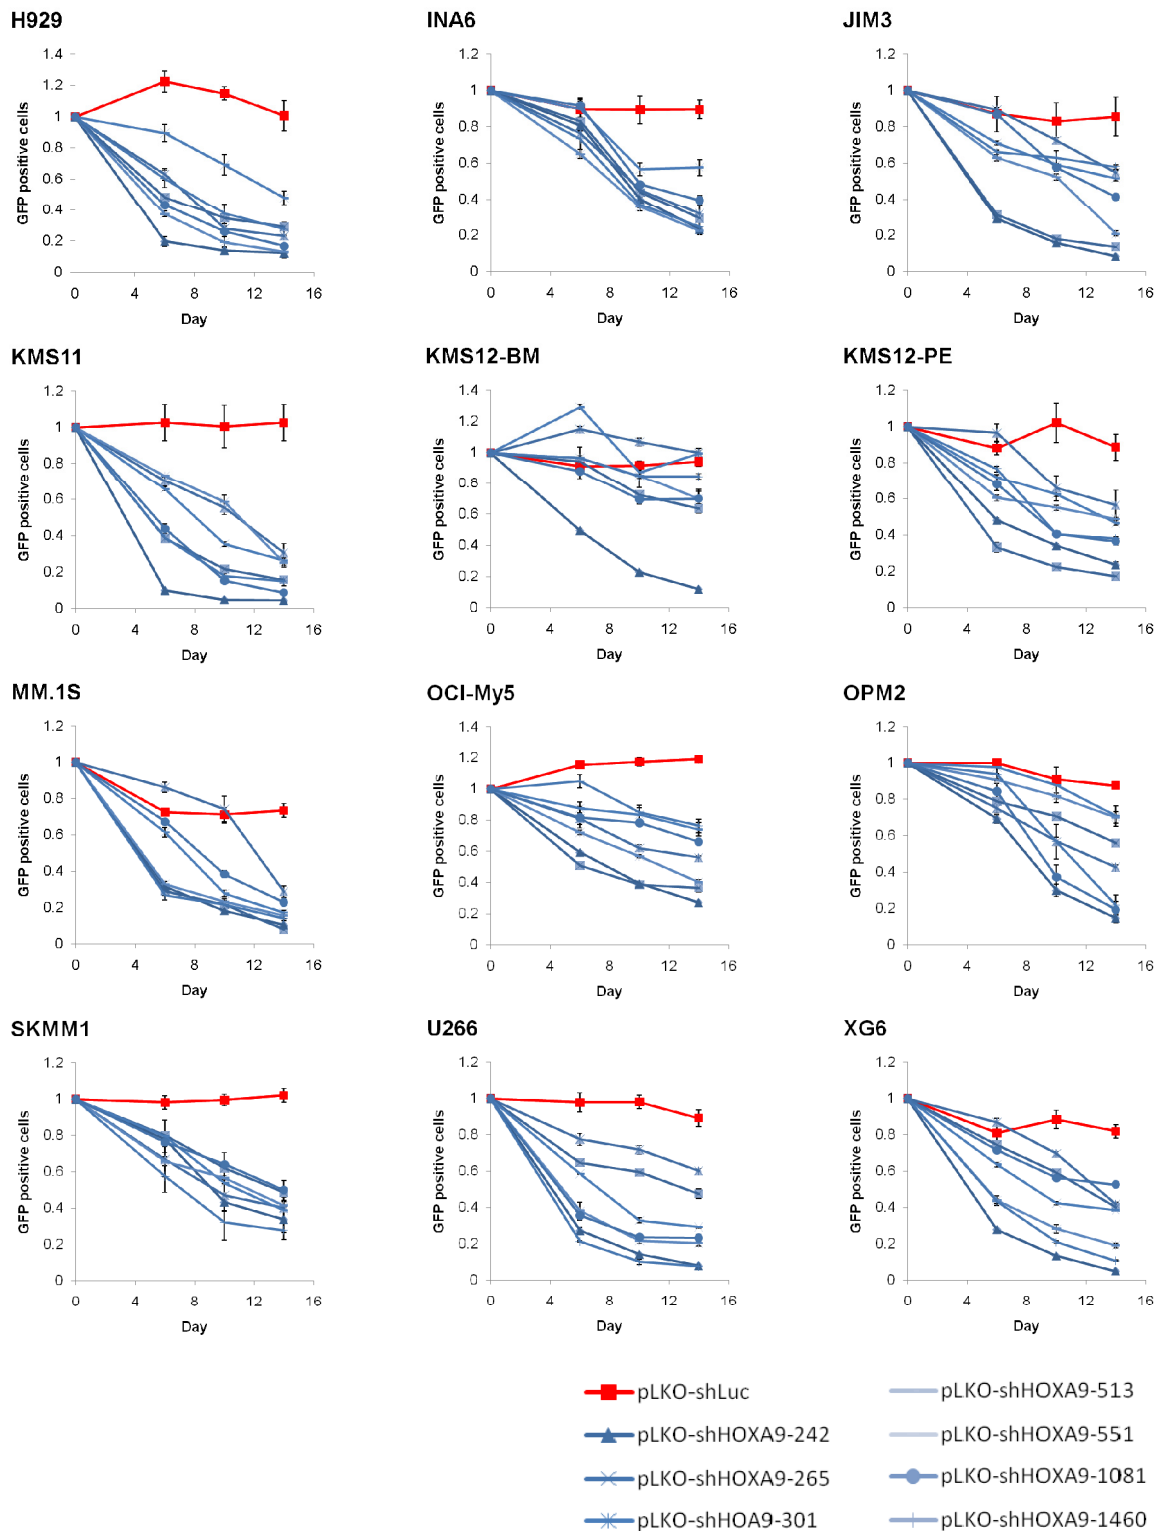

**Supplementary Figure 6 – *HOXA9* is essential for MM survival.** GFP competition assay in MM cell lines. Following lentiviral infection with seven independent shRNAs that target *HOXA9* (blue) or a control shRNA targeting luciferase (shLuc; red), GFP<sup>+</sup> cells were monitored by flow cytometry and compared to the proportion of GFP<sup>+</sup> cells present in the population 3 days post-infection (designated day 0). Error bars are  $\pm$ S.E.M. and represent a minimum of three experimental replicates. Differences between GFP<sup>+</sup> proportions at day 14 for shLuc and targeting hairpins were significant for all hairpins in all cell lines apart from in KMS12-BM.

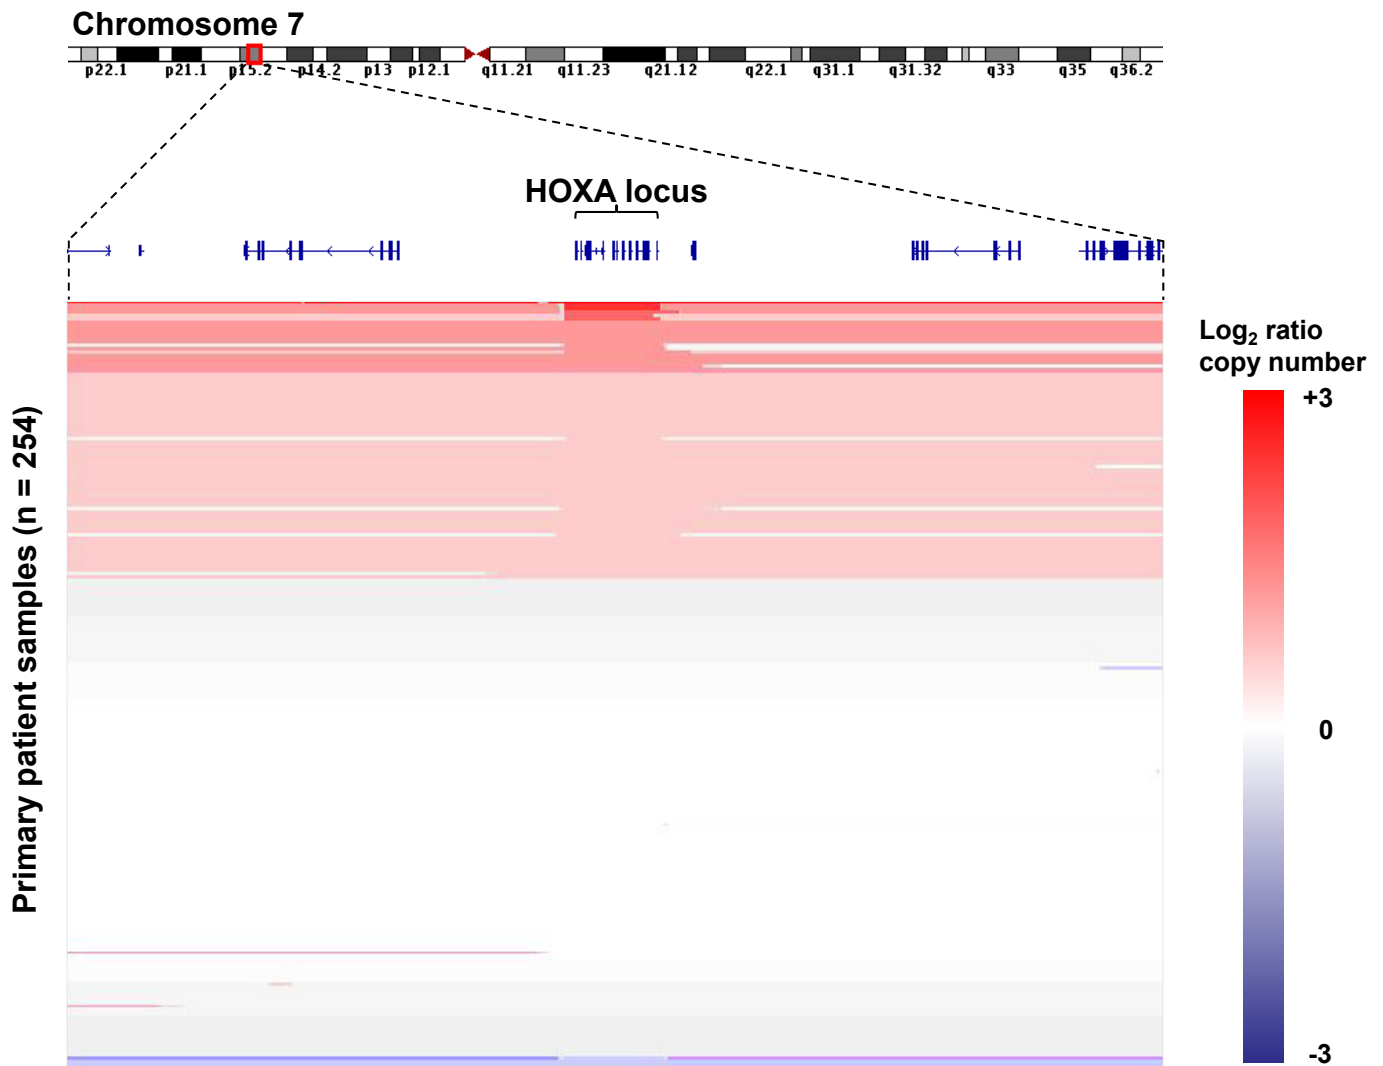

**Supplementary Figure 7 – Focal amplifications at the *HOXA* locus.** A copy number heatmap of the *HOXA* locus and flanking regions in a set of 254 publicly available MM aCGH samples.

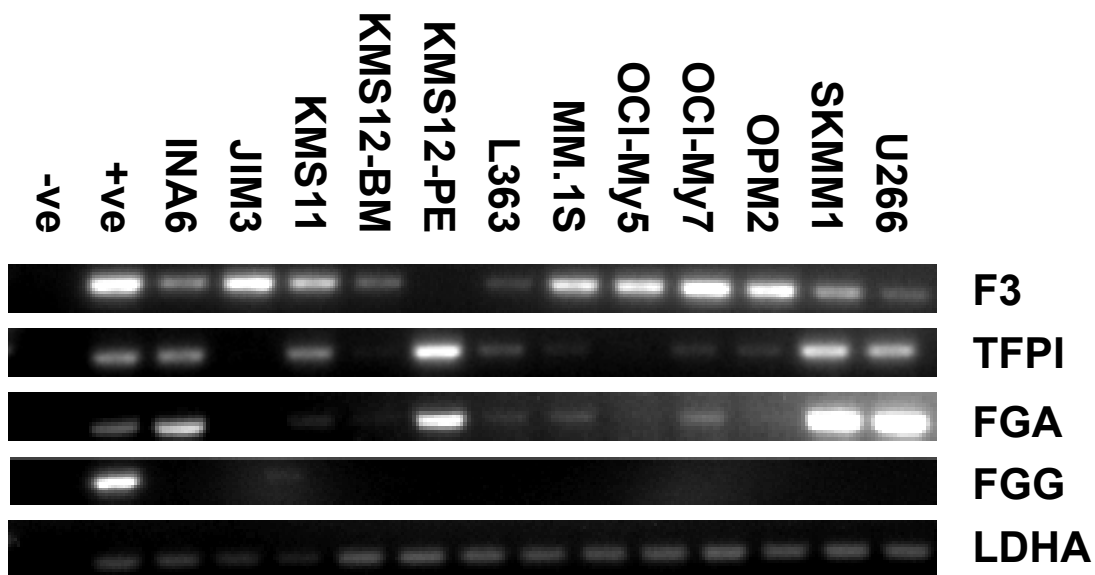

**Supplementary Figure 8 – Expression of coagulation factors in MM cell lines.** F3, TFPI, FGA, and FGG, which were all found to be mutated, were assayed. F5, which is known to be expressed in cells of lymphocytic origin, was not assessed. Positive controls are dermal fibroblasts (F3) or whole liver extract (remainder). An LDHA control was used to ensure approximately even loading.



## Overview

- Obtain genome-wide regulatory potential (RP) scores from regulatory potential track in UCSC browser:

<http://hgdownload.cse.ucsc.edu/goldenPath/hg18/regPotential7X/>

± mask regions of somatic hypermutation.

- Smooth RP scores by averaging in a 100 bp window moved at 10 bp increments across genome.

- Generate discrete regions of regulatory potential – regions of contiguous non-zero RP score.

- Determine total good quality coverage and total number of mutations across all 38 samples in each region.

- Use binomial test to calculate probability of seeing at least observed number of mutations in total area covered. Correct for multiple hypotheses testing.

## Filtering

Exclude regions with:  $q > 0.25$ ; mutations confined to a single sample; exclusively coding mutations; identical mutations at an identical base (likely artifact); evidence of misalignment artifact on manual review of reads (majority of included regions subjected to additional PCR and Sanger sequencing).

## Example: definition of regions in stretch of chromosome 1

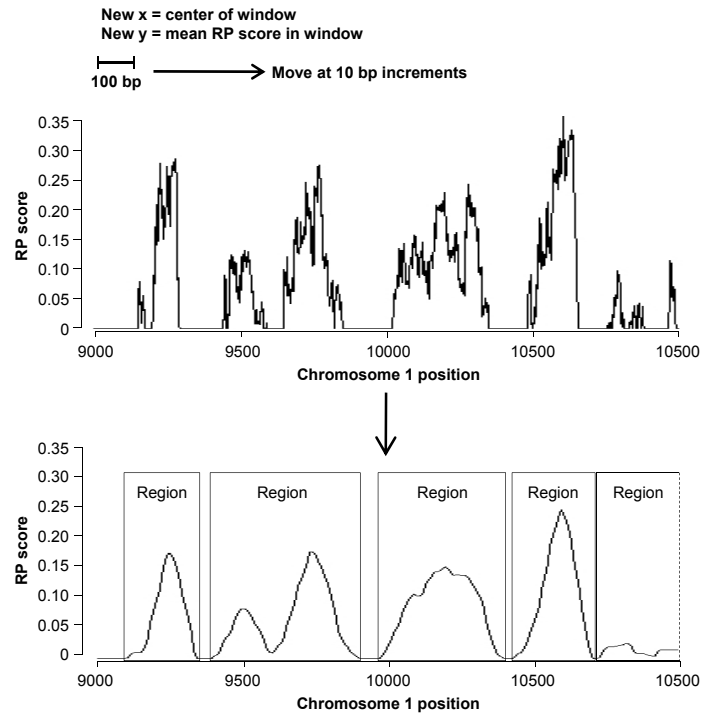

$2.38 \times 10^6$  RP regions genome-wide

## For a given region:

Total good quality coverage of region across all samples,  $N$

Total mutations in region in all samples,  $n$

Mean mutation rate across all regulatory regions,  $\mu$

$$p = 1 - \sum_{i=0}^{\lfloor n \rfloor} \binom{N}{i} \mu^i (1 - \mu)^{N-i}$$

Benjamini-Hochberg procedure,  $2.38 \times 10^6$  observations.

Supplementary Figure 9 – Identification of significantly mutated potential regulatory regions.

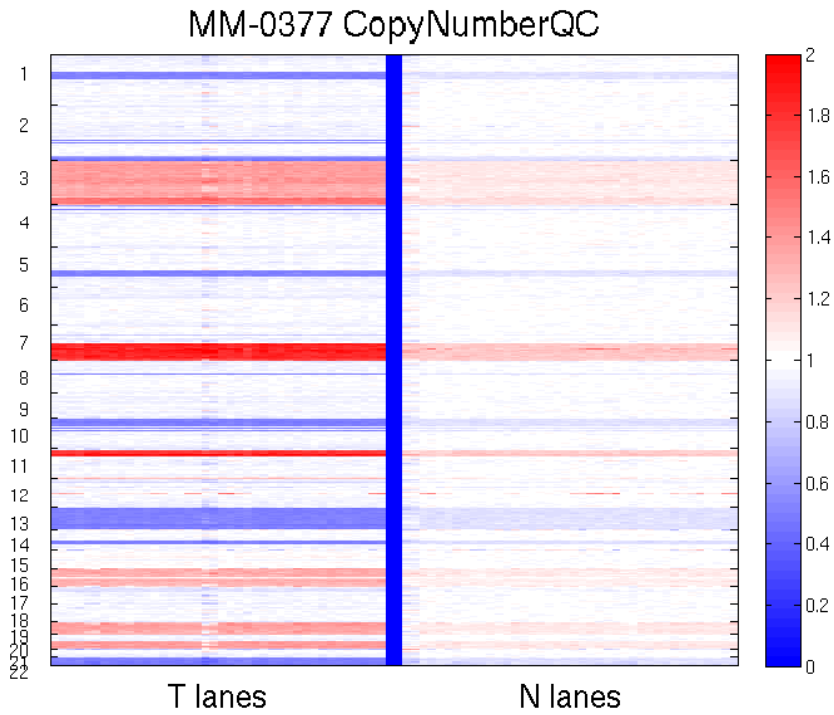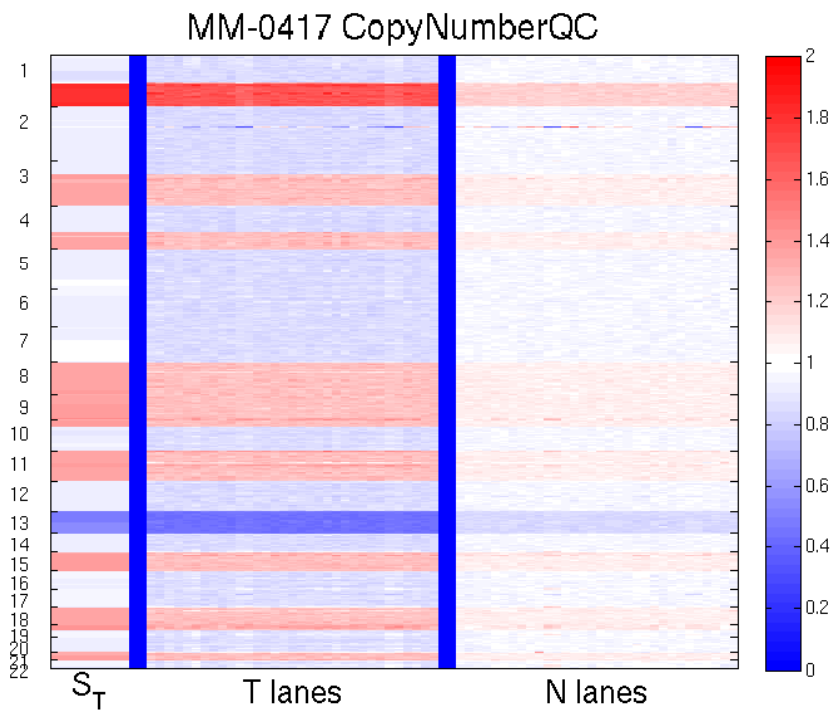

**Supplementary Figure 10 – Copy-number profiles showing tumor-in-normal contamination in two samples sequenced by WGS.** These samples were excluded from analysis. Tumor (T) lanes are shown on the left and normal (N) lanes on the right.  $S_T$  labels an independent aCGH profile for tumor MM-0417.

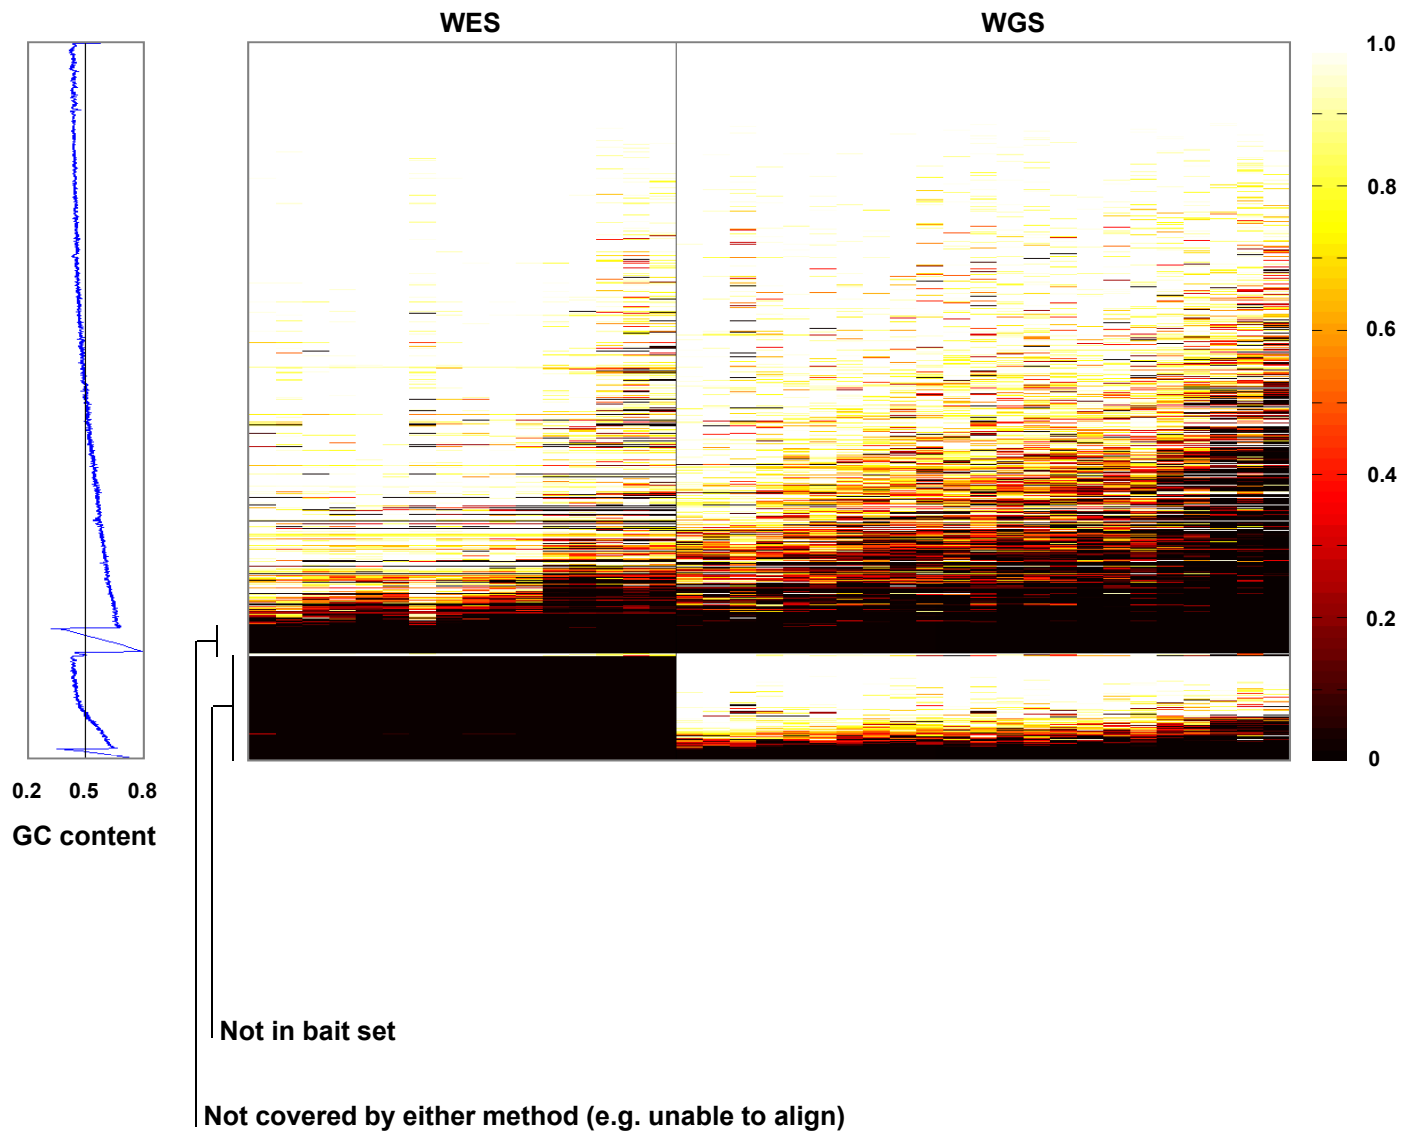

**Supplementary Figure 11 – Genomic coverage by sample.** In the main plot, samples are arranged in columns and coverage is shown by a heat map (key on the right). Regions not targeted by the hybrid capture bait set are arranged at the bottom of the coverage plot, as indicated. Otherwise, regions are ordered by coverage. GC content is shown in the plot on the left.

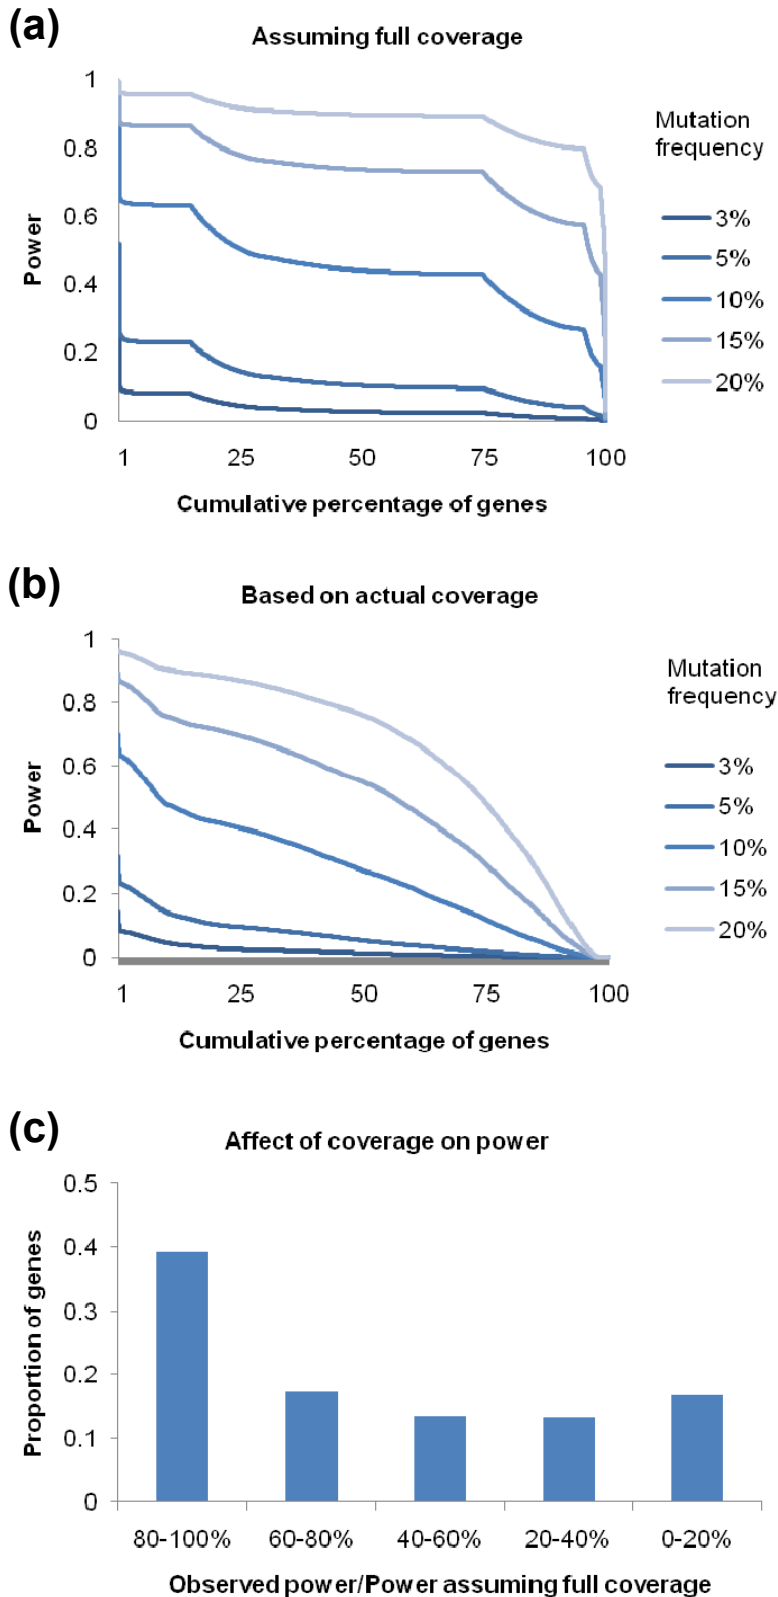

**Supplementary Figure 12 – Effect of coverage on power.** (a) Power to detect genes mutated at frequencies of 20%, 15%, 10%, 5%, and 3% as significant, assuming uniform coverage. (b) As in (a), but recalculated to reflect actual coverage achieved. (c) Distribution of loss of power due to actual coverage. For each gene, the power at observed coverage was divided by the power assuming uniform coverage for each mutational frequency. The mean of these ratios was then taken for each gene and the genes binned as shown.

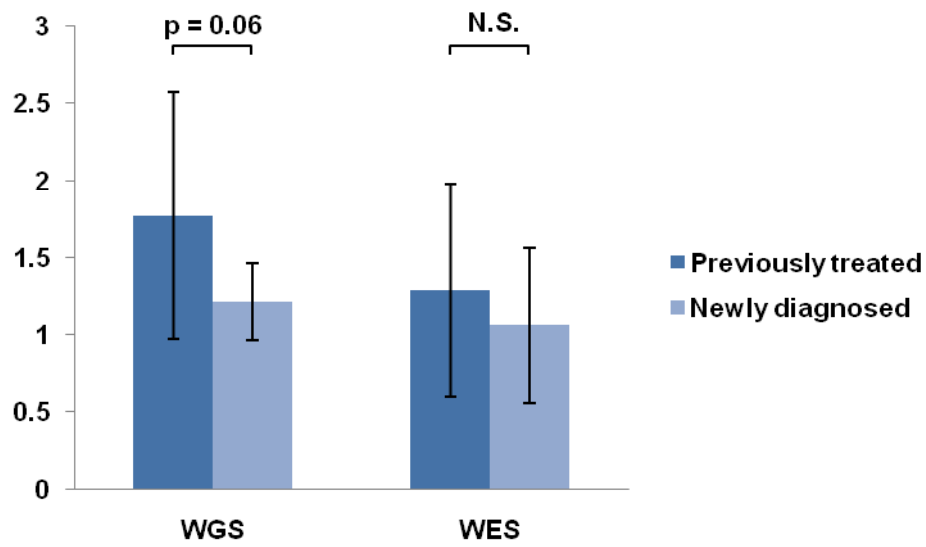

**Supplementary Figure 13 – Nonsynonymous somatic coding mutation rates in previously treated and newly diagnosed patient samples are not significantly different.** Error bars are  $\pm$ estimated s.d. N.S., not significant.

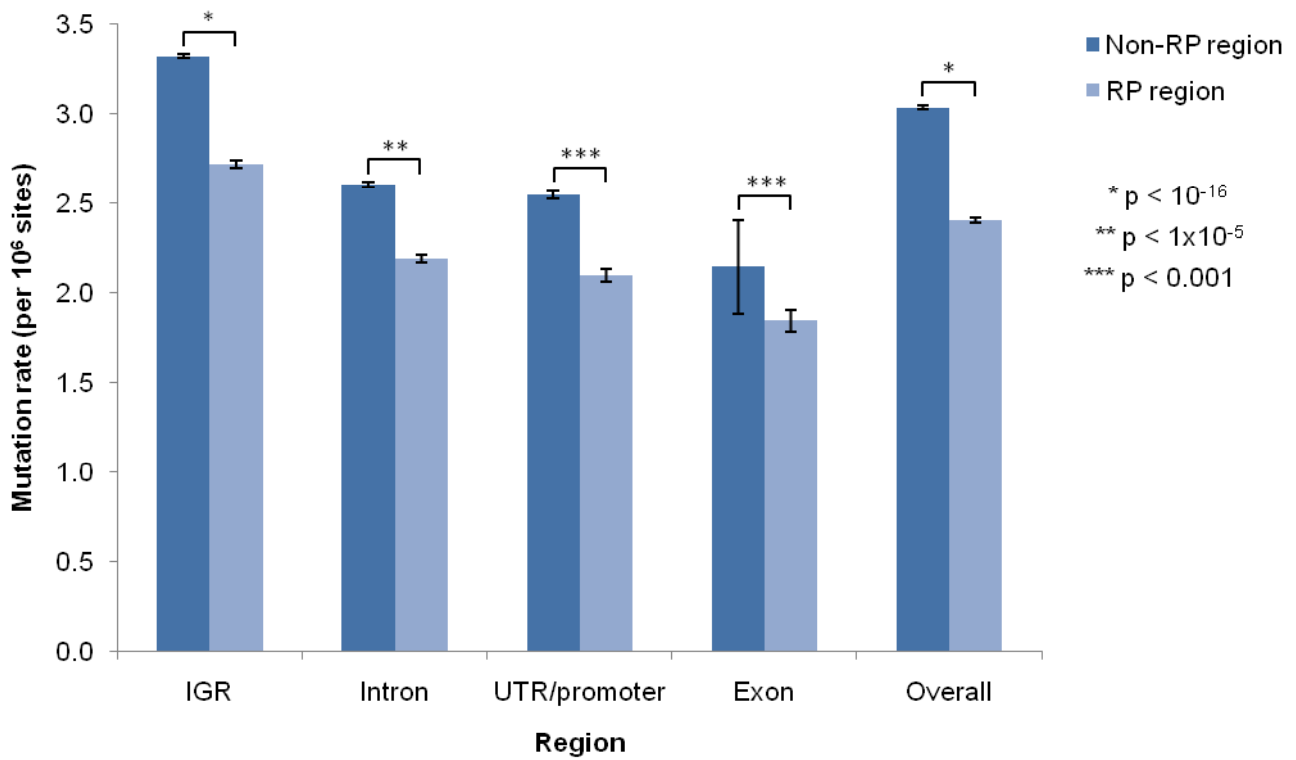

**Supplementary Figure 14 – Defined regions of regulatory potential (RP regions) have a lower mutation rate than the remainder of the genome.** Region-specific and overall mutation rates are shown for the RP and non-RP regions. Error bars are ±estimated s.d.

# Supplementary Methods

## Contents

|                                                                                     |    |
|-------------------------------------------------------------------------------------|----|
| Sequence data generation .....                                                      | 2  |
| Whole Genome Shotgun (WGS) Library Construction.....                                | 2  |
| Whole Exome (WE) Capture Library Construction .....                                 | 3  |
| Illumina sequencing .....                                                           | 3  |
| Sequence data processing .....                                                      | 3  |
| The sequencing data-processing pipeline.....                                        | 4  |
| (1) Base-quality recalibration.....                                                 | 4  |
| (2) Alignment to the genome.....                                                    | 4  |
| (3) Aggregation of lane- and library-level data .....                               | 4  |
| (4) Marking of duplicated reads.....                                                | 4  |
| The Cancer Genome Analysis pipeline (“Firehose”) .....                              | 5  |
| (1) Quality-control.....                                                            | 6  |
| (2) Local Realignment .....                                                         | 7  |
| (3) Somatic single nucleotide variation detection .....                             | 7  |
| (4) Detection of short insertions and deletions.....                                | 9  |
| (5) Identification of chromosomal rearrangements .....                              | 10 |
| (6) Calculation of coverage .....                                                   | 11 |
| (7) Background mutation rate calculation .....                                      | 12 |
| (8) Identification of significantly mutated genes.....                              | 12 |
| (9) Identification of significantly mutated regions with regulatory potential ..... | 13 |
| (10) Assessment of the functional impact of mutations.....                          | 14 |
| Other methods.....                                                                  | 15 |

|                                                                                                                  |    |
|------------------------------------------------------------------------------------------------------------------|----|
| Publicly available expression and copy number datasets.....                                                      | 15 |
| Gene set enrichment analysis (GSEA) for FAM46C co-expressed genes .....                                          | 15 |
| Outlier sum statistic (OSS) calculation .....                                                                    | 15 |
| Cell lines .....                                                                                                 | 16 |
| RT-PCR.....                                                                                                      | 17 |
| Assessment of HOXA9 protein expression.....                                                                      | 17 |
| Assessment of HOXA9 mRNA expression .....                                                                        | 17 |
| Chromatin immunoprecipitation (ChIP) assay for histone 3 lysine 27 trimethyl (H3K27Me3) promoter enrichment..... | 17 |
| HOXA9 knock-down .....                                                                                           | 18 |
| shRNA constructs .....                                                                                           | 18 |
| Generation of virus for knock-down .....                                                                         | 18 |
| Assessing degree of HOXA9 knock-down .....                                                                       | 18 |
| Assessing effects of HOXA9 knockdown .....                                                                       | 18 |
| Determination of DIS3 and FAM46C mutation status in cell lines .....                                             | 19 |
| References .....                                                                                                 | 19 |

## Sequence data generation

### *Whole Genome Shotgun (WGS) Library Construction*

We sheared 1-3 µg of genomic DNA to a range of 100-700 bp using the Covaris E210 instrument. DNA fragments were end-repaired and phosphorylated, followed by adenylation of 3' ends. Standard paired end adaptors were ligated according to the manufacturer's protocol (Illumina). We performed Qiagen min-elute column based cleanups between all enzymatic steps. Adapter ligated fragments were purified with preparatory gel electrophoresis (4% agarose, 85volts, 3 hours) and two bands were excised (500-520bp and 520-540bp) resulting in two libraries per sample with inserts averaging 380bp and 400bp respectively. DNA was extracted from gel bands using Qiagen min-elute columns. The entire volume of final purified fragments was enriched via PCR with Phusion polymerase for 10 cycles.

Each of the resulting WGS libraries was sequenced on an average of 39 lanes of an Illumina GA-II sequencer, using 101 bp paired-end reads, with the aim of reaching 30X average genomic coverage of



distinct molecules per sample. The mean coverage achieved was 33X in the tumors and 32X in the normals.

### ***Whole Exome (WE) Capture Library Construction***

We follow the procedure described by Gnirke *et al.*<sup>1</sup> adapted for production-scale exome capture library construction. Exome targets were generated based on CCDS genes, representing 164,687 exons from ~16,500 genes (representing 93% of known, non-repetitive protein-coding genes and spanning ~1% of the genome). DNA oligonucleotides were PCR amplified, then transcribed in vitro in the presence of biotinylated UTP to generate single-stranded RNA “bait.” Genomic DNA from primary tumor and patient-matched blood normal was sheared, ligated to Illumina sequencing adapters, and selected for lengths between 200-350 bp. This “pond” of DNA was hybridized with an excess of bait in solution. The “catch” was pulled down by magnetic beads coated with streptavidin, then eluted.

Resulting exome sequencing libraries from the process described above were sequenced on three lanes of an Illumina GA-II sequencer, using 76 bp paired-end reads<sup>1</sup>. The mean coverage achieved was 104X in the tumors and 110X in the normals.

### ***Illumina sequencing***

Libraries were quantified using a SYBR Green qPCR protocol with specific probes for the ends of the adapters. The qPCR assay measures the quantity of fragments properly adapter-ligated that are appropriate for sequencing. Based on the qPCR quantification, libraries were normalized to 2nM and then denatured using 0.1 N NaOH. Cluster amplification of denatured templates occurred according to manufacturer’s protocol (Illumina) using V2 Chemistry and V2 Flowcells (1.4mm channel width). SYBR Green dye was added to all flowcell lanes to provide a quality control checkpoint after cluster amplification to ensure optimal cluster densities on the flowcells. Flowcells were paired-end sequenced (2x101bp for WGS and 2x76bp for WE) on Genome Analyzer II’s, using V3 Sequencing-by-Synthesis kits and analyzed with the Illumina v1.3.4 pipeline. Standard quality control metrics including error rates, % passing filter reads, and total Gb produced were used to characterize process performance prior to downstream analysis. The Illumina pipeline generates data files that contain the reads and qualities.

### **Sequence data processing**

Data were processed using two consecutive pipelines:

- (1) The sequencing data-processing pipeline, called “Picard”, developed by the Sequencing Platform at the Broad Institute, starts with the reads and qualities produced by the Illumina software for all lanes and libraries generated for a single sample (either tumor or normal) and produces, at the end of the pipeline, a single BAM file (<http://samtools.sourceforge.net/SAM1.pdf>) representing the sample. The final BAM file stores all reads with well-calibrated qualities together with their alignments to the genome (only for reads that were successfully aligned).
- (2) The Cancer Genome Analysis pipeline, also known as “Firehose”, developed in the Cancer Program at the Broad Institute, starts with the BAM files for the tumor and patient-matched

normal samples and performs various analyses, including quality control, local-realignment, mutation calling, small insertion and deletion identification, rearrangement detection, coverage calculations and others (see details below).

Several of the tools used in these pipelines were developed jointly by the Broad's Sequencing Platform, Medical and Population Genetics Program and the Cancer Program (additional details regarding parts of the pipeline focused on germ-line events, also used for medical and population genetics, will be described elsewhere; DePristo *et al.*, in preparation).

### ***The sequencing data-processing pipeline***

We generated a BAM file for each sample using the sequencing data processing pipeline, known as "Picard" (<http://picard.sourceforge.net/>; Fennel T. *et al.*, unpublished). Picard consists of four steps (briefly described below): (1) recalibration of base qualities, (2) alignment to the genome, (3) aggregation of lane and library data, and (4) marking of duplicate reads.

#### **(1) Base-quality recalibration**

Each base is associated with a Phred-like quality Q score<sup>2</sup> representing the probability that the base call is erroneous. The Q score represents  $-10 \cdot \log_{10}(\text{Probability of error})$ , rounded to an integer value. In order to make sure that Q30 bases indeed have a 1 in a 1000 chance of being wrong we used a GATK tool (<http://www.broadinstitute.org/gatk>) that empirically recalibrates the qualities based on the original Q score (generated by the Illumina software), the read-cycle, the lane, the tile, the base in question and the preceding base. The original quality scores are also kept in the BAM file in the read-level OQ tag.

#### **(2) Alignment to the genome**

Alignment is performed using MAQ<sup>3</sup> (<http://maq.sourceforge.net/>) to the NCBI Human Reference Genome Build 36.3. The reads in the BAM file are sorted according to their chromosomal position. Unaligned reads are also stored in the BAM file such that all reads that passed the Illumina quality filter (PF reads) are kept in the BAM.

#### **(3) Aggregation of lane- and library-level data**

Multiple lanes and libraries are aggregated into a single BAM per sample. Lane-level BAM files are combined to library-level BAM files and these are then combined to sample-level BAM files. The BAM files contain read-groups that represent the library and lane information. Information regarding the read groups appears in the BAM header (see the BAM file specifications in <http://samtools.sourceforge.net/SAM1.pdf>).

#### **(4) Marking of duplicated reads**

Molecular duplicates are flagged using the MarkDuplicates algorithm from Picard (<http://picard.sourceforge.net/>). The method identifies pairs of reads in which both ends map to the

exact same genomic position as being multiple reads of the same DNA molecule and hence marks all but the first as duplicates.

The BAM files that are produced by the Picard pipeline are then delivered to dbGaP. In this study we delivered 52 files representing 26 WGS tumor/normal pairs and an additional 26 files representing 13 WE tumor/normal pairs.

### ***The Cancer Genome Analysis pipeline (“Firehose”)***

The Cancer Genome Analysis pipeline consists of a set of tools for analyzing next-generation data representing tumor DNA samples and their patient-matched normal DNA samples. In order to build a robust pipeline we developed a pipeline infrastructure for managing analysis workflows, called *Firehose* – representing the need to handle the flood of next-generation and high-throughput data (Voet D. *et al.*, unpublished). *Firehose* manages the input files, the analysis tools and the output files, and keeps track of where the data reside, what needs to be executed on each file and in what order, and what is currently running. It also keeps track of versions of the data and methods to enable reproducing the analysis and results. *Firehose* uses GenePattern<sup>4</sup> as its execution engine, which is responsible for actually running the pipelines and modules based on parameters and inputs files specified by *Firehose*.

The analysis contains the following steps (which are detailed below):

- (1) Quality control – ensuring that all data match their corresponding patient and that there are no swaps between tumor and normal data for the same individual.
- (2) Local-realignment of reads – reads in regions that potentially harbor small insertions or deletions are jointly realigned to improve detection of indels and to decrease the number of false positive single nucleotide variations caused by misaligned tips of reads.
- (3) Identification of somatic single nucleotide variations (SSNVs) – candidate SSNVs are detected using a statistical analysis of the bases and qualities in the tumor and normal BAMs that map to the studied genomic site. Post-filtering of candidate mutations removes systematic artifacts. For WGS data, we interrogate every position along the genome, and for WE data, we search for mutations in the neighborhood of the targeted exons (where the majority of reads are located). We also indicate for every analyzed base whether it is sufficiently covered for confident identification of point mutations.
- (4) Identification of somatic small insertions and deletions (SINDELs)– SINDELs are detected by first identifying putative events looking at the tumor BAM (with high sensitivity but also a high false-positive rate), and then filtering out noisy events and potential germline events (using the normal data).
- (5) Identification of inter-chromosomal and large intra-chromosomal structural rearrangements (SRs) – candidate rearrangements are identified as groups of paired-end reads which connect genomic regions with an unexpected orientation and/or distance on the same chromosome or from different chromosomes. Next, the method applies filters to remove germline and false-positive calls.

- (6) Calculation of coverage— calculates coverage statistics across the genome broken up according to different genomic zones. The zones include intergenic regions, exons, introns, untranslated regions (UTRs), and promoters. Each zone was further divided into regulatory potential (RP) regions and non-RP regions (see below).
- (7) Mutation rate calculation – calculates mutation rates based on the detected mutations (SSNVs and SINDELs) and the coverage statistics. Mutations (and bases) are further partitioned into mutation categories such as mutations in (i) Cs or Gs in CpG dinucleotides, (ii) As or Ts, (iii) other Cs or Gs, (iv) mutations that disrupt the genes such as frameshift SINDELs and non-sense mutations and (v) in-frame SINDELs.
- (8) Identification of significantly mutated genes, COSMIC sites, or gene sets – significantly mutated genes/ gene sets are detected by comparing the observed number of mutations (from each category) across the samples to the expected number based on the background mutation rates and the covered bases in all samples.
- (9) Identification of significantly mutated regions with regulatory potential (RP regions) – RP regions are identified from a UCSC track. Significantly mutated regions are detected by comparing the observed number of mutations across the samples to the expected number based on the background mutation rates and the covered bases in all samples.
- (10) Mutation impact analysis – functional impact (FI) scores for all non-synonymous point mutations were calculated using the xvar.org website (<http://xvar.org/>). This step is not yet automated and was performed manually.

## (1) Quality-control

### *Matching Individual*

Genotypes were determined from SNP6.0 arrays (whenever available for the sample) using the Birdseed algorithm<sup>5</sup>. Homozygous non-reference sites were compared to observed bases for each lane separately. Lanes which had <95% concordance to SNP arrays were excluded from the analysis.

### *Tumor and Normal Matching*

We detected tumor/normal swaps using two methods.

- (1) For WGS data, we sequenced two libraries for each sample (tumor and normal). The insert size distribution is a characteristic of the library. Lanes with an insert-size distribution that does not match the distribution of the other lanes generated from the same library are excluded from the analysis.
- (2) For WGS and WE data, we compared the copy-number profile of each lane (assessed using the depth of coverage in windows of 100kb along the genome) to the profile determined by SNP or aCGH arrays. Tumor lanes that do not match the expected profile or normal lanes that deviate from the expected flat profile were excluded from the analysis.

### *Exclusion of tumor-in-normal samples*

By studying the copy-number profile of the normal lanes, we were able to detect various levels of contamination of tumor cells in the normal samples (Supplementary Fig. 10). Although patients with frank plasma cell leukemia had been excluded from the study, it was noted that contaminated samples had all been Ficoll purified (potentially selecting for clonotypic cells) and had been donated by patients who had received multiple courses of treatment for MM (and who were therefore at increased risk for extra-medullary disease). As a result of this contamination, we excluded 4 samples that had a high level of tumor-in-normal contamination and kept 3 samples with low level contamination that did not seem to affect our ability to detect somatic events.

## **(2) Local Realignment**

The purpose of this step is to take into account, and ensure the consistency of, all the evidence for an indel available from multiple reads mapped to the same region. When placing reads one-at-a-time (as most short read aligners do, including MAQ that was used for this study) several problems may occur due to indels:

- (a) An aligner may not be considering placements with indels at all. For example, MAQ does not consider indels with unpaired sequencing data. Even with paired data, as in this study, when both ends are mapped (potentially sub-optimally) without an indel, MAQ will not further look for a better alignment with an indel.
- (b) Even when indels are considered, whenever an indel occurs close to the end of the read, the aligner often prefers a gapless alignment with a few mismatches at the end of the read.
- (c) Sequencing errors and/or variations in base qualities in individual reads may result in indels placed inconsistently at different nearby locations, especially in highly repetitive, low-complexity regions.

Often, there is a mixed situation in which some reads place the indel correctly (when it is in the middle of the read) while a few more reads that would have the same indel near the end are placed with mismatches and no gap. Not correcting these placements reduces the ability to detect indels and increases false positive indel and single-nucleotide variation calls.

We applied the IndelRealigner module in GATK (DePristo M. *et al.*, submitted) [<http://www.broadinstitute.org/gatk>] that performs multiple sequence alignment of reads next to putative indel sites identified by either the presence of an indel in at least one read or a run of consistent consecutive mismatches.

## **(3) Somatic single nucleotide variation detection**

Mutation detection for both whole genome and capture data was performed using a highly sensitive and specific method we have developed in-house called *muTector* (Cibulskis K. *et al.*, in preparation). In brief, *muTector* consists of three steps.

- (1) Preprocessing the aligned reads in the tumor and normal sequencing data. In this step we ignore reads with too many mismatches or very low quality scores since these represent noisy reads that introduce more noise than signal.

- (2) A statistical analysis that identifies sites that are likely to carry somatic mutations with high confidence. The statistical analysis predicts a somatic mutation by using two Bayesian classifiers – the first aims to detect whether the tumor is non-reference at a given site and, for those sites that are found as non-reference, the second classifier makes sure the normal does not carry the variant allele. In practice the classification is performed by calculating a LOD score (log odds) and comparing it to a cutoff determined by the log ratio of prior probabilities of the considered events. For the tumors we calculate

$$\text{LOD}_T = \log_{10} \left( \frac{P(\text{observed data in tumor} | \text{site is mutated})}{P(\text{observed data in tumor} | \text{site is reference})} \right), \text{ and for the normal}$$

$$\text{LOD}_N = \log_{10} \left( \frac{P(\text{observed data in normal} | \text{site is reference})}{P(\text{observed data in normal} | \text{site is mutated})} \right).$$

Since we expect somatic mutations to occur at a rate of  $\sim 1$  in a Mb, we require  $\text{LOD}_T > \log_{10}(0.5 \times 10^{-6}) \approx 6.3$  which guarantees that our false positive rate, due to noise in the tumor, is less than half of the somatic mutation rate. In the normal, not in dbSNP sites, we require  $\text{LOD}_N > \log_{10}(0.5 \times 10^{-2}) \approx 2.3$  since non-dbSNP germline variants occur roughly at a rate of 100 in a Mb. This cutoff guarantees that the false positive somatic call rate, due to missing the variant in the normal, is also less than half the somatic mutation rate.

- (3) Post-processing of candidate somatic mutations to eliminate artifacts of next-generation sequencing, short read alignment and hybrid capture. For example, sequence context can cause hallucinated alternate alleles but often only in a single direction. Therefore, we test that the alternate alleles supporting the mutations are observed in both directions.

As muTector attempts to call mutations it also generates a coverage file (in a wiggle file format<sup>6</sup>, which indicates for every base whether it is sufficiently covered in the tumor and normal to be sensitive enough to call mutations – see section on coverage below). We currently use cutoffs of at least 14 reads in the tumor and at least 8 in the normal (these cutoffs are applied after removing noisy reads in the preprocessing step).

### *Accuracy of muTector*

In order to estimate the specificity of the method, we selected a semi-random set of 100 somatic single nucleotide variations in coding exons. Initial selection was random, but for each gene with more than one mutation, other observed variants were selected for genotyping. We attempted to design Sequenom genotyping assays for these 100 mutations and assay design was successful for 92. 87 of these 92 mutations were validated as somatic mutations (Supplementary Table 4), yielding an estimated true positive rate of 95% (95% CI, 88%-98%). All 5 mutations that failed to be confirmed were not present in the tumor. Larger validation efforts in other datasets have consistently estimated the true positive rate at  $\sim 90\%$ .

### *Effect of coverage on mutation detection and sensitivity*

Sensitivity is more challenging to assess than FP rate, owing to the lack of a set of “ground truth” mutations. The mutation rates of *NRAS* and *KRAS* were towards the upper end of the range of their published prevalence in MM, implying good sensitivity in this single case. Sensitivity is not uniform for all genes, however, and is influenced to a large extent by exonic coverage. This, in turn, is influenced by GC content (with lower coverage in more GC-rich areas, often due to difficulty in performing alignment of reads) and, in the case of WES, by whether exons were targeted by the bait and whether the bait was successful in capturing the prey (Supplementary Fig. 11). Non-uniform coverage results in reduced sensitivity for some genes (Supplementary Fig. 12). Thus, for example, our power to detect a mutation with a 20% frequency as significant would be greater than 0.8 for the majority of genes, assuming uniform coverage (Supplementary Fig. 12a). However, the non-uniform coverage results in a greater than 0.8 power for only about half the genes (Supplementary Fig. 12b). In about 17% of genes, the power to detect significant mutations is reduced by more than 80% owing to poor coverage (Supplementary Fig. 12c).

To attempt to better define our sensitivity, we examined the sample for which we had performed both WES and WGS (Supplementary Fig. 2). We first excluded false positive mutations (by manual review of supporting reads). We then assessed the numbers of mutations identified by muTector in WES alone, in both WES and WGS, and in WGS alone. This suggested sensitivities of 67% for WES and 88% for WGS. Reduced sensitivity in WES was entirely due to an absence of targeting by the bait set. When analysis is restricted to targeted regions, the sensitivity of muTector in WES is the same as that in WGS (88%).

### *Annotation of mutations*

- (4) Each mutation was annotated with additional information regarding the following parameters.
  - (1) The genomic zone – exon, intron, promoter, UTR, intergenic region (IGR).
  - (2) Position in protein.
  - (3) Mutation type – non-synonymous, silent, splice site.
  - (4) Amino acid change.
  - (5) Protein domain.

Somatic mutations are listed in Supplementary Table 3.

## **(4) Detection of short insertions and deletions**

Indel calling operates on locally realigned data (see above) and consists of two steps: (i) calling putative indel events (with high sensitivity); (ii) filtering the initial putative calls.

The indel calling step is performed by counting indel events in reads at every locus (in the tumor BAM) and applying basic cutoffs on statistics such as e.g. the indel allele-fraction (fraction of indel-containing reads). These high sensitivity calls are further filtered in the next step by examining additional characteristics of the alignments in the neighborhood such as the average number of mismatches in the reads, distribution of base qualities and others. The events are further annotated as germline or somatic

based on whether any evidence for the event at the same locus is observed in the normal data. Further details will be provided elsewhere (Sivachenko *et al.*, in preparation).

### *Indel validation*

We attempted to design Sequenom assays for all called indels. It was possible to design assays for 10/23. Of these, 80% (95% CI 44-97%) were positively validated. Other small indels were subject to manual review of supporting reads using the Integrative Genomic Viewer (IGV; Robinson J. *et al.*, in preparation) and false positive calls excluded.

Validated indels are listed in Supplementary Table 4.

## **(5) Identification of chromosomal rearrangements**

### *Rearrangement detection*

For detection of chromosomal rearrangements, we have developed the *dRanger* algorithm (Lawrence M.S. *et al.*, in preparation). The first step of the algorithm is identification of groups of read-pairs in the tumor that are discordant, i.e. mapped to locations that are distant from each other in the genome, either on different chromosomes or farther apart on the same chromosome than would be expected from the insert-size distribution of the fragment library (which is typically 400 +/- 50bp). For intra-chromosomal pairs, we use a cutoff of 600bp for pairs of standard orientation (i.e. one read on the forward strand and the other read on the reverse strand and mapped to a later position on the chromosome), and 200bp for pairs of anomalous orientation (any other configuration, including both pairs on the same strand). Each such set of discordant pairs corresponds to a potential rearrangement event. For each set, the matched normal is examined to count how many (if any) read-pairs in the normal also support the event (and thus identify it as a germline, as opposed to a somatic, event). Additionally, a panel of normals is examined, to identify germline events that may have a low detection rate due to poor mapability or other factors. Next, a series of filtering metrics are computed for each potential rearrangement.

- (1) The fraction of reads in the vicinity of each endpoint that have mapping quality of zero.
- (2) The number of distinct kinds of discordant pairs in the vicinity of each endpoint.
- (3) The standard deviation of the starting positions of the supporting reads.

These filtering metrics are combined into an overall quality measure, where 0 indicates a likely artifact and 1 indicates a likely true event. Finally, a score is assigned to each rearrangement by multiplying the number of supporting reads times the quality.

Rearrangements were annotated according to the RefSeq database. For each rearrangement, each endpoint was annotated as to whether it occurred in an intergenic region or a gene, and, if the latter, whether the endpoint was in an intron, a UTR, or an exon. For rearrangements with both endpoints located in genes, the rearrangement was further annotated as to whether it could potentially cause a gene fusion (either in frame or out of frame).



All reported rearrangements were further filtered for their ability to disrupt protein coding of genes (Supplementary Table 3). This is in contrast to their ability to affect normal transcript level, which is harder to predict with confidence. Thus, reported rearrangements include the following: deletions and tandem duplications affecting at least part of one coding exon, but not all coding exons in a gene; inversions with a breakpoint between the ATG and stop codon, but not limited to a single intron; and translocations with a breakpoint between the ATG and stop codon. It should be noted that this filtering will exclude many of the recurrent IgH translocations, in which the breakpoint of the target gene often lies up to 1 Mb away from the transcriptional start site (by contrast, WHSC1 mutations were frequently found, as their breakpoint often lies within the WHSC1 gene).

#### *Assembly of breakpoint sequences*

For each predicted rearrangement, the nucleotide-level structure of the chimeric junction was determined using our *BreakPointer* algorithm (Drier Y. *et al.*, in preparation). Briefly, the algorithm looks for reads that mapped to either side of the rearrangement and had a pairmate that the aligner was unable to align. These unmapped pairmates are then subjected to a modified Smith-Waterman alignment procedure with the ability to jump between the two reference sequences at the best fitting point.

#### *Rearrangement validation*

Large-scale PCR validation in other projects yielded a TP rate of 90% for rearrangements with at least 8 supporting reads, 85% for rearrangements with at least 4 supporting reads, and 80% for rearrangements with at least 2 supporting reads. To increase our specificity, we performed manual review of supporting reads for all reported rearrangements (i.e. those predicted to disrupt protein coding – see above). It should be noted that, compared to PCR validation, the dRanger false positive rate as assessed by manual read review was very similar for rearrangements with high numbers of supporting reads, but much higher for rearrangements with 2 supporting reads (the majority of called rearrangements). It is thus likely that filtering by manual review of supporting reads results in higher specificity but lower sensitivity calls than validation by PCR.

### **(6) Calculation of coverage**

For purposes of determining the significance of observed mutation patterns, a base was defined as being “covered” if there were at least 14 reads that overlapped the position in the tumor and 8 reads in the normal. The number of covered bases was tabulated across the genomes of the WGS samples and the exomes of the WE samples.

Genomic territory was broken down according to a series of criteria. First, the genome was divided into genes and intergenic regions (IGR), according to the RefSeq database. Then, within each gene, the transcribed sequence was divided into exons, introns, and 5'- and 3'-untranslated regions. Furthermore, a “promoter” region was imputed to exist in the 3-kb region directly upstream from the 5'-UTR.

To capture the fact that the genome contains many regions that are highly repetitive or otherwise problematic, genomic territory was further split into “good” and “bad”. This was done empirically using the observed characteristics of sequence data from a normal sample (MM-0319). A region was called “bad” if it contained one or more of the following.

- (1) A high proportion of reads with mapping quality equal to zero, which is the convention that the aligner program Maq uses to indicate that the read could have been placed at any of a number of equivalent locations in the genome, and that specific position was chosen randomly. This indicates a highly repetitive sequence where variant calls are necessarily unreliable.
- (2) A large number of different kinds of discordant pairs.
- (3) An extremely high concentration of non-reference bases.

### **(7) Background mutation rate calculation**

To account for the fact that certain base contexts are known to have increased mutation rates, e.g. C residues in CpG dinucleotides, we calculated separate context-specific mutation rates for transitions and transversions affecting CpGs, other C or G, or AT basepairs. We also calculated these rates separately for the various zones (e.g. exon vs. intron, good vs. bad). Although the mutation rate in samples from relapsed patients was higher than in samples from newly diagnosed patients, the difference was not significantly different (Supplementary Fig. 13).

We compared mutation rates in the introns of commonly expressed genes to those in rarely expressed genes in MM. We used the MMRC expression dataset (see below) to divide the genes of the genome into seven categories: (1) expressed in >75% of multiple myeloma samples; (2) expressed in 50-75%; (3) expressed in 25-50%; (4) expressed in 5-25%; (5) expressed in at least one sample and less than 5%; (6) no expression detected in any sample; and (7) no expression data. We then computed intronic somatic mutation rates in these 7 categories. We chose to exclude intronic rates in category (6) because this will include poorly performing probe sets and ubiquitously expressed genes whose basal expression levels are very low and undetectable by Affymetrix profiling (e.g. transcription factors). We also excluded intronic rates in category (7), for obvious reasons. These data are shown in Fig. 1a.

### **(8) Identification of significantly mutated genes**

For analysis of mutation data and identification of significantly mutated genes and extragenic elements, we have developed an algorithm called MutSig (Lawrence *et al.*, in preparation), based in part on methods we have published elsewhere<sup>7,8</sup>. In brief, we tabulate the number of mutations and the number of successfully sequenced (i.e. “covered”) bases for each gene. The counts are broken down by mutation context category (CpG, other C:G, A:T). For each gene, we calculate the probability of seeing the observed constellation of mutations or a more extreme one, given the background mutation rates calculated across the dataset. This is done by convoluting a set of binomial distributions, as described previously<sup>9</sup>. This p-value is then adjusted for multiple hypotheses according to the Benjamini-Hochberg procedure for controlling False Discovery Rate (FDR), obtaining a q-value.

We extended our significance analysis beyond single genes by looking at gene sets. We downloaded the list of canonical pathways used in Gene Set Enrichment Analysis (GSEA). This list contains 639 gene sets corresponding to known pathways or gene families. We considered all pathways that contained at least one gene in the set of genes targeted in WE sequencing, a list of 616 gene sets. For each gene set, we tabulated the number of mutations in the geneset (i.e. mutations occurring in any component gene), as well as the total number of covered bases in all genes in the geneset. Counts were broken down by base-context category as in the single-gene analysis. A p-value was calculated for each gene set as above, and then a q-value was computed to account for the list of 616 hypotheses.

### **(9) Identification of significantly mutated regions with regulatory potential**

In addition to cataloguing all point mutations, small indels, and larger re-arrangements that would disrupt protein coding regions, we wanted to assess whether it was possible to detect non-coding mutations in regulatory regions (promoters, enhancers, silencers, etc.). The genome-wide annotation of these regions is very limited compared to coding regions, so we adopted the following strategy (see also Supplementary Fig. 9).

- (1) Define genome-wide regions of “regulatory potential” (RP regions).
- (2) Assess the numbers of mutations seen in each RP region for significance and correct for multiple hypothesis testing.
- (3) Perform filtering and validation.

Each of these steps is outlined below.

#### *Definition of RP regions*

We downloaded the regulatory potential track from the UCSC browser<sup>10, 11</sup> (<http://hgdownload.cse.ucsc.edu/goldenPath/hg18/regPotential7X/>). See Kolbe *et al.*<sup>11</sup> for full details of how this RP score was defined, but briefly, the method involved training Markov models on three-way (human/mouse/rat) alignments of experimentally defined regulatory regions and three-way alignments of ancestral repeat regions, representing neutral DNA. The model was then applied to a genome-wide three-way alignment and the RP score calculated from the log-ratios of the transition probabilities of the two Markov models at any given position.

The RP scores as downloaded represent base-to-base scores. To define our RP regions, we processed the scores by passing a sliding window of 100 bp over each chromosome, moved at increments of 10 bp, and taking transitions between zero and any nonzero score to be the boundaries. This procedure yielded a list of a total 2.38 million RP regions for the entire hg18 genome.

We compared the background mutation rates in the RP and non-RP regions from WGS. We found lower observed somatic mutation rates in RP regions compared to non-RP regions (Supplementary Fig. 14). This effect persisted even when controlling for base context, with the difference being seen for each individual base-context category.

### *Assessing RP regions for significance*

For each RP region, we calculated the number of mutations observed across the panel of 23 patients sequenced by WGS, and the number of covered bases. We performed a p-value calculation and an FDR correction for the 2.38 million hypotheses. This yielded a list of RP regions ranked by significance level.

### *Filtering and validation*

We noted that many of the top regions were situated in the various immunoglobulin loci (IgH, Igκ, and Igλ), known to be targeted by somatic hypermutation. We also observed a region spanning the promoter, first non-coding exon, and part of the first intron of *BCL6*, another region known to undergo somatic hypermutation<sup>12</sup>. This identification of known regions of somatic hypermutation, shown in Supplementary Table 9, was encouraging, but we were keen to identify mutations in regulatory regions that may be drivers of MM pathogenesis. We therefore repeated the analysis following masking of known regions of somatic hypermutation. This yielded 116 regions with  $q < 0.25$ . We excluded 37 regions because all of the mutations were confined to a single sample. We further excluded one region that included the first coding exon of *NRAS* and in which all 5 mutations were non-synonymous coding mutations within this exon.

We then performed manual review of the supporting reads for the remaining regions. This excluded 60 regions, leaving 18 potential significantly mutated regulatory regions (Table 2). 11/18 of these regions were subjected to validation by PCR and Sanger sequencing (PCR primers and conditions are shown in Supplementary Table 11). All 11 tested sets of mutations were validated as true positives, confirming high specificity of filtering by manual review.

## **(10) Assessment of the functional impact of mutations**

For each mutation, we obtained an estimate of the likelihood that the mutation impacts the protein functionally, using the xvar.org website (<http://xvar.org>; B. Reva, personal communication) to calculate a Functional Impact (FI) score<sup>13</sup>. We compared the distribution of these FI scores across the mutations found in significantly mutated genes vs. all other genes by the Kolmogorov-Smirnov test (Fig. 1b). To exclude the possibility that the difference was due to mutations in any single highly conserved gene, we repeated the calculation, sequentially leaving out each gene (and both genes for *NRAS* and *KRAS*). For each leave-one-out test, the difference remained significant. To test whether the significant difference was due to the set of genes or set of mutations within those genes, we generated FI scores for all possible mutations in the 10 significantly mutated genes and compared this distribution to the FI scores for the observed set of mutations within those genes. The observed FI scores were significantly higher than the null distribution of null FI scores, suggesting that the mutations themselves were targeting functional regions within the genes (data not shown).

## Other methods

### ***Publicly available expression and copy number datasets***

Two expression datasets were used. One, from the University of Arkansas (n=414), was derived from newly diagnosed patients with MM<sup>14</sup>. The second, from the Multiple Myeloma Research Consortium (MMRC; n=304), was derived from a mix of newly diagnosed and previously treated patients with MM. Both were obtained using the Affymetrix U133 Plus 2.0 arrays and both are available for download from the Multiple Myeloma Genomics Portal (MMGP; <http://www.broadinstitute.org/mmgp>). The copy number dataset (n=254) is also from the MMRC and is derived from a subset of the same patients contributing to the expression dataset. It was obtained using the Agilent 244K aCGH platform. It is available for download from the MMGP.

### ***Gene set enrichment analysis (GSEA) for FAM46C co-expressed genes***

GSEA was performed using version 2.06 (<http://www.broadinstitute.org/gsea/downloads.jsp>). The gene list was constructed by ranking of Pearson correlation of expression with FAM46C (probe set 226811\_at). The tested datasets were derived from the 639 C2 Canonical Pathways (<http://www.broadinstitute.org/msigdb/index.jsp>). They were filtered for size according to the default settings (range 15-500), yielding 395 genesets. P-values were obtained by permutation (n=100) and adjusted for multiple hypotheses according to the Benjamini-Hochberg procedure for controlling FDR, yielding a q-value.

### ***Outlier sum statistic (OSS) calculation***

A variant of the OSS<sup>15</sup> was used. For calculation of the OSS, samples are divided into two groups and the OSS calculated on a metric in one of the groups. In this case, it was reasoned that it would be informative to look for outlier events occurring in MM samples lacking an obvious driver. Samples were therefore segregated based on presence or absence of a recurrent IgH translocation (targeting one of CCND1, CCND3, FGFR3/WHSC1, MAF, or MAFB), for which expression data can provide an accurate surrogate<sup>16</sup>. Thus segregated, the OSS was applied as described for each probe set in the expression dataset. As the OSS may be driven by both the levels of gene expression in outliers and by the number of outliers, the ranked list of genes was prioritized by a second measure. For this, a permutation test (n=1000) was applied and the observed OSS compared to a null distribution of OSS. Note that this procedure does not yield a p-value, owing to the sparse distribution of outliers in the dataset. Nonetheless, it afforded a useful prioritization of potential driver genes and genes were filtered for a permutation score of less than 0.05. The top 20 hits are shown in Supplementary Table 12. *HOXA9* was ranked number 3 behind a pseudogene (TSPY6P) and a hypothetical protein gene (LOC283352), so was prioritized for further investigation.

The pattern of outlier *HOXA9* expression in MM is shown in Supplementary Figure 4a. Some further explanatory comments are worth making about this figure. Different normalization methods were applied to the raw microarray images in the Arkansas and MMRC/cell line datasets (MAS5 for Arkansas,

robust multi-array analysis – RMA – for MMRC and cell lines). It is likely that this accounts for apparent differences in *HOXA9* outlier expression values between Arkansas and MMRC/cell line datasets. However, the frequency of outliers was the same (10%) in both the Arkansas dataset and the MMRC dataset. The normalized outlier expression values span a very wide range in both datasets and some are expressed only a little higher than the level of noise. Hence these may not be obvious when plotted. However, qPCR of *HOXA9* (Supplementary Fig. 4b; see below) shows ubiquitous expression and the outliers are reliably differentiated from non-outliers by this method. Ubiquitous expression of transcription factors at a level undetectable by microarrays appears to be a common event (unpublished observations based on RNA sequencing).

It will be important to assess correlation between HMT mutation status and *HOXA9* expression. However, there is insufficient power to investigate this relationship. Nevertheless, we would hypothesize that histone modifying gene mutation would drive bi-allelic expression, which is associated with non-outlier status (Supplementary Fig. 4c). In these cases, we do see abnormal H3K27Me3 enrichment (Fig. 3a), which is negatively correlated with expression levels (Fig. 3b). As noted in the main text, outlier status is associated with mono-allelic expression (Supplementary Fig. 4c), which suggests a *cis*-activating mechanism in these cases.

Focal amplifications of the *HOXA* locus are seen in about 5% of patients. Some of these are associated with outlier expression status of *HOXA9*. There are, however, samples with outlier expression and no amplification and *vice versa*. We would speculate that small increases of *HOXA9* achieved by a 1 or 2 copy number gain may be beneficial to MM cells (we do not have sufficient RNA from outlier samples to test this relationship), but that this would be insufficient to drive very high levels of expression. This phenomenon would account for samples with amplification but not outlier expression. On the other hand, a *cis*-activating event might be sufficient to drive high expression and would not require an amplification, accounting for those samples with very high expression but lacking an amplification. For those in which both phenomena are seen, one might expect that a proportion of the samples with a *cis*-activating event would subsequently amplify the affected region as this would provide a further selective advantage.

It will also be important to assess the relationship between histone modifying gene mutations and the histone methyl marks. This is beyond the scope of this study as we do not possess the relevant samples to assess the latter in the patients whose DNA was sequenced. Conversely, establishing mutation status in MM cell lines, in which we do have data on histone methylation status, is not possible with current mutation detection algorithms as these are unable to differentiate private SNPs from somatic mutations in the absence of matched normal DNA.

### ***Cell lines***

The following MM cell lines were used in the study: H929, INA6, JIM3, KMS11, KMS12-BM, KMS12-PE, L363, MM.1S, OPM2, OCI-Mγ5, OCI-Mγ7, SKMM1, U266, and XG6. For allele-specific expression in AML, the cell line MOLM14 was used. All cells were grown in RPMI 1640 media (Fisher Scientific)

supplemented with 10% fetal bovine serum (Sigma Aldrich). Media for INA6 and XG6 were supplemented with 2 ng/ml IL-6 (R and D Systems). Cells were grown at 37°C in 5% CO<sub>2</sub>.

### ***RT-PCR***

As outlined in the main text, a statistically significant collection of mutations was discovered amongst members of the extrinsic clotting pathway. RT-PCR was used to assess whether these coagulation factors were expressed in MM cell lines. F5 expression was not assessed, as F5 is known to be expressed in cells of the lymphocytic lineage. RNA was extracted using a mini-prep kit (Qiagen). DNase digestion was performed if genomic DNA bands subsequently proved problematic. cDNA was produced using a first strand synthesis kit (Promega) and PCR was performed. Forward and reverse primers were designed to different exons so that cDNA and genomic DNA bands could be distinguished. Primer sequences and conditions of the reactions are shown in Supplementary Table 13. Positive control cDNA was obtained from dermal fibroblasts (F3) or whole liver extract (the remainder). An LDHA control was included to ensure approximately equal loading of cDNA. Results are shown in Supplementary Fig. 8.

### ***Assessment of HOXA9 protein expression***

Immunoblotting was performed using an anti-HOXA9 antibody (Millipore). The correct band size was ascertained by reference to published data with the same antibody<sup>17</sup> and by retroviral overexpression of HOXA9. An antibody against  $\beta$ -actin (Cell Signaling Technology) was used as a loading control.

### ***Assessment of HOXA9 mRNA expression***

RNA was extracted from cells using a miniprep kit (Qiagen) according to manufacturer's instructions. First strand synthesis and real-time PCR (RT-qPCR) were performed using a one-step kit on a 7900 thermal cycler and an inventoried probe-primer set, Hs00365956\_m1 (all Applied Biosystems) using the  $\Delta\Delta$ CT protocol, according to the manufacturer's instructions.  $\beta$ -actin (Applied Biosystems) was used as an endogenous loading control. For assessment of basal expression levels, expression was reported relative to that in the lowest expressing cell line (JIM3). For assessment of knock-down, expression was reported relative to that in cells infected with the control hairpin, shLuc. As aberrant patterns of H3K27Me3 enrichment were also seen in the promoters of the *HOXA9* flanking genes (*HOXA7* and *HOXA10*), gene expression of these was assessed by the same method. However, *HOXA7* and *HOXA10* expression was found to be completely absent (data not shown).

### ***Chromatin immunoprecipitation (ChIP) assay for histone 3 lysine 27 trimethyl (H3K27Me3) promoter enrichment***

ChIP was performed as described<sup>18</sup> (also, Adli *et al.*, in preparation).  $\sim 0.5$ - $1.0 \times 10^7$  cells were crosslinked with 1% formaldehyde for 10 minutes at 37°C. Cells were quenched with glycine for 5 minutes and washed twice with ice cold PBS. Cell pellets were re-suspended in 500  $\mu$ l of lysis buffer (1% SDS, 10mM EDTA, 50mM Tris-HCl, pH 8.1) and incubated on ice for 10 minutes. The lysate was diluted by adding 500  $\mu$ l ChIP dilution buffer (0.01% SDS, 1.1% Triton X-100, 1.2mM EDTA, 16.7mM Tris-HCl, pH 8.1). The



chromatin was sonicated for 5 minutes using a Branson 250 sonicator at 40% power amplitude (pulses: 0.7 seconds on, 1.3 seconds off). Chromatin was then immunoprecipitated overnight in a total volume of 10ml ChIP dilution buffer containing protease inhibitor cocktails (Roche) with 10  $\mu$ g H3K27Me3 (Millipore). Enrichment was detected at the *HOXA9* promoter by SYBR Green qPCR (primers: CGCTCTCATTCTCAGCATTG sense; CCACGCTTGACACTCACT antisense).

## ***HOXA9* knock-down**

### **shRNA constructs**

shRNAs cloned into vector pLKO.1 were obtained from The RNAi Consortium (TRC), via Open Biosystems (<http://www.openbiosystems.com/RNAi/shrnaLibraries/>). shRNAs have been named according to the first base targeted in the human cDNA. A shRNA targeting luciferase (shLuc) was used as a negative control. For GFP competition experiments, the puromycin cassette of pLKO.1 was replaced by eGFP by cloning into the BamHI/KpnI sites.

### **Generation of virus for knock-down**

Virus was produced according to TRC protocols (<http://www.broadinstitute.org/rnai/public/resources/protocols>). Briefly, HEK 293T cells were co-transfected with shRNA plasmid and packaging plasmids containing gag, tat, rev, and VSV-G genes. Virus was harvested at 40 hours post-infection, passed through 0.45  $\mu$ m filters, and used fresh for shRNA infection.

### **Assessing degree of *HOXA9* knock-down**

Cells at  $4 \times 10^6$ /ml were infected in 6-well dishes.  $2 \times 10^6$  cells per well were plated with 2 ml fresh virus and Polybrene (hexadimethrine bromide; Sigma Aldrich) to a final concentration of 8  $\mu$ g/ml (1  $\mu$ g/ml for XG6, which was sensitive to higher concentrations). Spinoculation at 750 g for 30 minutes was performed. Media was replaced at 24 hours  $\pm$  puromycin dihydrochloride (Sigma Aldrich) at 2.5  $\mu$ g/ml. Infection efficiencies in excess of 80% were confirmed by comparing viable cell counts in puromycin-selected *versus* non-selected cultures (mock-infected cells ensured efficacy of puromycin). RNA was obtained 72 hours post-infection and cell lysates were obtained at 120 hours post-infection, prior to any hairpin effects on viability being observed. Residual cell cultures were continued for up to 2 weeks to ensure correlation of hairpin effects with effects observed in phenotypic assays. *HOXA9* mRNA and protein was assessed as described above. Degree of knock-down was determined by comparing *HOXA9* expression in response to infection with a particular shRNA *versus* *HOXA9* expression in cells that had been infected with shLuc.

### **Assessing effects of *HOXA9* knockdown**

Cells were plated in replicates in 96-well plate format with fresh virus at multiple titers and Polybrene to a final concentration of 8  $\mu$ g/ml (1  $\mu$ g/ml for XG6). Spinoculation at 900 g for 90 minutes was performed. Media was then immediately refreshed. Cells were assessed at 72 hours on a BD-LSR II flow cytometer



(Becton Dickinson). Dead cells were excluded using a forward-scatter/side-scatter gating strategy that had been determined in a previous optimization experiment using 7-AAD (Becton-Dickinson). Proportion of infected cells was assessed by measuring GFP on a single channel. For each cell line/shRNA combination, replicates from a single titer were selected for further assessment. The titer selected was that which achieved closest to 50% GFP+ cells at 72 hours. GFP+ proportion was then measured every 96 hours for two weeks and expressed relative to the proportion at 72 hours (designated day 0; Fig. 3c and Supplementary Fig. 6). In a separate confirmatory experiment, cells were plated in 96-well format as described above using the minimal viral titer that had been shown to achieve 80% infection efficiency at 72 hours. Cell viability was then assessed at 72 hours (baseline) using CellTiter-Glo (Promega) and at two subsequent time-points (Supplementary Fig. 5 and data not shown).

We note that the levels of mRNA and protein knock-down do not correlate well. This is a frequently observed phenomenon and the levels of protein knock-down are the more important to consider<sup>19</sup>. Nevertheless, there remains some disconnect between the levels of protein knock-down and the severity of the phenotype. Even though many of these hairpins have been previously validated for specific effects in MLL leukemia, including a rescue experiment<sup>17</sup>, it is possible that some exhibit an element of off-target toxicity. Nevertheless, it is highly unlikely that all of the effects of all of the hairpins are non-specific. Importantly, no hairpin was found that knocked down HOXA9 and which had no effect on MM cell line viability.

### ***Determination of DIS3 and FAM46C mutation status in cell lines***

To identify suitable models for future functional characterization of DIS3 and FAM46C mutations, we determined the mutation status in several MM cell lines. For DIS3, we only examined the catalytic RNB domain, in which we had observed all the mutations in the primary patient samples. We performed PCR on cDNA (DIS3) or genomic DNA (FAM46C) with tiled primer pairs (primer sequences and reaction conditions in Supplementary Table 14). We then performed Sanger sequencing using the same primers. 2/15 tested cell lines had point mutations in the DIS3 RNB domain (Supplementary Table 15). Both mutations were associated with loss of the other allele *via* chromosome 13 deletion. 4/16 tested cell lines had mutations in FAM46C (Supplementary Table 16). Two were point mutations and two were indels resulting in a frame-shift. 3/4 mutations were associated with loss of the other allele *via* 1p deletion. A fifth FAM46C mutation in an additional cell line (LP1) was identified by examining 244K aCGH profiles of MM cell lines (Supplementary Table 16). This comprised focal bi-allelic loss of the 5' end of the gene and was associated with absent FAM46C expression (FAM46C is otherwise ubiquitously expressed in MM). These data suggest that the FAM46C mutations result in loss of function.

## **References**

1. Gnirke, A., et al. Solution hybrid selection with ultra-long oligonucleotides for massively parallel targeted sequencing. *Nat Biotechnol.* **27**, 182-9 (2009).
2. Ewing, B., et al. Base-calling of automated sequencer traces using phred. I. Accuracy assessment. *Genome Res.* **8**, 175-85 (1998).

3. Li, H., Ruan, J., and Durbin, R. Mapping short DNA sequencing reads and calling variants using mapping quality scores. *Genome Res.* **18**, 1851-8 (2008).
4. Reich, M., et al. GenePattern 2.0. *Nat Genet.* **38**, 500-1 (2006).
5. Korn, J.M., et al. Integrated genotype calling and association analysis of SNPs, common copy number polymorphisms and rare CNVs. *Nat Genet.* **40**, 1253-60 (2008).
6. Rhead, B., et al. The UCSC Genome Browser database: update 2010. *Nucleic Acids Res.* **38**, D613-9
7. Ding, L., et al. Somatic mutations affect key pathways in lung adenocarcinoma. *Nature.* **455**, 1069-75 (2008).
8. Comprehensive genomic characterization defines human glioblastoma genes and core pathways. *Nature.* **455**, 1061-8 (2008).
9. Getz, G., et al. Comment on "The consensus coding sequences of human breast and colorectal cancers". *Science.* **317**, 1500 (2007).
10. King, D.C., et al. Evaluation of regulatory potential and conservation scores for detecting cis-regulatory modules in aligned mammalian genome sequences. *Genome Res.* **15**, 1051-60 (2005).
11. Kolbe, D., et al. Regulatory potential scores from genome-wide three-way alignments of human, mouse, and rat. *Genome Res.* **14**, 700-7 (2004).
12. Migliazza, A., et al. Frequent somatic hypermutation of the 5' noncoding region of the BCL6 gene in B-cell lymphoma. *Proc Natl Acad Sci U S A.* **92**, 12520-4 (1995).
13. Reva, B., Antipin, Y., and Sander, C. Determinants of protein function revealed by combinatorial entropy optimization. *Genome Biol.* **8**, R232 (2007).
14. Zhan, F., et al. The molecular classification of multiple myeloma. *Blood.* **108**, 2020-8 (2006).
15. Tibshirani, R. and Hastie, T. Outlier sums for differential gene expression analysis. *Biostatistics.* **8**, 2-8 (2007).
16. Bergsagel, P.L. and Kuehl, W.M. Molecular pathogenesis and a consequent classification of multiple myeloma. *J Clin Oncol.* **23**, 6333-8 (2005).
17. Faber, J., et al. HOXA9 is required for survival in human MLL-rearranged acute leukemias. *Blood.* **113**, 2375-85 (2009).
18. Ku, M., et al. Genomewide analysis of PRC1 and PRC2 occupancy identifies two classes of bivalent domains. *PLoS Genet.* **4**, e1000242 (2008).
19. Sahin, O., et al. Combinatorial RNAi for quantitative protein network analysis. *Proc Natl Acad Sci U S A.* **104**, 6579-84 (2007).

| Sample ID | Age at Diagnosis | Gender | Race                       | Heavy chain class | Light chain class | Hyperdiploidy (HD) and/or IgH translocation |                      | Treatment status | Sequencing method |
|-----------|------------------|--------|----------------------------|-------------------|-------------------|---------------------------------------------|----------------------|------------------|-------------------|
|           |                  |        |                            |                   |                   | Other cytogenetics                          |                      |                  |                   |
| MMRC0004  | 36               | Male   | Caucasian                  | IgG               | Kappa             |                                             |                      | Untreated        | WE                |
| MMRC0028  | 44               | Male   | Caucasian                  | IgG               | Not available     | t(4;14)                                     | del 13q14            | Untreated        | WE                |
| MMRC0173  | 41               | Female | Asian African American     | Not available     | Not available     | HD                                          | del 13q14            | Treated          | WGS               |
| MMRC0191  | 56               | Female | American                   | IgG               | Lambda            | HD                                          |                      | Treated          | Both              |
| MMRC0216  | 59               | Female | Caucasian                  | Cannot assign     | Kappa             | HD                                          |                      | Untreated        | WE                |
| MMRC0242  | 71               | Male   | Hispanic                   | IgG               | Lambda            | Not available                               | del 13q14            | Treated          | WGS               |
| MMRC0244  | 56               | Female | Caucasian                  | IgG               | Kappa             | HD                                          |                      | Untreated        | WE                |
| MMRC0282  | 60               | Male   | Caucasian                  | Not detected      | Kappa             | HD                                          | del 13q14            | Treated          | WE                |
| MMRC0284  | 41               | Male   | Caucasian                  | Cannot assign     | Kappa             | t(11;14)                                    |                      | Untreated        | WE                |
| MMRC0286  | 50               | Female | Caucasian                  | IgA               | Kappa             | t(14;16)                                    | del 13q14            | Untreated        | WE                |
| MMRC0308  | 55               | Female | Caucasian                  | IgG               | Lambda            | t(4;14)                                     | del 13q14            | Treated          | WE                |
| MMRC0309  | 61               | Male   | Caucasian                  | IgA               | Lambda            | t(14;16)                                    | del 13q14            | Untreated        | WGS               |
| MMRC0319  | 55               | Male   | Caucasian                  | IgM               | Kappa             | HD; t(4;14)                                 |                      | Untreated        | WGS               |
| MMRC0322  | 69               | Male   | Caucasian                  | IgG               | Kappa             | Not available                               | del 13q14            | Untreated        | WE                |
| MMRC0329  | 37               | Female | Caucasian                  | IgG               | Kappa             | HD                                          | del 13q14**          | Treated          | WE                |
| MMRC0332  | 66               | Male   | Caucasian                  | IgG               | Lambda            | HD; t(4;14)                                 |                      | Treated          | WGS               |
| MMRC0335  | 56               | Male   | Caucasian                  | IgA               | Kappa             | t(11;14)                                    |                      | Treated          | WGS               |
| MMRC0338  | 63               | Male   | Caucasian                  | IgG               | Kappa             | Not available                               |                      | Untreated        | WGS               |
| MMRC0343  | 62               | Male   | Caucasian                  | Not detected      | Kappa             | t(11;14)                                    | del 13q14; del 17p13 | Treated          | WGS               |
| MMRC0344  | 69               | Female | Caucasian                  | IgG               | Lambda            | Not available                               |                      | Treated          | WGS               |
| MMRC0347  | 58               | Male   | Caucasian                  | IgG               | Lambda            | t(11;14)                                    | del 17p13            | Untreated        | WE                |
| MMRC0356  | 52               | Male   | Hispanic                   | IgG               | Kappa             | HD; t(11;14)*                               | del 13q14            | Untreated        | WGS               |
| MMRC0359  | 63               | Male   | Caucasian                  | IgG               | Kappa             | t(11;14)                                    | del 13q14; del 1p32  | Untreated        | WE                |
| MMRC0375  | 72               | Male   | Caucasian                  | IgA               | Kappa             | t(11;14)                                    | del 13q14            | Treated          | WGS               |
| MMRC0376  | 56               | Male   | Caucasian                  | IgA               | Kappa             | t(4;14)                                     | del 13q14            | Untreated        | WGS               |
| MMRC0381  | 72               | Male   | Caucasian                  | IgG               | Kappa             | HD                                          | del 13q14            | Untreated        | WE                |
| MMRC0383  | 69               | Male   | Caucasian                  | IgG               | Kappa             | t(11;14)                                    | del 13q14            | Treated          | WGS               |
| MMRC0387  | 60               | Female | Caucasian                  | IgG               | Kappa             | HD                                          |                      | Untreated        | WGS               |
| MMRC0389  | 37               | Male   | Caucasian                  | IgE               | Kappa             | HD; t(14;20)                                | del 13q14            | Treated          | WGS               |
| MMRC0390  | 71               | Female | Caucasian                  | IgG               | Lambda            | t(11;14)                                    |                      | Treated          | WGS               |
| MMRC0392  | 59               | Male   | Caucasian                  | IgG               | Lambda            | HD; t(6;14)                                 | del 13q14            | Treated          | WGS               |
| MMRC0406  | 59               | Female | Caucasian                  | IgA               | Kappa             | HD                                          |                      | Untreated        | WGS               |
| MMRC0408  | 58               | Male   | Caucasian                  | IgA               | Lambda            | HD                                          | del 1p32**           | Untreated        | WGS               |
| MMRC0412  | 49               | Male   | Caucasian                  | IgG               | Kappa             | HD                                          | del 1p32             | Treated          | WGS               |
| MMRC0421  | 45               | Male   | Caucasian African American | IgA               | Not available     | t(4;14)                                     |                      | Treated          | WGS               |
| MMRC0423  | 51               | Male   | American                   | IgA               | Kappa             |                                             |                      | Treated          | WE                |
| MMRC0425  | 65               | Female | Caucasian                  | IgG               | Kappa             | Not available                               |                      | Untreated        | WGS               |
| MMRC0427  | 62               | Male   | Other                      | IgG               | Lambda            | t(11;14)                                    | del 13q14            | Treated          | WE                |

\*Spiked CCND1 expression absent, despite t(11;14)

\*\* Focal bi-allelic deletion at *CDKN2C* or *RB1*

**Supplementary Table 1 – Clinical characteristics of patients providing samples for sequencing.** Hyperdiploidy and IgH translocations were determined by FISH and/or aCGH and/or gene expression profiles. Treatment status refers to whether the patient had received treatment at the time of sample donation.

|                                             | <u>Whole Genome (n = 23)</u> |             | <u>Whole Exome (n = 16)</u> |             | <u>Total (n = 39)</u> |             |
|---------------------------------------------|------------------------------|-------------|-----------------------------|-------------|-----------------------|-------------|
|                                             | Total                        | Mean        | Total                       | Mean        | Total                 | Mean        |
| <b><u>Nonsynonymous point mutations</u></b> |                              |             |                             |             |                       |             |
| Missense                                    | 721                          | 31.3        | 416                         | 26.1        | 1141                  | 29.3        |
| Nonsense                                    | 49                           | 2.1         | 25                          | 1.6         | 74                    | 1.9         |
| Splice site                                 | 22                           | 1.0         | 7                           | 0.4         | 29                    | 0.7         |
| Read-through                                | 1                            | 0.04        | 0                           | 0           | 1                     | 0.03        |
|                                             | <b>793</b>                   | <b>34.6</b> | <b>448</b>                  | <b>28.1</b> | <b>1245</b>           | <b>31.9</b> |
| <b><u>Small indels</u></b>                  |                              |             |                             |             |                       |             |
| Frame-shift deletion                        | 5                            | 0.2         | 4                           | 0.3         | 9                     | 0.2         |
| In-frame deletion                           | 5                            | 0.2         | 2                           | 0.1         | 7                     | 0.2         |
| Frame-shift insertion                       | 2                            | 0.09        | 2                           | 0.1         | 4                     | 0.1         |
| In-frame insertion                          | 1                            | 0.04        | 0                           | 0           | 1                     | 0.03        |
|                                             | <b>13</b>                    | <b>0.6</b>  | <b>8</b>                    | <b>0.5</b>  | <b>21</b>             | <b>0.5</b>  |
| <b><u>Larger rearrangements</u></b>         |                              |             |                             |             |                       |             |
| Translocations                              | 204                          | 8.7         | N/A                         |             | N/A                   |             |
| Deletions                                   | 105                          | 4.6         | N/A                         |             | N/A                   |             |
| Insertions                                  | 23                           | 1.0         | N/A                         |             | N/A                   |             |
| Tandem duplications                         | 32                           | 1.4         | N/A                         |             | N/A                   |             |
| Long-range                                  | 78                           | 3.4         | N/A                         |             | N/A                   |             |
| Complex                                     | 33                           | 1.4         | N/A                         |             | N/A                   |             |
|                                             | <b>475</b>                   | <b>20.7</b> |                             |             |                       |             |

**Supplementary Table 2 – Somatic events disrupting protein-coding regions.** Only rearrangements with a breakpoint resulting in the disruption of protein coding are included. Long-range events are those with breakpoints separated by more than 1 Mb. Complex rearrangements are those involving two or more separate events.

| Gene     | Chr | Position (strand) | 2nd gene | Chr | Position (strand) | Type                 | AA change   | Sample   | Previously treated |
|----------|-----|-------------------|----------|-----|-------------------|----------------------|-------------|----------|--------------------|
| A2M      | 12  | 9139481           |          |     |                   | Missense             | R645H       | MMRC0332 | Treated            |
| AADAT    | 4   | 171219720         |          |     |                   | Splice site          | V379_splice | MMRC0427 | Treated            |
| AASS     | 7   | 121528670         |          |     |                   | Missense             | R466Q       | MMRC0392 | Treated            |
| ABCA12   | 2   | 215583394         |          |     |                   | Missense             | A793D       | MMRC0322 | Untreated          |
| ABCA12   | 2   | 215532039         |          |     |                   | Missense             | M1965L      | MMRC0356 | Untreated          |
| ABCA13   | 7   | 48362407          |          |     |                   | Missense             | R3435W      | MMRC0191 | Treated            |
| ABCC1    | 16  | 16020092(+)       | PRKCB    | 16  | 23931585(-)       | Long range           |             | MMRC0344 | Treated            |
| ABCE1    | 4   | 146260624         |          |     |                   | Missense             | N338S       | MMRC0381 | Untreated          |
| ACAD11   | 3   | 133858909(+)      | NPHP3    | 3   | 133885257(-)      | Deletion             |             | MMRC0191 | Treated            |
| ACAD9    | 3   | 130096876         |          |     |                   | Missense             | R127K       | MMRC0389 | Treated            |
| ACBD3    | 1   | 224439435(-)      |          | 1   | 224458761(+)      | Tandem duplication   |             | MMRC0421 | Treated            |
| ACBD5    | 10  | 27537271          |          |     |                   | Missense             | E403D       | MMRC0389 | Treated            |
| ACOXL    | 2   | 111315566(-)      |          | 23  | 105246739(-)      | Translocation        |             | MMRC0191 | Treated            |
| ACTL6A   | 3   | 180770623         |          |     |                   | Missense             | D17E        | MMRC0425 | Untreated          |
| ACTN3    | 11  | 66086153          |          |     |                   | Missense             | A754T       | MMRC0412 | Treated            |
| ACTRT1   | X   | 127013232         |          |     |                   | Missense             | V212A       | MMRC0191 | Treated            |
| ADAD1    | 4   | 123561875         |          |     |                   | Missense             | F488L       | MMRC0376 | Untreated          |
| ADAM17   | 2   | 9562800           |          |     |                   | Frame shift deletion | G486fs      | MMRC0427 | Treated            |
| ADAM17   | 2   | 9585504           |          |     |                   | Missense             | D161N       | MMRC0191 | Treated            |
| ADAM18   | 8   | 39610001(+)       |          | 8   | 40122511(-)       | Deletion             |             | MMRC0332 | Treated            |
| ADAM18   | 8   | 39644716          |          |     |                   | Missense             | E457K       | MMRC0338 | Untreated          |
| ADAM22   | 7   | 87405341(+)       |          | 7   | 93095395(+)       | Long range           |             | MMRC0425 | Untreated          |
| ADAM29   | 4   | 176134318         |          |     |                   | Missense             | M356T       | MMRC0425 | Untreated          |
| ADAM9    | 8   | 38984621          |          |     |                   | Missense             | R53G        | MMRC0347 | Untreated          |
| ADAMTS1  | 21  | 27134136          |          |     |                   | Missense             | G594A       | MMRC0387 | Untreated          |
| ADAMTS18 | 16  | 75947338          |          |     |                   | Missense             | S487I       | MMRC0191 | Treated            |
| ADAMTS19 | 5   | 128960221         |          |     |                   | Missense             | N475K       | MMRC0332 | Treated            |
| ADAMTS2  | 5   | 178602608(+)      |          | 5   | 178711536(-)      | Deletion             |             | MMRC0408 | Untreated          |
| ADAMTS20 | 12  | 42063959          |          |     |                   | Missense             | D1514G      | MMRC0335 | Treated            |
| ADAMTS8  | 11  | 129781224         |          |     |                   | Nonsense             | Y703*       | MMRC0191 | Treated            |
| ADAMTS9  | 3   | 64555038          |          |     |                   | Missense             | R1431H      | MMRC0425 | Untreated          |
| ADAMTS9  | 3   | 64594464          |          |     |                   | Missense             | N663T       | MMRC0425 | Untreated          |
| ADAMTSL1 | 9   | 18896858          |          |     |                   | Missense             | W1710C      | MMRC0332 | Treated            |
| ADAMTSL3 | 15  | 82357635          |          |     |                   | Missense             | G497R       | MMRC0329 | Treated            |
| ADCY2    | 5   | 7810576           |          |     |                   | Missense             | K657N       | MMRC0375 | Treated            |
| ADCY2    | 5   | 7837525           |          |     |                   | Missense             | S811F       | MMRC0412 | Treated            |
| ADNP     | 20  | 48942218          |          |     |                   | Missense             | D814N       | MMRC0282 | Treated            |
| ADNP2    | 18  | 75995981          |          |     |                   | Missense             | L565S       | MMRC0319 | Untreated          |
| AFAP1    | 4   | 7827366           |          |     |                   | Missense             | G604S       | MMRC0387 | Untreated          |
| AFAP1L1  | 3   | 143784143(+)      |          | 5   | 148692173(-)      | Translocation        |             | MMRC0191 | Treated            |
| AFF1     | 4   | 88085017(+)       |          | 4   | 88133105(-)       | Deletion             |             | MMRC0332 | Treated            |
| AFG3L2   | 18  | 12341180          |          |     |                   | Missense             | I486V       | MMRC0309 | Untreated          |
| AGAP2    | 12  | 56414108          |          |     |                   | Missense             | G506E       | MMRC0389 | Treated            |
| AGBL4    | 1   | 49116754(+)       |          | 1   | 76244110(-)       | Long range           |             | MMRC0412 | Treated            |
| AHNAK2   | 5   | 128274788(+)      |          | 14  | 104511997(-)      | Translocation        |             | MMRC0191 | Treated            |
| AIM1L    | 1   | 26536734          |          |     |                   | Missense             | P131T       | MMRC0376 | Untreated          |
| AKAP6    | 14  | 32085771          |          |     |                   | Missense             | L721I       | MMRC0347 | Untreated          |
| AKAP6    | 14  | 32084721          |          |     |                   | Nonsense             | R371*       | MMRC0406 | Untreated          |
| AKR1B15  | 7   | 133903503         |          |     |                   | Nonsense             | Y40*        | MMRC0408 | Untreated          |
| ALCAM    | 3   | 106653896(+)      |          | 3   | 155190940(-)      | Long range           |             | MMRC0191 | Treated            |
| ALCAM    | 3   | 106606779(-)      |          | 5   | 96552937(-)       | Translocation        |             | MMRC0375 | Treated            |
| ALDH1A2  | 15  | 56122206(-)       |          | 17  | 50044110(+)       | Translocation        |             | MMRC0191 | Treated            |
| ALDH1L1  | 3   | 127356171         |          |     |                   | Missense             | N212K       | MMRC0319 | Untreated          |
| ALDH1L2  | 12  | 103983243         |          |     |                   | Missense             | E240K       | MMRC0344 | Treated            |
| ALMS1    | 2   | 73533019          |          |     |                   | Missense             | Q1952K      | MMRC0412 | Treated            |
| ALOX12B  | 17  | 7919747           |          |     |                   | Missense             | E515D       | MMRC0392 | Treated            |
| ALOX12B  | 17  | 7920252           |          |     |                   | Missense             | D500N       | MMRC0392 | Treated            |
| ALOX12B  | 17  | 7924355           |          |     |                   | Missense             | L226P       | MMRC0173 | Treated            |
| ALOX12B  | 17  | 7916890(+)        | SLC37A1  | 21  | 42832836(+)       | Translocation        |             | MMRC0392 | Treated            |
| ALOX15B  | 17  | 7884260(-)        | MYH10    | 17  | 8412781(-)        | Inversion            |             | MMRC0392 | Treated            |
| ALOX15B  | 17  | 7884094(+)        | PIGL     | 17  | 16114874(+)       | Long range           |             | MMRC0392 | Treated            |
| ALOXE3   | 17  | 7950718(-)        | NTN1     | 17  | 8927833(-)        | Inversion            |             | MMRC0392 | Treated            |
| ALOXE3   | 17  | 7951129(+)        | SLC37A1  | 21  | 42833530(-)       | Translocation        |             | MMRC0392 | Treated            |
| ALPK2    | 18  | 54387075(+)       |          | 18  | 54415713(-)       | Deletion             |             | MMRC0319 | Untreated          |
| AMT      | 3   | 49431460          |          |     |                   | Missense             | N275K       | MMRC0392 | Treated            |
| ANGPTL5  | 11  | 101276446         |          |     |                   | Nonsense             | Q196*       | MMRC0344 | Treated            |
| ANK2     | 4   | 114190342         |          |     |                   | Missense             | N3K         | MMRC0329 | Treated            |
| ANK2     | 4   | 114488891         |          |     |                   | Missense             | S1461L      | MMRC0389 | Treated            |
| ANK2     | 4   | 114494274         |          |     |                   | Missense             | P1684Q      | MMRC0389 | Treated            |

**Supplementary Table 3 – All somatic mutations qualitatively affecting protein coding.** Included are point mutations, small indels, and larger rearrangements with breakpoints within genes. Complex rearrangements (as detailed in figure 1b) have been expanded into individual events.

| Gene     | Chr | Position (strand) | 2nd gene | Chr | Position (strand) | Type                  | AA change | Sample   | Previously treated |
|----------|-----|-------------------|----------|-----|-------------------|-----------------------|-----------|----------|--------------------|
| ANKRD30A | 10  | 37548386          |          |     |                   | Missense              | E1191A    | MMRC0242 | Treated            |
| ANKRD30A | 10  | 37476319          |          |     |                   | Missense              | S435P     | MMRC0389 | Treated            |
| ANKRD50  | 4   | 125811674         |          |     |                   | Missense              | D736E     | MMRC0390 | Treated            |
| ANKRD57  | 2   | 109730452         |          |     |                   | Missense              | A366V     | MMRC0359 | Untreated          |
| ANO3     | 11  | 26503799          |          |     |                   | Missense              | G245V     | MMRC0421 | Treated            |
| ANO6     | 12  | 43982136          |          |     |                   | Missense              | P48L      | MMRC0338 | Untreated          |
| ANTXR2   | 4   | 81016850(+)       |          | 4   | 81067994(-)       | Deletion              |           | MMRC0191 | Treated            |
| ANXA13   | 8   | 124766077         |          |     |                   | Missense              | G262E     | MMRC0421 | Treated            |
| ANXA2    | 15  | 58433523(+)       |          | 15  | 58451240(-)       | Deletion              |           | MMRC0376 | Untreated          |
| ANXA2    | 15  | 58431220          |          |     |                   | Missense              | N258S     | MMRC0421 | Treated            |
| AP1M1    | 19  | 16199994          |          |     |                   | Missense              | H288P     | MMRC0191 | Treated            |
| APOH     | 17  | 61641168          |          |     |                   | Missense              | Q283E     | MMRC0389 | Treated            |
| AQP7     | 9   | 33375852          |          |     |                   | Missense              | G180R     | MMRC0375 | Treated            |
| ARHGAP15 | 2   | 142931546(+)      |          | 2   | 143720455(-)      | Deletion              |           | MMRC0389 | Treated            |
| ARHGAP26 | 5   | 142220883(-)      |          | 16  | 66403657(+)       | Translocation         |           | MMRC0425 | Untreated          |
| ARHGEF10 | 8   | 1830101           |          |     |                   | Missense              | E466K     | MMRC0387 | Untreated          |
| ARHGEF15 | 17  | 8163084           |          |     |                   | Missense              | R690C     | MMRC0392 | Treated            |
| ARHGEF3  | 3   | 56764144          |          |     |                   | Frame shift insertion | P99fs     | MMRC0381 | Untreated          |
| ARID1A   | 1   | 26967029          |          |     |                   | Missense              | D1050E    | MMRC0356 | Untreated          |
| ARID2    | 12  | 44540952          |          |     |                   | Missense              | M1625I    | MMRC0286 | Untreated          |
| ARID3C   | 9   | 34613427          |          |     |                   | Missense              | K287M     | MMRC0319 | Untreated          |
| ARID4A   | 14  | 57842916(+)       | KIAA0586 | 14  | 58046228(-)       | Deletion              |           | MMRC0319 | Untreated          |
| ARL15    | 5   | 53635635(+)       |          | 14  | 55603989(-)       | Translocation         |           | MMRC0191 | Treated            |
| ARMC9    | 2   | 231835342         |          |     |                   | Missense              | Y369F     | MMRC0282 | Treated            |
| ARNTL2   | 12  | 27412578          |          |     |                   | Nonsense              | R50*      | MMRC0028 | Untreated          |
| ARPP-21  | 3   | 35700306          |          |     |                   | Missense              | D86Y      | MMRC0338 | Untreated          |
| ARRDC1   | 9   | 139629369         |          |     |                   | Missense              | Q420H     | MMRC0286 | Untreated          |
| ASB15    | 7   | 123057383         |          |     |                   | Missense              | E523G     | MMRC0242 | Treated            |
| ASH1L    | 1   | 153715219         |          |     |                   | Missense              | KM1355>NL | MMRC0412 | Treated            |
| ASH1L    | 1   | 153580068         |          |     |                   | Nonsense              | R2691*    | MMRC0381 | Untreated          |
| ASH2L    | 8   | 38091659          |          |     |                   | Missense              | F254S     | MMRC0329 | Treated            |
| ASNS     | 7   | 97320361          |          |     |                   | Missense              | T475A     | MMRC0335 | Treated            |
| ASPM     | 1   | 195328870         |          |     |                   | Missense              | I3077F    | MMRC0383 | Treated            |
| ATAD3A   | 1   | 1445795           |          |     |                   | Missense              | A277P     | MMRC0375 | Treated            |
| ATG2A    | 11  | 64431333          |          |     |                   | Missense              | K934N     | MMRC0173 | Treated            |
| ATG7     | 3   | 11447811(-)       | AATK     | 17  | 76734959(+)       | Translocation         |           | MMRC0387 | Untreated          |
| ATM      | 11  | 107629789         |          |     |                   | Nonsense              | S646*     | MMRC0191 | Treated            |
| ATOH1    | 4   | 94970059          |          |     |                   | Missense              | L320S     | MMRC0309 | Untreated          |
| ATOH8    | 2   | 85835519          |          |     |                   | Missense              | R232S     | MMRC0427 | Treated            |
| ATP10B   | 5   | 159982131         |          |     |                   | Missense              | V554I     | MMRC0335 | Treated            |
| ATP1A4   | 1   | 158411149         |          |     |                   | Missense              | G767R     | MMRC0244 | Untreated          |
| ATP2C1   | 3   | 131545181(-)      |          | 3   | 132163563(+)      | Tandem duplication    |           | MMRC0425 | Untreated          |
| ATP4B    | 13  | 113351788         |          |     |                   | Missense              | A260T     | MMRC0406 | Untreated          |
| ATP6VOA1 | 1   | 224308027(-)      |          | 17  | 37879120(-)       | Translocation         |           | MMRC0425 | Untreated          |
| ATP6V1C2 | 2   | 10835279          |          |     |                   | Missense              | E315Q     | MMRC0392 | Treated            |
| ATP7B    | 8   | 68849483(-)       |          | 13  | 51448093(+)       | Translocation         |           | MMRC0319 | Untreated          |
| ATP8B4   | 15  | 47999826          |          |     |                   | Missense              | W611S     | MMRC0242 | Treated            |
| ATP9A    | 20  | 49815595(-)       | SALL4    | 20  | 49839479(-)       | Inversion             |           | MMRC0332 | Treated            |
| AUTS2    | 7   | 69233117(+)       |          | 7   | 69445909(-)       | Deletion              |           | MMRC0332 | Treated            |
| AXIN2    | 17  | 60899765(+)       |          | 17  | 60975400(-)       | Deletion              |           | MMRC0421 | Treated            |
| AXL      | 19  | 46454269          |          |     |                   | Nonsense              | Y694*     | MMRC0335 | Treated            |
| AXL      | 19  | 46454269          |          |     |                   | Nonsense              | Y694*     | MMRC0343 | Treated            |
| B3GALTL  | 13  | 30725160(+)       |          | 13  | 30767593(-)       | Deletion              |           | MMRC0412 | Treated            |
| B4GALNT4 | 11  | 369940            |          |     |                   | Missense              | R855C     | MMRC0381 | Untreated          |
| BACE2    | 17  | 12270501(+)       |          | 21  | 41533322(-)       | Translocation         |           | MMRC0392 | Treated            |
| BAG4     | 8   | 34928411(-)       |          | 8   | 38161702(-)       | Long range            |           | MMRC0412 | Treated            |
| BAIAP2L1 | 7   | 97766488(+)       |          | 15  | 60584713(-)       | Translocation         |           | MMRC0191 | Treated            |
| BAZ2B    | 2   | 159890491         |          |     |                   | Missense              | S2043Y    | MMRC0332 | Treated            |
| BCAN     | 1   | 154886150(+)      |          | 1   | 154902665(+)      | Inversion             |           | MMRC0242 | Treated            |
| BCAP29   | 7   | 107046037         |          |     |                   | Missense              | R240T     | MMRC0191 | Treated            |
| BCAS4    | 20  | 48891729          |          |     |                   | Missense              | G125E     | MMRC0329 | Treated            |
| BCKDHB   | 6   | 80937777          |          |     |                   | Missense              | D231E     | MMRC0344 | Treated            |
| BICC1    | 10  | 60228971          |          |     |                   | Nonsense              | Q560*     | MMRC0335 | Treated            |
| BLMH     | 17  | 25586084(+)       |          | 17  | 25605465(-)       | Deletion              |           | MMRC0191 | Treated            |
| BMP6     | 6   | 7615208(-)        |          | 6   | 7699953(+)        | Tandem duplication    |           | MMRC0406 | Untreated          |
| BMS1     | 10  | 42632094          |          |     |                   | Missense              | V791M     | MMRC0387 | Untreated          |
| BRAF     | 7   | 140127871         |          |     |                   | Missense              | G469A     | MMRC0344 | Treated            |
| BRCA1    | 17  | 38510440          |          |     |                   | Missense              | C44F      | MMRC0344 | Treated            |
| BRE      | 2   | 28408035(-)       | C11orf65 | 11  | 107817836(+)      | Translocation         |           | MMRC0191 | Treated            |

Supplementary Table 3 (continued)

| Gene      | Chr | Position (strand) | 2nd gene  | Chr | Position (strand) | Type                  | AA change   | Sample   | Previously treated |
|-----------|-----|-------------------|-----------|-----|-------------------|-----------------------|-------------|----------|--------------------|
| BSN       | 3   | 49664376          |           |     |                   | Nonsense              | E795*       | MMRC0332 | Treated            |
| BTBD11    | 12  | 106533023         |           |     |                   | Missense              | T652M       | MMRC0282 | Treated            |
| BTBD7     | 14  | 92830943          |           |     |                   | Missense              | R59K        | MMRC0322 | Untreated          |
| BTLA      | 3   | 113667901         |           |     |                   | Missense              | S157T       | MMRC0191 | Treated            |
| BTRC      | 10  | 103288069         |           |     |                   | Missense              | A536G       | MMRC0286 | Untreated          |
| C10orf111 | 10  | 15178691          |           |     |                   | Missense              | S47R        | MMRC0282 | Treated            |
| C10orf118 | 10  | 115881059         |           |     |                   | Missense              | E646D       | MMRC0004 | Untreated          |
| C10orf72  | 10  | 49971922(+)       | C10orf128 | 10  | 50039012(-)       | Deletion              |             | MMRC0335 | Treated            |
| C10orf84  | 10  | 120054455(+)      |           | 10  | 120064906(-)      | Deletion              |             | MMRC0191 | Treated            |
| C10orf96  | 10  | 118101377(+)      | PNLIPRP3  | 10  | 118197108(-)      | Deletion              |             | MMRC0344 | Treated            |
| C11orf24  | 11  | 67786495          |           |     |                   | Missense              | A182T       | MMRC0216 | Untreated          |
| C11orf61  | 11  | 124142701         |           |     |                   | Missense              | G369R       | MMRC0412 | Treated            |
| C11orf90  | 11  | 90014673(-)       |           | 11  | 93215404(-)       | Long range            |             | MMRC0338 | Untreated          |
| C12orf11  | 12  | 12928113(-)       |           | 12  | 26956842(-)       | Long range            |             | MMRC0421 | Treated            |
| C12orf11  | 12  | 26957771          |           |     |                   | Missense              | P564L       | MMRC0421 | Treated            |
| C12orf30  | 12  | 110994115         |           |     |                   | Nonsense              | R335*       | MMRC0282 | Treated            |
| C12orf35  | 12  | 32026928          |           |     |                   | Missense              | A591V       | MMRC0335 | Treated            |
| C13orf30  | 13  | 42256206          |           |     |                   | Missense              | M1I         | MMRC0347 | Untreated          |
| C14orf43  | 1   | 46481870(-)       |           | 14  | 73270266(+)       | Translocation         |             | MMRC0191 | Treated            |
| C15orf55  | 8   | 57009317(+)       |           | 15  | 32431688(-)       | Translocation         |             | MMRC0335 | Treated            |
| C16orf91  | 16  | 1416310           |           |     |                   | Missense              | P105Q       | MMRC0392 | Treated            |
| C17orf46  | 17  | 40693261(-)       | PRPSAP1   | 17  | 71851808(+)       | Long range            |             | MMRC0425 | Untreated          |
| C17orf68  | 17  | 8082189(-)        | MYH10     | 17  | 8406630(-)        | Inversion             |             | MMRC0392 | Treated            |
| C17orf68  | 17  | 8072916           |           |     |                   | Missense              | T1081A      | MMRC0322 | Untreated          |
| C17orf71  | 17  | 54642550          |           |     |                   | Missense              | S119T       | MMRC0244 | Untreated          |
| C18orf19  | 18  | 13671976          |           |     |                   | Missense              | G34A        | MMRC0389 | Treated            |
| C19orf33  | 19  | 43487387          |           |     |                   | In frame deletion     | V88_K89>V   | MMRC0412 | Treated            |
| C1orf101  | 1   | 242790743         |           |     |                   | Missense              | V394F       | MMRC0242 | Treated            |
| C1orf14   | 1   | 181175260         |           |     |                   | Missense              | E274D       | MMRC0343 | Treated            |
| C1orf14   | 1   | 181135742         |           |     |                   | Read-through          | *654L       | MMRC0383 | Treated            |
| C1orf163  | 1   | 52926231          |           |     |                   | Frame shift insertion | S148fs      | MMRC0286 | Untreated          |
| C1orf26   | 1   | 183410506         |           |     |                   | Missense              | V202F       | MMRC0375 | Treated            |
| C1orf64   | 1   | 16201730(-)       |           | 1   | 16203618(-)       | Inversion             |             | MMRC0406 | Untreated          |
| C1orf95   | 1   | 224830735(+)      |           | 22  | 21558309(+)       | Translocation         |             | MMRC0425 | Untreated          |
| C20orf107 | 20  | 54541893          |           |     |                   | Missense              | S30N        | MMRC0408 | Untreated          |
| C20orf117 | 20  | 34887558(+)       | SAMHD1    | 20  | 34974001(-)       | Deletion              |             | MMRC0387 | Untreated          |
| C20orf117 | 20  | 34899889(-)       | SAMHD1    | 20  | 34961798(+)       | Tandem duplication    |             | MMRC0356 | Untreated          |
| C20orf132 | 20  | 35182854          |           |     |                   | Splice site           | C659_splice | MMRC0412 | Treated            |
| C20orf152 | 20  | 34031821          |           |     |                   | Missense              | Q90H        | MMRC0359 | Untreated          |
| C20orf194 | 20  | 3199122           |           |     |                   | Missense              | A913P       | MMRC0383 | Treated            |
| C20orf20  | 20  | 60901255          |           |     |                   | Missense              | F144L       | MMRC0412 | Treated            |
| C20orf26  | 10  | 36256547(-)       |           | 20  | 19989182(+)       | Translocation         |             | MMRC0191 | Treated            |
| C22orf43  | 22  | 22294283          |           |     |                   | In frame deletion     | D126_A127>A | MMRC0412 | Treated            |
| C2CD3     | 11  | 73426367          |           |     |                   | Missense              | Q1895H      | MMRC0286 | Untreated          |
| C2orf61   | 2   | 23491513(-)       |           | 2   | 47208515(-)       | Long range            |             | MMRC0191 | Treated            |
| C2orf71   | 2   | 29148851          |           |     |                   | Missense              | S594F       | MMRC0028 | Untreated          |
| C2orf71   | 2   | 29148816          |           |     |                   | Missense              | D606N       | MMRC0322 | Untreated          |
| C2orf86   | 2   | 63430182(+)       |           | 23  | 118279592(+)      | Translocation         |             | MMRC0335 | Treated            |
| C2orf86   | 2   | 63430398(-)       |           | 23  | 118279776(-)      | Translocation         |             | MMRC0335 | Treated            |
| C3orf38   | 3   | 88288258          |           |     |                   | Missense              | R258L       | MMRC0389 | Treated            |
| C3orf64   | 3   | 69136988          |           |     |                   | Missense              | H170N       | MMRC0406 | Untreated          |
| C4orf43   | 4   | 164647655         |           |     |                   | Missense              | K8N         | MMRC0335 | Treated            |
| C5        | 9   | 122784867         |           |     |                   | Missense              | V1093I      | MMRC0376 | Untreated          |
| C5orf34   | 5   | 43541813          |           |     |                   | Nonsense              | W242*       | MMRC0392 | Treated            |
| C6orf125  | 6   | 33786327(+)       | IP6K3     | 6   | 33801238(+)       | Inversion             |             | MMRC0191 | Treated            |
| C6orf138  | 6   | 48143998          |           |     |                   | Missense              | S118F       | MMRC0309 | Untreated          |
| C6orf146  | 6   | 4014219           |           |     |                   | Missense              | E413K       | MMRC0389 | Treated            |
| C6orf15   | 6   | 31187264          |           |     |                   | In frame deletion     | G262_G284>G | MMRC0028 | Untreated          |
| C6orf170  | 6   | 121468888         |           |     |                   | Missense              | S1149P      | MMRC0376 | Untreated          |
| C7orf50   | 7   | 809715(+)         |           | 7   | 1015815(-)        | Deletion              |             | MMRC0392 | Treated            |
| C9orf30   | 9   | 102252848         |           |     |                   | Nonsense              | Q203*       | MMRC0389 | Treated            |
| C9orf78   | 1   | 19228814(-)       |           | 9   | 131632155(+)      | Translocation         |             | MMRC0191 | Treated            |
| C9orf85   | 9   | 73777444          |           |     |                   | Frame shift insertion | E114fs      | MMRC0356 | Untreated          |
| C9orf93   | 9   | 15581381          |           |     |                   | Nonsense              | Q124*       | MMRC0319 | Untreated          |
| CA3       | 8   | 86541652          |           |     |                   | Missense              | G111R       | MMRC0412 | Treated            |
| CACNA1A   | 12  | 10717042(-)       |           | 19  | 13356240(+)       | Translocation         |             | MMRC0344 | Treated            |
| CACNA1B   | 9   | 139893325         |           |     |                   | Splice site           | P95_splice  | MMRC0376 | Untreated          |
| CACNA1C   | 3   | 67360306(-)       |           | 12  | 2353255(-)        | Translocation         |             | MMRC0191 | Treated            |
| CADPS     | 3   | 62398862          |           |     |                   | Missense              | R1245H      | MMRC0332 | Treated            |

Supplementary Table 3 (continued)



| Gene      | Chr | Position (strand) | 2nd gene | Chr | Position (strand) | Type               | AA change   | Sample   | Previously treated |
|-----------|-----|-------------------|----------|-----|-------------------|--------------------|-------------|----------|--------------------|
| CALCR     | 7   | 92928104          |          |     |                   | Missense           | V239I       | MMRC0390 | Treated            |
| CALR3     | 19  | 16454284          |          |     |                   | Missense           | A299P       | MMRC0308 | Treated            |
| CAMK1D    | 10  | 12843023          |          |     |                   | Missense           | L124V       | MMRC0389 | Treated            |
| CAMK1D    | 10  | 12437494(-)       |          | X   | 145395207(-)      | Translocation      |             | MMRC0343 | Treated            |
| CAMK4     | 5   | 110842426(+)      |          | 5   | 111028801(-)      | Deletion           |             | MMRC0332 | Treated            |
| CAMK4     | 5   | 110826946(+)      |          | 10  | 78141709(-)       | Translocation      |             | MMRC0309 | Untreated          |
| CAMLG     | 5   | 134106601(-)      | DDX46    | 5   | 134141589(+)      | Tandem duplication |             | MMRC0425 | Untreated          |
| CAMTA1    | 1   | 7727615           |          |     |                   | Missense           | W1439S      | MMRC0242 | Treated            |
| CAMTA1    | 1   | 7721013           |          |     |                   | Missense           | R1356W      | MMRC0338 | Untreated          |
| CANT1     | 17  | 74504779          |          |     |                   | Missense           | N174I       | MMRC0335 | Treated            |
| CAPG      | 2   | 85482538          |          |     |                   | Missense           | V26G        | MMRC0347 | Untreated          |
| CAPN12    | 19  | 43924381          |          |     |                   | Missense           | F146L       | MMRC0191 | Treated            |
| CAPZA1    | 1   | 112998752         |          |     |                   | Missense           | R121T       | MMRC0286 | Untreated          |
| CARD11    | 7   | 2930442           |          |     |                   | Missense           | Y631H       | MMRC0375 | Treated            |
| CARD11    | 7   | 2925677           |          |     |                   | Missense           | D789N       | MMRC0425 | Untreated          |
| CASC1     | 12  | 25228630(+)       |          | 12  | 27084669(+)       | Long range         |             | MMRC0421 | Treated            |
| CASC1     | 12  | 25229286(-)       |          | 12  | 27064168(+)       | Long range         |             | MMRC0421 | Treated            |
| CASC1     | 12  | 25237517(+)       |          | 12  | 27084863(-)       | Long range         |             | MMRC0421 | Treated            |
| CASK      | X   | 41299822          |          |     |                   | Missense           | S606L       | MMRC0173 | Treated            |
| CASP8AP2  | 6   | 90615866(+)       | PTPRN2   | 7   | 157695832(-)      | Translocation      |             | MMRC0191 | Treated            |
| CBLB      | 3   | 106953138         |          |     |                   | Nonsense           | W194*       | MMRC0425 | Untreated          |
| CBLN1     | 16  | 47870979          |          |     |                   | Missense           | S140L       | MMRC0244 | Untreated          |
| CCDC111   | 1   | 224073101(+)      |          | 4   | 185850137(+)      | Translocation      |             | MMRC0344 | Treated            |
| CCDC123   | 19  | 38100631(+)       | RHPN2    | 19  | 38213530(-)       | Deletion           |             | MMRC0389 | Treated            |
| CCDC123   | 19  | 38136359          |          |     |                   | Splice site        | Q164_splice | MMRC0427 | Treated            |
| CCDC144NL | 17  | 20710609          |          |     |                   | Splice site        | A139_splice | MMRC0242 | Treated            |
| CCDC147   | 10  | 106114629         |          |     |                   | Missense           | I197V       | MMRC0244 | Untreated          |
| CCDC153   | 11  | 118569089         |          |     |                   | Missense           | G111S       | MMRC0343 | Treated            |
| CCDC157   | 22  | 29096840          |          |     |                   | Missense           | Q316E       | MMRC0347 | Untreated          |
| CCDC158   | 4   | 77507878          |          |     |                   | Missense           | E475K       | MMRC0286 | Untreated          |
| CCDC46    | 17  | 61388149          |          |     |                   | Missense           | T589D       | MMRC0286 | Untreated          |
| CCDC72    | 2   | 234756563(-)      |          | 3   | 48457441(-)       | Translocation      |             | MMRC0191 | Treated            |
| CCL2      | 17  | 29607891          |          |     |                   | Missense           | P78T        | MMRC0421 | Treated            |
| CCND1     | 11  | 69165273          |          |     |                   | Missense           | Q4R         | MMRC0322 | Untreated          |
| CCND1     | 11  | 69165400          |          |     |                   | Missense           | K46N        | MMRC0335 | Treated            |
| CD109     | 6   | 74576508          |          |     |                   | Missense           | A1146T      | MMRC0191 | Treated            |
| CD14      | 5   | 139991746         |          |     |                   | Missense           | T336S       | MMRC0421 | Treated            |
| CD163     | 12  | 7545124           |          |     |                   | Missense           | R112H       | MMRC0387 | Untreated          |
| CD1B      | 1   | 156566379         |          |     |                   | Missense           | L165R       | MMRC0282 | Treated            |
| CD200     | 3   | 113542439         |          |     |                   | Missense           | V5M         | MMRC0173 | Treated            |
| CD244     | 1   | 158691054(-)      |          | 1   | 159071543(+)      | Tandem duplication |             | MMRC0356 | Untreated          |
| CD247     | 1   | 165693972(-)      | SLC30A6  | 2   | 32270590(+)       | Translocation      |             | MMRC0356 | Untreated          |
| CD300LG   | 17  | 39281478          |          |     |                   | Nonsense           | E24*        | MMRC0335 | Treated            |
| CD3G      | 11  | 117728342         |          |     |                   | Missense           | R166Q       | MMRC0383 | Treated            |
| CDC2      | 10  | 62217876          |          |     |                   | Missense           | V124G       | MMRC0173 | Treated            |
| CDC20B    | 5   | 54488620(-)       |          | 10  | 38545191(-)       | Translocation      |             | MMRC0191 | Treated            |
| CDC25C    | 5   | 137689142(-)      | KDM3B    | 5   | 137772951(-)      | Inversion          |             | MMRC0344 | Treated            |
| CDC25C    | 5   | 137654248         |          |     |                   | Missense           | H208Q       | MMRC0332 | Treated            |
| CDC25C    | 3   | 135595261(+)      |          | 5   | 137658217(-)      | Translocation      |             | MMRC0191 | Treated            |
| CDC42BPB  | 14  | 102522651         |          |     |                   | Missense           | V206L       | MMRC0390 | Treated            |
| CDH11     | 16  | 63596246          |          |     |                   | Missense           | A10T        | MMRC0282 | Treated            |
| CDH19     | 18  | 62369362          |          |     |                   | Missense           | V242I       | MMRC0427 | Treated            |
| CDH2      | 18  | 23836997          |          |     |                   | Missense           | G328S       | MMRC0383 | Treated            |
| CDH2      | 18  | 23847649          |          |     |                   | Missense           | V132A       | MMRC0392 | Treated            |
| CDH20     | 18  | 57317640          |          |     |                   | Missense           | P163R       | MMRC0427 | Treated            |
| CDH8      | 16  | 60412508          |          |     |                   | Missense           | H282Q       | MMRC0387 | Untreated          |
| CDK4      | 12  | 56431115          |          |     |                   | Missense           | G127D       | MMRC0383 | Treated            |
| CDK4      | 12  | 56431697          |          |     |                   | Missense           | R24L        | MMRC0383 | Treated            |
| CDK5RAP1  | 12  | 10328091(-)       |          | 20  | 31432819(-)       | Translocation      |             | MMRC0344 | Treated            |
| CDON      | 11  | 125396467         |          |     |                   | Missense           | Q79E        | MMRC0389 | Treated            |
| CDYL      | 6   | 4880867           |          |     |                   | Missense           | D271N       | MMRC0319 | Untreated          |
| CECR2     | 22  | 16351270(-)       |          | 22  | 16925642(+)       | Tandem duplication |             | MMRC0425 | Untreated          |
| CELA1     | 12  | 50026682          |          |     |                   | Missense           | V3G         | MMRC0329 | Treated            |
| CELSR2    | 1   | 109597054         |          |     |                   | Missense           | T944P       | MMRC0381 | Untreated          |
| CENPF     | 1   | 212882949         |          |     |                   | Missense           | V1549F      | MMRC0322 | Untreated          |
| CENPJ     | 13  | 24378627          |          |     |                   | Missense           | W517G       | MMRC0408 | Untreated          |
| CEP110    | 9   | 122964045         |          |     |                   | Missense           | E1727V      | MMRC0191 | Treated            |
| CEP170    | 1   | 241395510         |          |     |                   | Nonsense           | S694*       | MMRC0332 | Treated            |
| CEP290    | 12  | 87048252          |          |     |                   | Missense           | R198K       | MMRC0338 | Untreated          |

Supplementary Table 3 (continued)



| Gene    | Chr | Position (strand) | 2nd gene | Chr | Position (strand) | Type               | AA change   | Sample   | Previously treated |
|---------|-----|-------------------|----------|-----|-------------------|--------------------|-------------|----------|--------------------|
| CETN2   | X   | 151748801         |          |     |                   | Splice site        | K54_splice  | MMRC0344 | Treated            |
| CFTR    | 7   | 117069732         |          |     |                   | Missense           | G1241V      | MMRC0191 | Treated            |
| CGN     | 1   | 149774199         |          |     |                   | Missense           | L988V       | MMRC0329 | Treated            |
| CGN     | 1   | 149757906         |          |     |                   | Missense           | S96L        | MMRC0389 | Treated            |
| CHD3    | 17  | 7751997           |          |     |                   | Missense           | G1755V      | MMRC0329 | Treated            |
| CHD3    | 17  | 7755593           |          |     |                   | Missense           | P2049S      | MMRC0338 | Untreated          |
| CHD3    | 17  | 7749732           |          |     |                   | Missense           | V1462I      | MMRC0412 | Treated            |
| CHD9    | 11  | 74132346(+)       |          | 16  | 51839852(-)       | Translocation      |             | MMRC0343 | Treated            |
| CHIA    | 1   | 111664495         |          |     |                   | Missense           | P331T       | MMRC0335 | Treated            |
| CHIA    | 1   | 111656482         |          |     |                   | Missense           | T68I        | MMRC0392 | Treated            |
| CHL1    | 3   | 379902            |          |     |                   | Missense           | Q474L       | MMRC0376 | Untreated          |
| CHRM2   | 7   | 136351244         |          |     |                   | Missense           | K364N       | MMRC0412 | Treated            |
| CHRM3   | 1   | 238137889         |          |     |                   | Missense           | R172K       | MMRC0387 | Untreated          |
| CHRNA5  | 3   | 112366549(+)      |          | 15  | 76663044(+)       | Translocation      |             | MMRC0344 | Treated            |
| CHRNA6  | 8   | 42731315          |          |     |                   | Missense           | R96H        | MMRC0408 | Untreated          |
| CHRN2   | 1   | 152808899         |          |     |                   | Missense           | R73Q        | MMRC0387 | Untreated          |
| CHRN3   | 8   | 42605616(+)       |          | 8   | 42672519(-)       | Deletion           |             | MMRC0392 | Treated            |
| CHRND   | 2   | 233106997         |          |     |                   | Missense           | A387V       | MMRC0421 | Treated            |
| CHST5   | 16  | 74120718          |          |     |                   | Missense           | R356C       | MMRC0347 | Untreated          |
| CIR1    | 2   | 174923653         |          |     |                   | Missense           | Q220K       | MMRC0381 | Untreated          |
| CIR1    | 2   | 174921781         |          |     |                   | Missense           | S348N       | MMRC0383 | Treated            |
| CKAP5   | 11  | 46779415          |          |     |                   | Missense           | T332A       | MMRC0421 | Treated            |
| CKM     | 19  | 50507001          |          |     |                   | Missense           | G167C       | MMRC0319 | Untreated          |
| CKM     | 19  | 50507001          |          |     |                   | Missense           | G167C       | MMRC0173 | Treated            |
| CLCN1   | 7   | 142759173         |          |     |                   | Missense           | I987T       | MMRC0308 | Treated            |
| CLIC4   | 1   | 25039121          |          |     |                   | Splice site        | K199_splice | MMRC0282 | Treated            |
| CLIP1   | 12  | 121397950         |          |     |                   | Missense           | I466M       | MMRC0329 | Treated            |
| CLIP4   | 2   | 29220129          |          |     |                   | Missense           | M233I       | MMRC0343 | Treated            |
| CLMN    | 14  | 94739168(-)       |          | 14  | 94949481(+)       | Tandem duplication |             | MMRC0425 | Untreated          |
| CLRN3   | 10  | 129572036         |          |     |                   | Missense           | S108Y       | MMRC0332 | Treated            |
| CLTC    | 17  | 55115537          |          |     |                   | Missense           | R1350T      | MMRC0375 | Treated            |
| CLVS2   | 1   | 94566893(+)       |          | 6   | 123377440(+)      | Translocation      |             | MMRC0332 | Treated            |
| CMBL    | 5   | 10339506          |          |     |                   | Missense           | M142I       | MMRC0387 | Untreated          |
| CMKLR1  | 12  | 107209782         |          |     |                   | Missense           | T363I       | MMRC0343 | Treated            |
| CMTM2   | 16  | 65171151          |          |     |                   | Missense           | E47V        | MMRC0282 | Treated            |
| CMTM7   | 3   | 32411457(+)       | DCTD     | 4   | 184063778(-)      | Translocation      |             | MMRC0309 | Untreated          |
| CMYA5   | 5   | 79066681          |          |     |                   | Missense           | I2113V      | MMRC0375 | Treated            |
| CMYA5   | 5   | 79065734          |          |     |                   | Missense           | P1797Q      | MMRC0389 | Treated            |
| CNBD1   | 8   | 83533762(-)       |          | 8   | 88093821(-)       | Long range         |             | MMRC0421 | Treated            |
| CNBD1   | 8   | 83666013(+)       |          | 8   | 88105353(+)       | Long range         |             | MMRC0421 | Treated            |
| CNGB3   | 8   | 87710281          |          |     |                   | Missense           | D488N       | MMRC0335 | Treated            |
| CNOT6   | 5   | 179928794         |          |     |                   | Missense           | S369Y       | MMRC0338 | Untreated          |
| CNOT6L  | 4   | 78860752          |          |     |                   | Missense           | P509T       | MMRC0421 | Treated            |
| CNTN3   | 3   | 74497474          |          |     |                   | Missense           | C339F       | MMRC0332 | Treated            |
| CNTN4   | 3   | 3053994           |          |     |                   | Missense           | R364W       | MMRC0173 | Treated            |
| CNTN5   | 11  | 99441414(+)       |          | 11  | 99458113(-)       | Deletion           |             | MMRC0319 | Untreated          |
| CNTNAP2 | 7   | 146814054         |          |     |                   | Missense           | T589P       | MMRC0004 | Untreated          |
| CNTNAP5 | 2   | 124857362(-)      |          | 14  | 46063526(-)       | Translocation      |             | MMRC0191 | Treated            |
| COG5    | 7   | 106658328         |          |     |                   | Missense           | L743F       | MMRC0389 | Treated            |
| COL12A1 | 6   | 75856549          |          |     |                   | Nonsense           | R2980*      | MMRC0423 | Treated            |
| COL16A1 | 1   | 31918125(-)       |          | 1   | 31950230(+)       | Tandem duplication |             | MMRC0421 | Treated            |
| COL17A1 | 10  | 105812026         |          |     |                   | Missense           | G297D       | MMRC0425 | Untreated          |
| COL19A1 | 6   | 70694528          |          |     |                   | Missense           | I91M        | MMRC0375 | Treated            |
| COL19A1 | 6   | 70685545(+)       |          | 8   | 31349810(-)       | Translocation      |             | MMRC0309 | Untreated          |
| COL1A1  | 17  | 45617947          |          |     |                   | Missense           | L1437P      | MMRC0216 | Untreated          |
| COL21A1 | 6   | 56143751          |          |     |                   | Missense           | V259I       | MMRC0392 | Treated            |
| COL23A1 | 5   | 177621343         |          |     |                   | Missense           | P230A       | MMRC0375 | Treated            |
| COL23A1 | 5   | 177760406(-)      | HABP4    | 9   | 98284071(+)       | Translocation      |             | MMRC0309 | Untreated          |
| COL3A1  | 2   | 189580857         |          |     |                   | Missense           | G1122D      | MMRC0338 | Untreated          |
| COL4A3  | 2   | 227818975         |          |     |                   | Missense           | K129T       | MMRC0389 | Treated            |
| COL4A6  | X   | 107305075         |          |     |                   | Missense           | G953R       | MMRC0335 | Treated            |
| COL5A2  | 2   | 189673088         |          |     |                   | Nonsense           | L120*       | MMRC0191 | Treated            |
| COL6A6  | 3   | 131768444         |          |     |                   | Missense           | Q497H       | MMRC0412 | Treated            |
| COL7A1  | 3   | 48597513          |          |     |                   | Missense           | R1312H      | MMRC0356 | Untreated          |
| COL7A1  | 3   | 48603939          |          |     |                   | Missense           | G533V       | MMRC0427 | Treated            |
| COPG    | 3   | 130462242         |          |     |                   | Missense           | A344T       | MMRC0412 | Treated            |
| COPS3   | 2   | 84020364(-)       |          | 17  | 17110098(-)       | Translocation      |             | MMRC0332 | Treated            |
| CORIN   | 4   | 47361926          |          |     |                   | Missense           | E490G       | MMRC0427 | Treated            |
| COX11   | 17  | 50400745          |          |     |                   | Missense           | R88W        | MMRC0356 | Untreated          |

Supplementary Table 3 (continued)

| Gene         | Chr | Position (strand) | 2nd gene | Chr | Position (strand) | Type               | AA change   | Sample   | Previously treated |
|--------------|-----|-------------------|----------|-----|-------------------|--------------------|-------------|----------|--------------------|
| CPEB4        | 5   | 173309189         |          |     |                   | Missense           | S510F       | MMRC0338 | Untreated          |
| CPSF3        | 2   | 9517178           |          |     |                   | Missense           | S589L       | MMRC0390 | Treated            |
| CPXM2        | 10  | 125584026(-)      |          | 10  | 126067313(+)      | Tandem duplication |             | MMRC0425 | Untreated          |
| CRB1         | 1   | 195657415         |          |     |                   | Missense           | F612L       | MMRC0335 | Treated            |
| CREBBP       | 16  | 3730528(-)        |          | 16  | 20164701(+)       | Long range         |             | MMRC0421 | Treated            |
| CRHBP        | 5   | 76287446          |          |     |                   | Splice site        | P182_splice | MMRC0387 | Untreated          |
| CRIPAK       | 4   | 1379363           |          |     |                   | Missense           | T355I       | MMRC0284 | Untreated          |
| CRYBG3       | 3   | 99048698(+)       |          | 3   | 99088815(-)       | Deletion           |             | MMRC0392 | Treated            |
| CSDE1        | 1   | 61119464(-)       |          | 1   | 115075967(+)      | Long range         |             | MMRC0408 | Untreated          |
| CSMD2        | 1   | 33962836          |          |     |                   | Missense           | R878C       | MMRC0335 | Treated            |
| CSMD2        | 1   | 33931142          |          |     |                   | Missense           | E1303K      | MMRC0347 | Untreated          |
| CSMD3        | 8   | 114100564         |          |     |                   | Missense           | P273L       | MMRC0308 | Treated            |
| CSNK1G3      | 5   | 122954080         |          |     |                   | Missense           | L307I       | MMRC0390 | Treated            |
| CSPG4        | 15  | 73769113          |          |     |                   | Missense           | R450W       | MMRC0309 | Untreated          |
| CSRNP3       | 2   | 166244255         |          |     |                   | Missense           | V502I       | MMRC0392 | Treated            |
| CTCF         | 20  | 55517213          |          |     |                   | Missense           | G510V       | MMRC0309 | Untreated          |
| CTNNA3       | 10  | 67991751(+)       | HPSE2    | 10  | 100583403(-)      | Long range         |             | MMRC0332 | Treated            |
| CTNNA3       | 10  | 68878041(-)       |          | 10  | 69072547(+)       | Tandem duplication |             | MMRC0319 | Untreated          |
| CTNNAL1      | 9   | 110794886         |          |     |                   | Missense           | N122K       | MMRC0322 | Untreated          |
| CTNND1       | 11  | 54736581(+)       |          | 11  | 57328220(-)       | Long range         |             | MMRC0421 | Treated            |
| CTNND2       | 5   | 11399603          |          |     |                   | Nonsense           | Y503*       | MMRC0347 | Untreated          |
| CTTN         | 11  | 69940833          |          |     |                   | Missense           | G175A       | MMRC0309 | Untreated          |
| CUBN         | 10  | 17125964          |          |     |                   | Missense           | S1233P      | MMRC0322 | Untreated          |
| CUEDC2       | 10  | 104173261         |          |     |                   | Missense           | R259Q       | MMRC0375 | Treated            |
| CUL5         | 11  | 107418816(+)      |          | 11  | 128642410(+)      | Long range         |             | MMRC0375 | Treated            |
| CUL7         | 6   | 43124247          |          |     |                   | Nonsense           | Q706*       | MMRC0322 | Untreated          |
| CUX2         | 12  | 110213632         |          |     |                   | Missense           | R110H       | MMRC0004 | Untreated          |
| CUX2         | 12  | 110256876         |          |     |                   | Missense           | V1059I      | MMRC0216 | Untreated          |
| CXorf22      | X   | 35854181          |          |     |                   | Missense           | K126Q       | MMRC0284 | Untreated          |
| CXorf57      | 23  | 105784286(-)      |          | 23  | 125251872(-)      | Long range         |             | MMRC0392 | Treated            |
| CYC1         | 8   | 145223274         |          |     |                   | Missense           | R167Q       | MMRC0308 | Treated            |
| CYLD         | 16  | 49378431(+)       |          | 16  | 49379310(-)       | Deletion           |             | MMRC0335 | Treated            |
| CYP11B2      | 8   | 143996171         |          |     |                   | Missense           | R30W        | MMRC0286 | Untreated          |
| CYP2F1       | 19  | 46319298          |          |     |                   | Missense           | R194C       | MMRC0383 | Treated            |
| CYP8B1       | 3   | 42891855          |          |     |                   | Missense           | T153M       | MMRC0381 | Untreated          |
| DAPK1        | 9   | 89507784          |          |     |                   | Missense           | H964Q       | MMRC0282 | Treated            |
| DAPK1        | 9   | 89511987          |          |     |                   | Missense           | K1394R      | MMRC0308 | Treated            |
| DAPK1        | 9   | 89486233          |          |     |                   | Missense           | G699E       | MMRC0335 | Treated            |
| DAPK1        | 9   | 89409460(+)       | FAM70B   | 13  | 113629070(-)      | Translocation      |             | MMRC0425 | Untreated          |
| DAPK1        | 9   | 89409470(-)       | FAM70B   | 13  | 113629456(+)      | Translocation      |             | MMRC0425 | Untreated          |
| DCAF12L1     | X   | 125512984         |          |     |                   | Missense           | A430E       | MMRC0383 | Treated            |
| DCC          | 6   | 127201041(-)      |          | 18  | 48821684(+)       | Translocation      |             | MMRC0338 | Untreated          |
| DCC          | 18  | 48866177(+)       |          | X   | 101299697(-)      | Translocation      |             | MMRC0387 | Untreated          |
| DCHS1        | 11  | 6601555           |          |     |                   | Nonsense           | S2643*      | MMRC0389 | Treated            |
| DCHS2        | 4   | 155438464         |          |     |                   | Missense           | N1696S      | MMRC0389 | Treated            |
| DCHS2        | 4   | 155377120         |          |     |                   | Missense           | H2257N      | MMRC0392 | Treated            |
| DCHS2        | 4   | 155377152         |          |     |                   | Missense           | I2246T      | MMRC0173 | Treated            |
| DCLK2        | 4   | 151373029         |          |     |                   | Missense           | E463K       | MMRC0322 | Untreated          |
| DCT          | 13  | 93912536(+)       |          | 13  | 94254023(-)       | Deletion           |             | MMRC0356 | Untreated          |
| DDX11        | 12  | 31129245          |          |     |                   | Missense           | R186W       | MMRC0329 | Treated            |
| DDX11        | 12  | 31133348          |          |     |                   | Missense           | R263Q       | MMRC0375 | Treated            |
| DDX23        | 12  | 47520116          |          |     |                   | Missense           | D121N       | MMRC0329 | Treated            |
| DDX25        | 11  | 125292218         |          |     |                   | Missense           | I300M       | MMRC0389 | Treated            |
| DENND1B      | 1   | 196003820(-)      | DENND1A  | 9   | 125217126(+)      | Translocation      |             | MMRC0332 | Treated            |
| DENND4C      | 9   | 19336503          |          |     |                   | Missense           | V961I       | MMRC0421 | Treated            |
| DENND4C      | 1   | 201999182(-)      |          | 9   | 19318941(+)       | Translocation      |             | MMRC0383 | Treated            |
| DHDDS        | 1   | 26652949(+)       | FHOD3    | 18  | 32169734(-)       | Translocation      |             | MMRC0191 | Treated            |
| DHRS11       | 17  | 32022689          |          |     |                   | Missense           | G46D        | MMRC0282 | Treated            |
| DHX15        | 4   | 24159734          |          |     |                   | Missense           | E364K       | MMRC0389 | Treated            |
| DIAPH2       | X   | 96197114(+)       |          | X   | 96276850(-)       | Deletion           |             | MMRC0356 | Untreated          |
| DIAPH2       | X   | 96053996          |          |     |                   | Missense           | F201V       | MMRC0406 | Untreated          |
| DIS3         | 13  | 72244372          |          |     |                   | Missense           | S447R       | MMRC0308 | Treated            |
| DIS3         | 13  | 72234065          |          |     |                   | Missense           | R750K       | MMRC0319 | Untreated          |
| DIS3         | 13  | 72244028          |          |     |                   | Missense           | V474G       | MMRC0343 | Treated            |
| DIS3         | 13  | 72234108          |          |     |                   | Missense           | G736R       | MMRC0421 | Treated            |
| DISP2        | 15  | 38443358          |          |     |                   | Missense           | H120Q       | MMRC0389 | Treated            |
| DKFZp761E198 | 11  | 65303756          |          |     |                   | Missense           | E205K       | MMRC0389 | Treated            |
| DKK2         | 4   | 108175987         |          |     |                   | Missense           | N71D        | MMRC0332 | Treated            |
| DLG2         | 11  | 82850778          |          |     |                   | Missense           | M807I       | MMRC0286 | Untreated          |

Supplementary Table 3 (continued)

| Gene    | Chr | Position (strand) | 2nd gene | Chr | Position (strand) | Type          | AA change    | Sample   | Previously treated |
|---------|-----|-------------------|----------|-----|-------------------|---------------|--------------|----------|--------------------|
| DMXL1   | 5   | 118513835         |          |     |                   | Missense      | D1472N       | MMRC0191 | Treated            |
| DMXL2   | 15  | 49550868          |          |     |                   | Missense      | D2411E       | MMRC0173 | Treated            |
| DMXL2   | 3   | 39389102(+)       |          | 15  | 49670533(+)       | Translocation |              | MMRC0343 | Treated            |
| DNAH11  | 7   | 21688701(+)       |          | 19  | 37979626(+)       | Translocation |              | MMRC0376 | Untreated          |
| DNAH5   | 5   | 13967660          |          |     |                   | Missense      | E430G        | MMRC0322 | Untreated          |
| DNAH5   | 5   | 13897959          |          |     |                   | Missense      | K1753T       | MMRC0335 | Treated            |
| DNAH9   | 17  | 11548440          |          |     |                   | Missense      | D1783N       | MMRC0322 | Untreated          |
| DNAH9   | 17  | 11543776          |          |     |                   | Nonsense      | Q1626*       | MMRC0389 | Treated            |
| DNAH9   | 17  | 11538956(-)       | FAM3B    | 21  | 41624442(+)       | Translocation |              | MMRC0392 | Treated            |
| DNAJA1  | 9   | 33020498          |          |     |                   | Missense      | Q159P        | MMRC0319 | Untreated          |
| DNAJC14 | 12  | 54508123          |          |     |                   | Missense      | R196K        | MMRC0028 | Untreated          |
| DNM2    | 19  | 10795538          |          |     |                   | Missense      | S615L        | MMRC0387 | Untreated          |
| DNMT3B  | 20  | 30848280          |          |     |                   | Missense      | K421E        | MMRC0191 | Treated            |
| DNMT3B  | 20  | 30832882          |          |     |                   | Splice site   | Q68_splice   | MMRC0173 | Treated            |
| DOCK10  | 2   | 225389675         |          |     |                   | Splice site   | T1090_splice | MMRC0335 | Treated            |
| DOCK3   | 3   | 50941199(-)       |          | 19  | 54424331(+)       | Translocation |              | MMRC0383 | Treated            |
| DOCK4   | 7   | 111330149(-)      |          | 7   | 115106315(+)      | Long range    |              | MMRC0191 | Treated            |
| DOCK8   | 9   | 366301            |          |     |                   | Missense      | T734S        | MMRC0356 | Untreated          |
| DOLK    | 9   | 130748152         |          |     |                   | Missense      | P418A        | MMRC0329 | Treated            |
| DONSON  | 21  | 33878793          |          |     |                   | Missense      | T253N        | MMRC0375 | Treated            |
| DOPEY2  | 21  | 36587690          |          |     |                   | Missense      | Q2283P       | MMRC0309 | Untreated          |
| DOT1L   | 19  | 2167622           |          |     |                   | Missense      | G756S        | MMRC0381 | Untreated          |
| DPP6    | 7   | 153794042(+)      |          | X   | 95567529(+)       | Translocation |              | MMRC0173 | Treated            |
| DPY19L2 | 12  | 62343861          |          |     |                   | Missense      | R132C        | MMRC0191 | Treated            |
| DRD2    | 4   | 52583111(-)       |          | 11  | 112796764(+)      | Translocation |              | MMRC0392 | Treated            |
| DRD3    | 3   | 115341045         |          |     |                   | Missense      | P239T        | MMRC0338 | Untreated          |
| DSCAM   | 21  | 40472889          |          |     |                   | Missense      | S928P        | MMRC0308 | Treated            |
| DSCAM   | 17  | 11861613(+)       |          | 21  | 40946326(+)       | Translocation |              | MMRC0392 | Treated            |
| DSCAM   | 17  | 14820911(-)       |          | 21  | 40934450(-)       | Translocation |              | MMRC0392 | Treated            |
| DSG1    | 18  | 27180053          |          |     |                   | Missense      | M665K        | MMRC0383 | Treated            |
| DSPP    | 4   | 88756533          |          |     |                   | Missense      | N1232S       | MMRC0332 | Treated            |
| DST     | 6   | 56491665(+)       |          | 6   | 56692575(-)       | Deletion      |              | MMRC0375 | Treated            |
| DST     | 6   | 56577270          |          |     |                   | Missense      | E2835G       | MMRC0390 | Treated            |
| DST     | 6   | 56505221          |          |     |                   | Missense      | I3544S       | MMRC0412 | Treated            |
| DSTYK   | 1   | 96264245(-)       |          | 1   | 203401185(-)      | Long range    |              | MMRC0191 | Treated            |
| DYSF    | 2   | 71642546          |          |     |                   | Missense      | E804D        | MMRC0335 | Treated            |
| EED     | 11  | 85660516(+)       |          | 11  | 85675554(-)       | Deletion      |              | MMRC0421 | Treated            |
| EFCAB3  | 17  | 57847388          |          |     |                   | Missense      | R428K        | MMRC0191 | Treated            |
| EFHC1   | 6   | 52425580          |          |     |                   | Missense      | T237P        | MMRC0216 | Untreated          |
| EFNA4   | 1   | 153308070         |          |     |                   | Missense      | R196H        | MMRC0376 | Untreated          |
| EGFR    | 7   | 55236444          |          |     |                   | Missense      | D1006Y       | MMRC0390 | Treated            |
| EGLN3   | 14  | 33465977          |          |     |                   | Missense      | V210L        | MMRC0244 | Untreated          |
| EGR1    | 5   | 137829376         |          |     |                   | Missense      | Q9H          | MMRC0282 | Treated            |
| EHBP1   | 2   | 63077366          |          |     |                   | Missense      | A1093T       | MMRC0381 | Untreated          |
| EHMT1   | 9   | 139827373         |          |     |                   | Missense      | A988T        | MMRC0423 | Treated            |
| EIF3B   | 7   | 2385341           |          |     |                   | Missense      | Y760F        | MMRC0343 | Treated            |
| ELAVL2  | 9   | 23694928          |          |     |                   | Missense      | D159N        | MMRC0383 | Treated            |
| ELF2    | 4   | 140200998         |          |     |                   | Missense      | S303P        | MMRC0244 | Untreated          |
| ELOVL3  | 10  | 103976305         |          |     |                   | Missense      | A4T          | MMRC0390 | Treated            |
| EMID1   | 22  | 27940941          |          |     |                   | Missense      | R43L         | MMRC0347 | Untreated          |
| ENOX1   | 13  | 42798568          |          |     |                   | Missense      | R377Q        | MMRC0389 | Treated            |
| EP400   | 12  | 131095428         |          |     |                   | Missense      | K2253R       | MMRC0191 | Treated            |
| EPB41L3 | 18  | 5396904           |          |     |                   | Missense      | T741S        | MMRC0284 | Untreated          |
| EPHA5   | 4   | 66098050(+)       | ARHGAP24 | 4   | 86845602(-)       | Long range    |              | MMRC0344 | Treated            |
| EPHA6   | 3   | 98850840(+)       |          | 3   | 99018634(-)       | Deletion      |              | MMRC0319 | Untreated          |
| EPHA6   | 3   | 98925845(-)       | SRRM4    | 12  | 117926083(+)      | Translocation |              | MMRC0389 | Treated            |
| EPHA7   | 6   | 94025844          |          |     |                   | Missense      | A625T        | MMRC0359 | Untreated          |
| EPHA7   | 6   | 94185719          |          |     |                   | Missense      | F21Y         | MMRC0389 | Treated            |
| EPHB1   | 3   | 136273401(+)      |          | 3   | 136342717(-)      | Deletion      |              | MMRC0356 | Untreated          |
| EPHB3   | 3   | 185777638         |          |     |                   | Missense      | A443T        | MMRC0191 | Treated            |
| EPHB3   | 3   | 185773037         |          |     |                   | Missense      | Q79K         | MMRC0282 | Treated            |
| EPHB4   | 7   | 100241140         |          |     |                   | Missense      | R866H        | MMRC0347 | Untreated          |
| EPYC    | 12  | 89920434          |          |     |                   | Missense      | F14I         | MMRC0335 | Treated            |
| ERBB2IP | 5   | 65385594          |          |     |                   | Missense      | T898A        | MMRC0319 | Untreated          |
| ERBB2IP | 5   | 65355987          |          |     |                   | Missense      | D257A        | MMRC0421 | Treated            |
| ERBB3   | 12  | 54760558(+)       |          | 12  | 54941789(-)       | Deletion      |              | MMRC0412 | Treated            |
| ERC1    | 12  | 1215386(+)        | WNT5B    | 12  | 1619954(-)        | Deletion      |              | MMRC0191 | Treated            |
| ERLIN1  | 10  | 101927910         |          |     |                   | Missense      | E92K         | MMRC0389 | Treated            |

Supplementary Table 3 (continued)

| Gene    | Chr | Position (strand) | 2nd gene | Chr | Position (strand) | Type                 | AA change | Sample   | Previously treated |
|---------|-----|-------------------|----------|-----|-------------------|----------------------|-----------|----------|--------------------|
| ESR1    | 6   | 152457336         |          |     |                   | Missense             | Q498P     | MMRC0329 | Treated            |
| ESYT1   | 12  | 54813701          |          |     |                   | Missense             | L452F     | MMRC0359 | Untreated          |
| ETNK1   | 12  | 22703262          |          |     |                   | Missense             | N244S     | MMRC0338 | Untreated          |
| EV15    | 1   | 92936075          |          |     |                   | Missense             | L276P     | MMRC0356 | Untreated          |
| EWSR1   | 22  | 27915334(+)       |          | 22  | 28014414(-)       | Deletion             |           | MMRC0343 | Treated            |
| EWSR1   | 22  | 28000740(+)       |          | 22  | 28048145(-)       | Deletion             |           | MMRC0343 | Treated            |
| EXOC6   | 10  | 94633807(+)       |          | 10  | 94748129(-)       | Deletion             |           | MMRC0387 | Untreated          |
| EXOSC2  | 9   | 132568055(-)      |          | 9   | 132569509(-)      | Inversion            |           | MMRC0338 | Untreated          |
| EYA4    | 6   | 133875588         |          |     |                   | Missense             | D417N     | MMRC0425 | Untreated          |
| EYS     | 6   | 66261477          |          |     |                   | Missense             | C183F     | MMRC0381 | Untreated          |
| F3      | 1   | 94774262          |          |     |                   | Missense             | T87S      | MMRC0191 | Treated            |
| F5      | 1   | 167772526         |          |     |                   | Missense             | D1605N    | MMRC0389 | Treated            |
| FA2H    | 16  | 73305596          |          |     |                   | Missense             | T371M     | MMRC0173 | Treated            |
| FAF1    | 1   | 50742413(+)       | C1orf185 | 1   | 51358905(-)       | Deletion             |           | MMRC0408 | Untreated          |
| FAF2    | 5   | 175842798(-)      |          | 23  | 93410042(-)       | Translocation        |           | MMRC0191 | Treated            |
| FAM115A | 7   | 143204463         |          |     |                   | Missense             | R58C      | MMRC0329 | Treated            |
| FAM116A | 3   | 57594099          |          |     |                   | Missense             | S429F     | MMRC0286 | Untreated          |
| FAM120A | 9   | 95358144(-)       | NALCN    | 13  | 100726293(+)      | Translocation        |           | MMRC0191 | Treated            |
| FAM120B | 6   | 170469940         |          |     |                   | Missense             | D513N     | MMRC0309 | Untreated          |
| FAM12A  | 14  | 20285657          |          |     |                   | Missense             | N26K      | MMRC0375 | Treated            |
| FAM134B | 5   | 16538412(-)       | AUTS2    | 7   | 68960111(+)       | Translocation        |           | MMRC0191 | Treated            |
| FAM135A | 6   | 71243741          |          |     |                   | Missense             | H176P     | MMRC0309 | Untreated          |
| FAM135B | 8   | 139233957         |          |     |                   | Missense             | L648P     | MMRC0173 | Treated            |
| FAM153B | 5   | 175461190         |          |     |                   | Missense             | L222F     | MMRC0406 | Untreated          |
| FAM155A | 13  | 107316728         |          |     |                   | Missense             | Q73R      | MMRC0381 | Untreated          |
| FAM155A | 2   | 58643357(+)       |          | 13  | 106644312(-)      | Translocation        |           | MMRC0387 | Untreated          |
| FAM174A | 5   | 99925862(+)       |          | 14  | 92957371(-)       | Translocation        |           | MMRC0425 | Untreated          |
| FAM174A | 5   | 99925884(-)       |          | 14  | 92957369(+)       | Translocation        |           | MMRC0425 | Untreated          |
| FAM18B2 | 17  | 15389837          |          |     |                   | Missense             | T150R     | MMRC0412 | Treated            |
| FAM190A | 4   | 91312895(+)       |          | 4   | 91455046(-)       | Deletion             |           | MMRC0319 | Untreated          |
| FAM190A | 4   | 91741790(+)       |          | 4   | 92050647(-)       | Deletion             |           | MMRC0421 | Treated            |
| FAM190A | 4   | 91838617(+)       |          | 4   | 91993399(-)       | Deletion             |           | MMRC0319 | Untreated          |
| FAM190B | 10  | 86175545          |          |     |                   | Missense             | P595L     | MMRC0390 | Treated            |
| FAM38B  | 18  | 10670234          |          |     |                   | Missense             | N2525K    | MMRC0335 | Treated            |
| FAM46C  | 1   | 117967150         |          |     |                   | Frame shift deletion | I46fs     | MMRC0412 | Treated            |
| FAM46C  | 1   | 117967569         |          |     |                   | In frame deletion    | I186del   | MMRC0406 | Untreated          |
| FAM46C  | 1   | 117967621         |          |     |                   | Missense             | S203C     | MMRC0216 | Untreated          |
| FAM46C  | 1   | 117967557         |          |     |                   | Missense             | D182Y     | MMRC0390 | Treated            |
| FAM46C  | 1   | 117967954         |          |     |                   | Missense             | V314G     | MMRC0408 | Untreated          |
| FAM47B  | 23  | 34871321(+)       |          | 23  | 34958336(-)       | Deletion             |           | MMRC0319 | Untreated          |
| FAM5B   | 1   | 175493103         |          |     |                   | Missense             | R210Q     | MMRC0332 | Treated            |
| FAM5C   | 1   | 188458384(+)      |          | 1   | 188673956(-)      | Deletion             |           | MMRC0421 | Treated            |
| FAM73B  | 9   | 130845216(+)      | PPP2R4   | 9   | 130929149(-)      | Deletion             |           | MMRC0191 | Treated            |
| FAM82A2 | 12  | 14767152(-)       |          | 15  | 38832870(-)       | Translocation        |           | MMRC0335 | Treated            |
| FAM83H  | 8   | 144880320         |          |     |                   | Missense             | G1100E    | MMRC0308 | Treated            |
| FANCB   | X   | 14793391          |          |     |                   | Missense             | K55Q      | MMRC0387 | Untreated          |
| FAT3    | 11  | 90023454(+)       |          | 11  | 92182626(-)       | Long range           |           | MMRC0338 | Untreated          |
| FAT3    | 11  | 91727410          |          |     |                   | Missense             | S828R     | MMRC0191 | Treated            |
| FAT3    | 11  | 91726190          |          |     |                   | Missense             | I422F     | MMRC0376 | Untreated          |
| FAT3    | 11  | 91726313          |          |     |                   | Missense             | E463K     | MMRC0389 | Treated            |
| FBN3    | 19  | 8102579           |          |     |                   | Missense             | R617C     | MMRC0381 | Untreated          |
| FBXL13  | 7   | 102359616         |          |     |                   | Missense             | S242N     | MMRC0329 | Treated            |
| FBXL19  | 16  | 30860980          |          |     |                   | Missense             | RR468>RW  | MMRC0335 | Treated            |
| FBXW12  | 3   | 48389575(+)       |          | 3   | 48390034(-)       | Deletion             |           | MMRC0406 | Untreated          |
| FBXW12  | 3   | 48391853          |          |     |                   | Missense             | E98Q      | MMRC0309 | Untreated          |
| FCGBP   | 19  | 45060581          |          |     |                   | Missense             | V4203M    | MMRC0381 | Untreated          |
| FCHSD2  | 11  | 72342786(-)       | ARHGEF17 | 11  | 72707119(+)       | Tandem duplication   |           | MMRC0356 | Untreated          |
| FCRL2   | 1   | 156005059         |          |     |                   | Missense             | E218K     | MMRC0389 | Treated            |
| FEN1    | 11  | 61320050          |          |     |                   | Missense             | Q214R     | MMRC0282 | Treated            |
| FFAR2   | 19  | 40632784          |          |     |                   | Missense             | G110R     | MMRC0308 | Treated            |
| FGA     | 4   | 155726959         |          |     |                   | Missense             | G358R     | MMRC0356 | Untreated          |
| FGA     | 4   | 155726404         |          |     |                   | Missense             | E543K     | MMRC0389 | Treated            |
| FGF6    | 12  | 4413697           |          |     |                   | Missense             | R191Q     | MMRC0173 | Treated            |
| FGFR2   | 10  | 123253372         |          |     |                   | Missense             | T366M     | MMRC0356 | Untreated          |
| FGG     | 4   | 155753196         |          |     |                   | Missense             | H6Y       | MMRC0376 | Untreated          |
| FGGY    | 1   | 59797002(+)       | FAM159B  | 5   | 64028255(+)       | Translocation        |           | MMRC0319 | Untreated          |
| FHDC1   | 4   | 154083946         |          |     |                   | Missense             | R96Q      | MMRC0423 | Treated            |
| FHDC1   | 4   | 154117155         |          |     |                   | Nonsense             | R1088*    | MMRC0383 | Treated            |
| FIG4    | 6   | 110219423         |          |     |                   | Missense             | P778S     | MMRC0286 | Untreated          |

Supplementary Table 3 (continued)

| Gene     | Chr | Position (strand) | 2nd gene | Chr | Position (strand) | Type               | AA change   | Sample   | Previously treated |
|----------|-----|-------------------|----------|-----|-------------------|--------------------|-------------|----------|--------------------|
| FKBP5    | 6   | 35651654          |          |     |                   | Missense           | V437G       | MMRC0406 | Untreated          |
| FLG      | 1   | 150543421         |          |     |                   | Missense           | G3522D      | MMRC0389 | Treated            |
| FLG2     | 1   | 150592174         |          |     |                   | Missense           | R1571K      | MMRC0028 | Untreated          |
| FLJ20184 | 4   | 106028973(+)      |          | 4   | 106757763(-)      | Deletion           |             | MMRC0332 | Treated            |
| FLJ43860 | 8   | 138372705(+)      |          | 8   | 142514381(-)      | Long range         |             | MMRC0421 | Treated            |
| FLNC     | 7   | 128271111         |          |     |                   | Missense           | Y946F       | MMRC0191 | Treated            |
| FLRT2    | 14  | 85157648          |          |     |                   | Missense           | A13S        | MMRC0309 | Untreated          |
| FMN1     | 15  | 31048687          |          |     |                   | Missense           | S613Y       | MMRC0389 | Treated            |
| FMN1     | 13  | 87772249(-)       |          | 15  | 31142435(-)       | Translocation      |             | MMRC0191 | Treated            |
| FMO1     | 1   | 169511175         |          |     |                   | Missense           | M130L       | MMRC0332 | Treated            |
| FNBP1    | 9   | 131710989         |          |     |                   | Splice site        | R432_splice | MMRC0421 | Treated            |
| FNDC3A   | 13  | 48485221(+)       |          | 13  | 48556445(-)       | Deletion           |             | MMRC0375 | Treated            |
| FNDC3A   | 13  | 48497043(+)       |          | 13  | 48638419(-)       | Deletion           |             | MMRC0375 | Treated            |
| FNTB     | 14  | 64580830          |          |     |                   | Missense           | R291C       | MMRC0338 | Untreated          |
| FOXK1    | 7   | 4763284           |          |     |                   | Missense           | R395Q       | MMRC0322 | Untreated          |
| FOXO3    | 6   | 109021861(-)      |          | 17  | 40800755(+)       | Translocation      |             | MMRC0356 | Untreated          |
| FOXP1    | 3   | 71109797          |          |     |                   | Missense           | P407L       | MMRC0004 | Untreated          |
| FOXP2    | 7   | 113998137         |          |     |                   | Missense           | S100T       | MMRC0423 | Treated            |
| FRK      | 6   | 116370951         |          |     |                   | Missense           | S411C       | MMRC0359 | Untreated          |
| FRMD3    | 9   | 85230753(-)       | LIMK2    | 22  | 29971364(-)       | Translocation      |             | MMRC0387 | Untreated          |
| FRMPD1   | 9   | 37727115          |          |     |                   | Missense           | S475F       | MMRC0322 | Untreated          |
| FRYL     | 4   | 48303252          |          |     |                   | Missense           | Y234S       | MMRC0427 | Treated            |
| FSCB     | 14  | 44043760          |          |     |                   | Missense           | E727D       | MMRC0322 | Untreated          |
| FXYP6    | 11  | 117218642         |          |     |                   | Splice site        | A20_splice  | MMRC0356 | Untreated          |
| G6PC2    | 2   | 169466275         |          |     |                   | Missense           | I63T        | MMRC0286 | Untreated          |
| GAA      | 17  | 75696270          |          |     |                   | Missense           | L312R       | MMRC0028 | Untreated          |
| GAB2     | 11  | 77761957(-)       | NARS2    | 11  | 77868861(+)       | Tandem duplication |             | MMRC0356 | Untreated          |
| GAB2     | 11  | 77609971(+)       | CSNK1E   | 22  | 37022655(-)       | Translocation      |             | MMRC0191 | Treated            |
| GABRA1   | 5   | 161232700         |          |     |                   | Splice site        | E86_splice  | MMRC0329 | Treated            |
| GABRB1   | 3   | 142881392(-)      |          | 4   | 46802698(-)       | Translocation      |             | MMRC0191 | Treated            |
| GABRB2   | 5   | 160819394         |          |     |                   | Nonsense           | W91*        | MMRC0390 | Treated            |
| GABRB3   | 15  | 24344125          |          |     |                   | Missense           | D444N       | MMRC0412 | Treated            |
| GABRG1   | 4   | 45762306          |          |     |                   | Missense           | K125T       | MMRC0322 | Untreated          |
| GABRG1   | 4   | 45761281          |          |     |                   | Missense           | E187K       | MMRC0389 | Treated            |
| GABRR3   | 3   | 99213914          |          |     |                   | Missense           | R165H       | MMRC0356 | Untreated          |
| GAL3ST3  | 11  | 65567324          |          |     |                   | Missense           | P176A       | MMRC0329 | Treated            |
| GALNT9   | 12  | 131319962(+)      |          | 17  | 67973231(+)       | Translocation      |             | MMRC0242 | Treated            |
| GALNTL4  | 11  | 11271295          |          |     |                   | Nonsense           | Q512*       | MMRC0329 | Treated            |
| GAS2L3   | 12  | 99540293          |          |     |                   | Splice site        | R252_splice | MMRC0406 | Untreated          |
| GCET2    | 3   | 17806021(-)       |          | 3   | 113325891(-)      | Long range         |             | MMRC0343 | Treated            |
| GCET2    | 3   | 113325271         |          |     |                   | Nonsense           | Y86*        | MMRC0408 | Untreated          |
| GHR      | 5   | 33269949(+)       |          | 5   | 42718868(-)       | Long range         |             | MMRC0335 | Treated            |
| GIT1     | 17  | 24928298          |          |     |                   | Missense           | S368G       | MMRC0389 | Treated            |
| GJB4     | 1   | 35000047          |          |     |                   | Missense           | L202R       | MMRC0308 | Treated            |
| GJD2     | 15  | 32832230          |          |     |                   | Missense           | C236Y       | MMRC0329 | Treated            |
| GLB1L2   | 11  | 133744914         |          |     |                   | Missense           | D345N       | MMRC0344 | Treated            |
| GLIPR1L2 | 12  | 74103057          |          |     |                   | Missense           | M231L       | MMRC0284 | Untreated          |
| GLP2R    | 17  | 9677917           |          |     |                   | Missense           | D86E        | MMRC0173 | Treated            |
| GLRA1    | 5   | 151208817(-)      |          | 8   | 10438247(+)       | Translocation      |             | MMRC0387 | Untreated          |
| GLT6D1   | 9   | 137656168         |          |     |                   | Missense           | W143G       | MMRC0359 | Untreated          |
| GMCL1    | 2   | 69930294          |          |     |                   | Missense           | F284V       | MMRC0284 | Untreated          |
| GNAL     | 6   | 85388419(-)       |          | 18  | 11704387(-)       | Translocation      |             | MMRC0389 | Treated            |
| GNB3     | 12  | 6825177           |          |     |                   | Missense           | Y289S       | MMRC0383 | Treated            |
| GNMT     | 6   | 43038011          |          |     |                   | Missense           | K97R        | MMRC0308 | Treated            |
| GNPAT    | 1   | 229468482         |          |     |                   | Missense           | T291I       | MMRC0028 | Untreated          |
| GP2      | 16  | 20242741(-)       | PRKCB    | 16  | 23931582(+)       | Long range         |             | MMRC0344 | Treated            |
| GPATCH2  | 1   | 215860109         |          |     |                   | Missense           | G138W       | MMRC0359 | Untreated          |
| GPATCH2  | 1   | 215733075(+)      |          | 2   | 190451622(-)      | Translocation      |             | MMRC0343 | Treated            |
| GPATCH8  | 17  | 39848388(+)       |          | 17  | 39891813(-)       | Deletion           |             | MMRC0421 | Treated            |
| GPATCH8  | 17  | 39863458(+)       |          | 17  | 39902861(-)       | Deletion           |             | MMRC0332 | Treated            |
| GPC6     | 13  | 60893557(-)       |          | 13  | 93655919(-)       | Long range         |             | MMRC0392 | Treated            |
| GPC6     | 13  | 61358472(-)       |          | 13  | 92972239(-)       | Long range         |             | MMRC0392 | Treated            |
| GPC6     | 13  | 61381281(-)       |          | 13  | 93099690(+)       | Long range         |             | MMRC0392 | Treated            |
| GPD1     | 12  | 48785727          |          |     |                   | Missense           | S117A       | MMRC0173 | Treated            |
| GPI      | 19  | 39576490          |          |     |                   | Missense           | Q295K       | MMRC0286 | Untreated          |
| GPR109A  | 12  | 121753516         |          |     |                   | Missense           | R90C        | MMRC0356 | Untreated          |
| GPR109B  | 12  | 121766287         |          |     |                   | Missense           | I317M       | MMRC0004 | Untreated          |
| GPR112   | X   | 135256213         |          |     |                   | Missense           | S894R       | MMRC0173 | Treated            |
| GPR115   | 6   | 47783927          |          |     |                   | Missense           | D34E        | MMRC0173 | Treated            |

Supplementary Table 3 (continued)

| Gene      | Chr | Position (strand) | 2nd gene | Chr | Position (strand) | Type               | AA change  | Sample   | Previously treated |
|-----------|-----|-------------------|----------|-----|-------------------|--------------------|------------|----------|--------------------|
| GPR143    | X   | 9667654           |          |     |                   | Missense           | S331T      | MMRC0173 | Treated            |
| GPR155    | 2   | 174551041(+)      |          | 2   | 175014250(-)      | Deletion           |            | MMRC0332 | Treated            |
| GPR158    | 10  | 25901622          |          |     |                   | Missense           | I518T      | MMRC0028 | Untreated          |
| GPR83     | 11  | 93753016          |          |     |                   | Missense           | Q407E      | MMRC0332 | Treated            |
| GPR98     | 5   | 90021565          |          |     |                   | Missense           | E2208K     | MMRC0191 | Treated            |
| GPR98     | 5   | 90086696          |          |     |                   | Missense           | E3840K     | MMRC0412 | Treated            |
| GPRC6A    | 6   | 117220698         |          |     |                   | Missense           | L694S      | MMRC0343 | Treated            |
| GPRIN2    | 10  | 46420033          |          |     |                   | Nonsense           | R383*      | MMRC0308 | Treated            |
| GRB2      | 4   | 89357014(-)       |          | 17  | 70835809(+)       | Translocation      |            | MMRC0191 | Treated            |
| GRIA2     | 4   | 158462134         |          |     |                   | Missense           | K225T      | MMRC0282 | Treated            |
| GRIA4     | 11  | 104659366(+)      |          | 11  | 105191433(-)      | Deletion           |            | MMRC0338 | Untreated          |
| GRID1     | 10  | 87363311          |          |     |                   | Missense           | D812Y      | MMRC0284 | Untreated          |
| GRID1     | 10  | 87618868          |          |     |                   | Missense           | R277M      | MMRC0383 | Treated            |
| GRID1     | 10  | 87369647          |          |     |                   | Missense           | A773S      | MMRC0390 | Treated            |
| GRID1     | 8   | 49728873(-)       |          | 10  | 87939728(-)       | Translocation      |            | MMRC0191 | Treated            |
| GRIK1     | 21  | 29849375          |          |     |                   | Missense           | E826Q      | MMRC0286 | Untreated          |
| GRIK2     | 6   | 101469309(+)      |          | 6   | 102332800(-)      | Deletion           |            | MMRC0421 | Treated            |
| GRIP1     | 12  | 65221917          |          |     |                   | Missense           | D73N       | MMRC0286 | Untreated          |
| GRM7      | 3   | 7163215           |          |     |                   | Missense           | V199A      | MMRC0242 | Treated            |
| GRM7      | 3   | 7588164(+)        | C18orf34 | 18  | 28973325(+)       | Translocation      |            | MMRC0309 | Untreated          |
| GRM8      | 7   | 126197269         |          |     |                   | Missense           | A415T      | MMRC0389 | Treated            |
| GSTO2     | 10  | 106029219         |          |     |                   | Missense           | E156D      | MMRC0309 | Untreated          |
| GTF2F2    | 13  | 44701741(+)       | SIAH3    | 13  | 45285735(+)       | Inversion          |            | MMRC0392 | Treated            |
| GTF3C1    | 16  | 19002992(+)       |          | 16  | 27392966(+)       | Long range         |            | MMRC0344 | Treated            |
| GUCY1A2   | 11  | 106354736(-)      |          | 11  | 130034355(+)      | Long range         |            | MMRC0338 | Untreated          |
| H2AFY2    | 10  | 71523528          |          |     |                   | Missense           | T170S      | MMRC0028 | Untreated          |
| HAO1      | 20  | 7814483           |          |     |                   | Missense           | A281V      | MMRC0322 | Untreated          |
| HAS2      | 8   | 122698594         |          |     |                   | Missense           | S221T      | MMRC0343 | Treated            |
| HCFC2     | 12  | 103016264         |          |     |                   | Nonsense           | S585*      | MMRC0389 | Treated            |
| HCLS1     | 3   | 122834005         |          |     |                   | In frame insertion | P368>PEPEP | MMRC0173 | Treated            |
| HCN1      | 5   | 19981971(+)       |          | 5   | 45628215(-)       | Long range         |            | MMRC0344 | Treated            |
| HCN1      | 5   | 27587136(-)       |          | 5   | 45627949(+)       | Long range         |            | MMRC0344 | Treated            |
| HCN2      | 3   | 197328869(-)      |          | 19  | 563639(+)         | Translocation      |            | MMRC0343 | Treated            |
| HDAC9     | 7   | 18820223(+)       |          | 7   | 19816336(-)       | Deletion           |            | MMRC0392 | Treated            |
| HEATR5A   | 8   | 13898318(+)       |          | 14  | 30859784(-)       | Translocation      |            | MMRC0191 | Treated            |
| HECW1     | 7   | 43318040          |          |     |                   | Missense           | V61F       | MMRC0282 | Treated            |
| HECW1     | 7   | 43450980          |          |     |                   | Missense           | R562C      | MMRC0389 | Treated            |
| HEPHL1    | 11  | 93458977          |          |     |                   | Missense           | T685K      | MMRC0335 | Treated            |
| HES3      | 1   | 6227248           |          |     |                   | Nonsense           | Y45*       | MMRC0335 | Treated            |
| HEXB      | 5   | 74020966          |          |     |                   | Missense           | Q119H      | MMRC0191 | Treated            |
| HHIPL2    | 1   | 220782114         |          |     |                   | Missense           | I327M      | MMRC0216 | Untreated          |
| HIPK1     | 1   | 114310366         |          |     |                   | Missense           | T403I      | MMRC0344 | Treated            |
| HIST1H2AC | 6   | 26232749          |          |     |                   | Missense           | A104S      | MMRC0282 | Treated            |
| HIST1H3A  | 6   | 26128983          |          |     |                   | Missense           | A96V       | MMRC0425 | Untreated          |
| HIST1H4D  | 6   | 26297180          |          |     |                   | Missense           | I35T       | MMRC0173 | Treated            |
| HIVEP1    | 6   | 12248762(+)       |          | 23  | 83151704(-)       | Translocation      |            | MMRC0335 | Treated            |
| HIVEP3    | 1   | 41818588          |          |     |                   | Missense           | G1490S     | MMRC0408 | Untreated          |
| HKDC1     | 10  | 70675849          |          |     |                   | Missense           | K295M      | MMRC0335 | Treated            |
| HLA-A     | 6   | 30018667          |          |     |                   | Missense           | I76M       | MMRC0427 | Treated            |
| HLA-A     | 6   | 30018672          |          |     |                   | Missense           | Q78R       | MMRC0427 | Treated            |
| HMGCL     | 1   | 24016623          |          |     |                   | Missense           | D61G       | MMRC0191 | Treated            |
| HMGCR     | 5   | 74682861          |          |     |                   | Missense           | V385A      | MMRC0427 | Treated            |
| HMGCS2    | 1   | 120108530         |          |     |                   | Missense           | R116H      | MMRC0387 | Untreated          |
| HNF4A     | 20  | 42486171          |          |     |                   | Missense           | R331H      | MMRC0329 | Treated            |
| HNMT      | 2   | 138484576(+)      |          | 2   | 138623739(-)      | Deletion           |            | MMRC0421 | Treated            |
| HNRNPUL2  | 11  | 62247643          |          |     |                   | Missense           | E295K      | MMRC0389 | Treated            |
| HOXD13    | 2   | 176667595         |          |     |                   | Missense           | R308H      | MMRC0308 | Treated            |
| HPD       | 12  | 120779655         |          |     |                   | Missense           | S54T       | MMRC0322 | Untreated          |
| HPSE2     | 5   | 40850563(+)       |          | 10  | 100720127(-)      | Translocation      |            | MMRC0191 | Treated            |
| HRH4      | 18  | 20310982          |          |     |                   | Missense           | Q123K      | MMRC0004 | Untreated          |
| HS2ST1    | 1   | 87330920          |          |     |                   | Nonsense           | R190*      | MMRC0322 | Untreated          |
| HS3ST4    | 16  | 17023278(-)       |          | 16  | 25797138(-)       | Long range         |            | MMRC0344 | Treated            |
| HS3ST4    | 16  | 24294544(+)       |          | 16  | 25813970(+)       | Long range         |            | MMRC0344 | Treated            |
| HS6ST3    | 13  | 96283082          |          |     |                   | Missense           | A349P      | MMRC0389 | Treated            |
| HSD17B1   | 17  | 37959117          |          |     |                   | Missense           | G134S      | MMRC0389 | Treated            |
| HSP90AB1  | 6   | 44328839          |          |     |                   | Missense           | R604Q      | MMRC0390 | Treated            |
| HSPA4     | 5   | 132431102         |          |     |                   | Missense           | L87R       | MMRC0338 | Untreated          |

Supplementary Table 3 (continued)



| Gene     | Chr | Position (strand) | 2nd gene | Chr | Position (strand) | Type               | AA change    | Sample   | Previously treated |
|----------|-----|-------------------|----------|-----|-------------------|--------------------|--------------|----------|--------------------|
| HSPA8    | 11  | 122377330(+)      |          | 11  | 122436746(-)      | Deletion           |              | MMRC0191 | Treated            |
| HTR1A    | 5   | 63292924          |          |     |                   | Missense           | L127V        | MMRC0308 | Treated            |
| HTR3D    | 3   | 185239345         |          |     |                   | Missense           | S418L        | MMRC0308 | Treated            |
| IARS     | 9   | 94031231          |          |     |                   | Splice site        | G1095_splice | MMRC0191 | Treated            |
| IBTK     | 6   | 83006718          |          |     |                   | Missense           | D69N         | MMRC0421 | Treated            |
| IDE      | 10  | 94292538(+)       |          | 10  | 94301591(-)       | Deletion           |              | MMRC0389 | Treated            |
| IDE      | 10  | 94284405          |          |     |                   | Missense           | H134P        | MMRC0343 | Treated            |
| IDH3A    | 15  | 76248382          |          |     |                   | Nonsense           | R361*        | MMRC0383 | Treated            |
| IFFO2    | 1   | 19136695(-)       | ST3GAL3  | 1   | 44136921(+)       | Long range         |              | MMRC0191 | Treated            |
| IFI44    | 1   | 78898899          |          |     |                   | Missense           | I362T        | MMRC0319 | Untreated          |
| IFNAR2   | 21  | 33541667(+)       |          | 21  | 33543218(+)       | Inversion          |              | MMRC0338 | Untreated          |
| IFT122   | 3   | 130721131         |          |     |                   | Missense           | V1109L       | MMRC0389 | Treated            |
| IGF1R    | 15  | 97283159          |          |     |                   | Missense           | V821I        | MMRC0308 | Treated            |
| IGF2BP1  | 17  | 44470556          |          |     |                   | Missense           | Q143H        | MMRC0284 | Untreated          |
| IGSF3    | 1   | 116923808         |          |     |                   | Missense           | D1021E       | MMRC0216 | Untreated          |
| IGSF3    | 1   | 116923808         |          |     |                   | Missense           | D1021E       | MMRC0322 | Untreated          |
| IGSF5    | 21  | 40059472          |          |     |                   | Missense           | V81I         | MMRC0028 | Untreated          |
| IHH      | 2   | 219628513         |          |     |                   | Missense           | Q299R        | MMRC0329 | Treated            |
| IKBIP    | 12  | 97531523          |          |     |                   | Missense           | E342K        | MMRC0319 | Untreated          |
| IKBKB    | 8   | 42283051          |          |     |                   | Missense           | K171E        | MMRC0427 | Treated            |
| IL10RA   | 11  | 117375238         |          |     |                   | Missense           | T470R        | MMRC0309 | Untreated          |
| IL1RL2   | 2   | 102171968         |          |     |                   | Missense           | D20G         | MMRC0390 | Treated            |
| IL24     | 1   | 205142030         |          |     |                   | Missense           | A176E        | MMRC0335 | Treated            |
| IL4R     | 16  | 27204079(+)       |          | 16  | 27270827(-)       | Deletion           |              | MMRC0392 | Treated            |
| IL6ST    | 5   | 55280693(-)       |          | 5   | 55295034(+)       | Tandem duplication |              | MMRC0191 | Treated            |
| ILDR2    | 1   | 165161836(+)      | USH2A    | 1   | 213992413(-)      | Long range         |              | MMRC0191 | Treated            |
| IMMP2L   | 7   | 110426992(-)      |          | 7   | 114862969(-)      | Long range         |              | MMRC0191 | Treated            |
| IMP5     | 17  | 41278774          |          |     |                   | Missense           | K241M        | MMRC0322 | Untreated          |
| INO80    | 15  | 39153881          |          |     |                   | Missense           | N436Y        | MMRC0242 | Treated            |
| INO80D   | 2   | 206615660(-)      |          | 11  | 43948564(-)       | Translocation      |              | MMRC0191 | Treated            |
| INSR     | 19  | 7123394           |          |     |                   | Missense           | S392L        | MMRC0308 | Treated            |
| INTS12   | 4   | 106823393         |          |     |                   | Missense           | M445I        | MMRC0389 | Treated            |
| INTS4    | 11  | 77272573          |          |     |                   | Missense           | R889L        | MMRC0343 | Treated            |
| IPMK     | 10  | 57784079(+)       |          | 10  | 59628825(+)       | Long range         |              | MMRC0425 | Untreated          |
| IPMK     | 10  | 57784853(-)       |          | 10  | 59628838(-)       | Long range         |              | MMRC0425 | Untreated          |
| IPPK     | 9   | 94451674          |          |     |                   | Missense           | S99F         | MMRC0392 | Treated            |
| IRF4     | 6   | 339972            |          |     |                   | Missense           | K123R        | MMRC0390 | Treated            |
| IRF4     | 6   | 339972            |          |     |                   | Missense           | K123R        | MMRC0423 | Treated            |
| IRF8     | 16  | 84504299          |          |     |                   | Missense           | R170Q        | MMRC0322 | Untreated          |
| IRGC     | 19  | 48915458          |          |     |                   | Missense           | R303H        | MMRC0347 | Untreated          |
| IRX5     | 16  | 53522742          |          |     |                   | Missense           | A44V         | MMRC0028 | Untreated          |
| ISPD     | 7   | 16284326          |          |     |                   | Missense           | K296Q        | MMRC0332 | Treated            |
| ISPD     | 7   | 16412368          |          |     |                   | Missense           | R126H        | MMRC0387 | Untreated          |
| ITFG1    | 16  | 46020294          |          |     |                   | Missense           | P193S        | MMRC0406 | Untreated          |
| ITGA10   | 1   | 144239081         |          |     |                   | Nonsense           | W55*         | MMRC0389 | Treated            |
| ITGAE    | 17  | 3611959           |          |     |                   | Missense           | L105W        | MMRC0389 | Treated            |
| ITGB1    | 6   | 129195685(-)      |          | 10  | 33244408(+)       | Translocation      |              | MMRC0319 | Untreated          |
| ITGB1BP3 | 19  | 3890920           |          |     |                   | Missense           | R116C        | MMRC0322 | Untreated          |
| ITGB6    | 2   | 160702875         |          |     |                   | Missense           | G397S        | MMRC0406 | Untreated          |
| ITGB6    | 1   | 99682944(-)       |          | 2   | 160751148(-)      | Translocation      |              | MMRC0242 | Treated            |
| ITIH5L   | X   | 54798187          |          |     |                   | Missense           | G1064W       | MMRC0319 | Untreated          |
| ITIH5L   | X   | 54794283          |          |     |                   | Missense           | P1203R       | MMRC0173 | Treated            |
| IVNS1ABP | 1   | 183536017         |          |     |                   | Missense           | D442N        | MMRC0344 | Treated            |
| JAG2     | 14  | 104683150         |          |     |                   | Missense           | R934H        | MMRC0242 | Treated            |
| JAK2     | 9   | 5067542           |          |     |                   | Missense           | E652K        | MMRC0242 | Treated            |
| JAKMIP3  | 10  | 133816510         |          |     |                   | Missense           | A687V        | MMRC0383 | Treated            |
| JAM3     | 11  | 91489467(+)       |          | 11  | 133499676(+)      | Long range         |              | MMRC0338 | Untreated          |
| JMJD4    | 1   | 225986811         |          |     |                   | Missense           | D433N        | MMRC0191 | Treated            |
| JUND     | 19  | 18252535          |          |     |                   | Missense           | E254K        | MMRC0308 | Treated            |
| KCNA4    | 11  | 29990511          |          |     |                   | Nonsense           | Y97*         | MMRC0309 | Untreated          |
| KCNC1    | 11  | 17750190          |          |     |                   | Missense           | T325A        | MMRC0028 | Untreated          |
| KCNH1    | 1   | 209364145(+)      |          | 1   | 209364915(-)      | Deletion           |              | MMRC0408 | Untreated          |
| KCNH4    | 17  | 37583717          |          |     |                   | Missense           | R171L        | MMRC0335 | Treated            |
| KCNH5    | 14  | 62244770          |          |     |                   | Missense           | Q726E        | MMRC0389 | Treated            |
| KCNH7    | 2   | 163401353         |          |     |                   | Missense           | A83S         | MMRC0338 | Untreated          |
| KCNJ12   | 17  | 21259375          |          |     |                   | Missense           | R43H         | MMRC0335 | Treated            |
| KCNT2    | 1   | 194562479         |          |     |                   | Missense           | L756S        | MMRC0322 | Untreated          |
| KCTD1    | 18  | 22293888          |          |     |                   | Splice site        | D104_splice  | MMRC0406 | Untreated          |
| KCTD17   | 22  | 35785309          |          |     |                   | Missense           | I173T        | MMRC0356 | Untreated          |

Supplementary Table 3 (continued)

| Gene      | Chr | Position (strand) | 2nd gene | Chr | Position (strand) | Type                 | AA change | Sample   | Previously treated |
|-----------|-----|-------------------|----------|-----|-------------------|----------------------|-----------|----------|--------------------|
| KCTD19    | 16  | 65885137          |          |     |                   | Missense             | A677S     | MMRC0191 | Treated            |
| KCTD7     | 7   | 65735278(-)       |          | 23  | 20321462(-)       | Translocation        |           | MMRC0309 | Untreated          |
| KDM3B     | 5   | 137765194(+)      |          | 8   | 42489268(+)       | Translocation        |           | MMRC0344 | Treated            |
| KDM3B     | 5   | 137767569(-)      |          | 8   | 42487492(-)       | Translocation        |           | MMRC0344 | Treated            |
| KDM3B     | 5   | 137769281(+)      |          | 8   | 42487795(+)       | Translocation        |           | MMRC0344 | Treated            |
| KDM6A     | X   | 44834083          |          |     |                   | Missense             | C1234G    | MMRC0332 | Treated            |
| KHDRBS3   | 8   | 136493662(+)      |          | 8   | 136597182(-)      | Deletion             |           | MMRC0421 | Treated            |
| KIAA0100  | 17  | 23990586          |          |     |                   | Missense             | S368L     | MMRC0389 | Treated            |
| KIAA0125  | 14  | 105400359(+)      |          | 14  | 105453725(-)      | Deletion             |           | MMRC0408 | Untreated          |
| KIAA0182  | 16  | 84262123          |          |     |                   | Missense             | V1042G    | MMRC0191 | Treated            |
| KIAA0319  | 6   | 24659718          |          |     |                   | Missense             | K988T     | MMRC0329 | Treated            |
| KIAA0319L | 1   | 35682448          |          |     |                   | Missense             | I853L     | MMRC0332 | Treated            |
| KIAA0391  | 14  | 34662805          |          |     |                   | Missense             | M201I     | MMRC0286 | Untreated          |
| KIAA0556  | 12  | 91590012(+)       |          | 16  | 27528637(-)       | Translocation        |           | MMRC0375 | Treated            |
| KIAA0802  | 18  | 8815103           |          |     |                   | Missense             | V1199M    | MMRC0359 | Untreated          |
| KIAA0922  | 4   | 154614335(+)      |          | 8   | 28506098(+)       | Translocation        |           | MMRC0335 | Treated            |
| KIAA1009  | 6   | 84909851(+)       |          | 6   | 85035429(+)       | Inversion            |           | MMRC0191 | Treated            |
| KIAA1009  | 6   | 84895756(-)       | ADK      | 10  | 75782773(-)       | Translocation        |           | MMRC0191 | Treated            |
| KIAA1024  | 15  | 77535890          |          |     |                   | Missense             | E116K     | MMRC0381 | Untreated          |
| KIAA1109  | 4   | 123488211         |          |     |                   | Missense             | T4319I    | MMRC0329 | Treated            |
| KIAA1244  | 2   | 64689541(+)       |          | 6   | 138624939(+)      | Translocation        |           | MMRC0343 | Treated            |
| KIAA1279  | 10  | 70430283          |          |     |                   | Missense             | E175V     | MMRC0381 | Untreated          |
| KIAA1409  | 14  | 93153362          |          |     |                   | Missense             | R1218W    | MMRC0338 | Untreated          |
| KIAA1467  | 12  | 13102703          |          |     |                   | Missense             | R162H     | MMRC0308 | Treated            |
| KIAA1468  | 18  | 58093609          |          |     |                   | Missense             | L964V     | MMRC0381 | Untreated          |
| KIAA1486  | 2   | 226155904         |          |     |                   | Missense             | S509R     | MMRC0376 | Untreated          |
| KIAA1614  | 1   | 179162140(+)      |          | 1   | 179174736(-)      | Deletion             |           | MMRC0392 | Treated            |
| KIAA1755  | 20  | 36285373          |          |     |                   | Missense             | D750G     | MMRC0359 | Untreated          |
| KIAA1755  | 13  | 60129309(-)       |          | 20  | 36297694(+)       | Translocation        |           | MMRC0191 | Treated            |
| KIF1A     | 2   | 241314929         |          |     |                   | Missense             | S1269F    | MMRC0383 | Treated            |
| KIF3C     | 2   | 26032731          |          |     |                   | Missense             | Q544H     | MMRC0387 | Untreated          |
| KIF6      | 6   | 39433094          |          |     |                   | Missense             | T706M     | MMRC0335 | Treated            |
| KIFC1     | 6   | 33479716          |          |     |                   | Missense             | Q196H     | MMRC0335 | Treated            |
| KIR2DS4   | 19  | 60042774          |          |     |                   | Missense             | SS150>ST  | MMRC0284 | Untreated          |
| KIRREL3   | 11  | 126043158(+)      |          | 11  | 126701882(-)      | Deletion             |           | MMRC0343 | Treated            |
| KLHL6     | 3   | 184755845         |          |     |                   | Missense             | F97L      | MMRC0308 | Treated            |
| KLK15     | 19  | 56022207          |          |     |                   | Missense             | E74K      | MMRC0389 | Treated            |
| KLK9      | 19  | 56198824          |          |     |                   | Missense             | S184L     | MMRC0381 | Untreated          |
| KLRC2     | 12  | 10479798          |          |     |                   | Missense             | R19W      | MMRC0191 | Treated            |
| KRAS      | 12  | 25271542          |          |     |                   | Missense             | Q61H      | MMRC0004 | Untreated          |
| KRAS      | 12  | 25269829          |          |     |                   | Missense             | A146T     | MMRC0282 | Treated            |
| KRAS      | 12  | 25271535          |          |     |                   | Missense             | Y64D      | MMRC0308 | Treated            |
| KRAS      | 12  | 25289529          |          |     |                   | Missense             | L19F      | MMRC0329 | Treated            |
| KRAS      | 12  | 25269829          |          |     |                   | Missense             | A146T     | MMRC0332 | Treated            |
| KRAS      | 12  | 25269914          |          |     |                   | Missense             | K117N     | MMRC0338 | Untreated          |
| KRAS      | 12  | 25271542          |          |     |                   | Missense             | Q61H      | MMRC0359 | Untreated          |
| KRAS      | 12  | 25271538          |          |     |                   | Missense             | E63K      | MMRC0381 | Untreated          |
| KRAS      | 12  | 25289548          |          |     |                   | Missense             | G13D      | MMRC0406 | Untreated          |
| KRAS      | 12  | 25269829          |          |     |                   | Missense             | A146T     | MMRC0408 | Untreated          |
| KRBA2     | 17  | 8210763(-)        |          | 17  | 8214067(-)        | Inversion            |           | MMRC0392 | Treated            |
| KRBA2     | 17  | 8214118           |          |     |                   | Missense             | E180K     | MMRC0392 | Treated            |
| KRT31     | 17  | 36805031          |          |     |                   | Frame shift deletion | E285fs    | MMRC0173 | Treated            |
| KSR2      | 12  | 116519582(+)      |          | 17  | 67520926(-)       | Translocation        |           | MMRC0383 | Treated            |
| LAMA2     | 6   | 129241534(+)      |          | 6   | 129397206(-)      | Deletion             |           | MMRC0332 | Treated            |
| LAMA4     | 6   | 112635034         |          |     |                   | Missense             | C101W     | MMRC0322 | Untreated          |
| LAMA4     | 6   | 112619741         |          |     |                   | Missense             | A170S     | MMRC0406 | Untreated          |
| LAMA5     | 20  | 60345216          |          |     |                   | Missense             | G729V     | MMRC0173 | Treated            |
| LAMB1     | 7   | 107414014         |          |     |                   | Nonsense             | R152*     | MMRC0427 | Treated            |
| LAMB2     | 3   | 49135612          |          |     |                   | Missense             | S1394F    | MMRC0286 | Untreated          |
| LAMC3     | 9   | 132904156         |          |     |                   | Missense             | H354P     | MMRC0423 | Treated            |
| LARS2     | 3   | 45417370(-)       |          | 12  | 99765359(+)       | Translocation        |           | MMRC0376 | Untreated          |
| LASS3     | 15  | 98837769          |          |     |                   | Missense             | R138T     | MMRC0389 | Treated            |
| LCE3A     | 1   | 150862174         |          |     |                   | Nonsense             | C10*      | MMRC0173 | Treated            |
| LGALS3    | 14  | 54674555          |          |     |                   | Nonsense             | Q20*      | MMRC0335 | Treated            |
| LGR5      | 12  | 70123383(-)       |          | 19  | 47133190(+)       | Translocation        |           | MMRC0191 | Treated            |
| LILRA2    | 19  | 59778650          |          |     |                   | Missense             | K257N     | MMRC0335 | Treated            |
| LINGO2    | 9   | 27939072          |          |     |                   | Missense             | T533N     | MMRC0343 | Treated            |
| LINGO4    | 1   | 150041224         |          |     |                   | Missense             | T194I     | MMRC0423 | Treated            |
| LIPC      | 15  | 56640364          |          |     |                   | Missense             | Y354F     | MMRC0335 | Treated            |

Supplementary Table 3 (continued)



| Gene     | Chr | Position (strand) | 2nd gene | Chr | Position (strand) | Type          | AA change   | Sample   | Previously treated |
|----------|-----|-------------------|----------|-----|-------------------|---------------|-------------|----------|--------------------|
| LIPC     | 8   | 114544567(+)      |          | 15  | 56586588(-)       | Translocation |             | MMRC0309 | Untreated          |
| LIX1L    | 1   | 144203617         |          |     |                   | Missense      | R161L       | MMRC0329 | Treated            |
| LMBR1L   | 12  | 47778142          |          |     |                   | Missense      | F418L       | MMRC0383 | Treated            |
| LMO2     | 11  | 33842783          |          |     |                   | Missense      | E135D       | MMRC0335 | Treated            |
| LMOD3    | 3   | 69250793          |          |     |                   | Missense      | M468T       | MMRC0425 | Untreated          |
| LNP1     | 3   | 101631363         |          |     |                   | Missense      | R34W        | MMRC0344 | Treated            |
| LOH12CR1 | 12  | 12425720(+)       | C12orf11 | 12  | 26958462(-)       | Long range    |             | MMRC0421 | Treated            |
| LOXL2    | 8   | 23235653          |          |     |                   | Missense      | G413R       | MMRC0308 | Treated            |
| LPO      | 2   | 34043266(-)       |          | 17  | 53689430(+)       | Translocation |             | MMRC0344 | Treated            |
| LRIG3    | 12  | 57594383          |          |     |                   | Missense      | D20Y        | MMRC0309 | Untreated          |
| LRMP     | 12  | 25133277(+)       | CASC1    | 12  | 25165289(+)       | Inversion     |             | MMRC0344 | Treated            |
| LRMP     | 12  | 25134396          |          |     |                   | Missense      | E202Q       | MMRC0344 | Treated            |
| LRMP     | 12  | 25134330          |          |     |                   | Nonsense      | E180*       | MMRC0344 | Treated            |
| LRMP     | 12  | 25133858(-)       | PRKCB    | 16  | 23889173(+)       | Translocation |             | MMRC0344 | Treated            |
| LRMP     | 12  | 25135141(+)       | PRKCB    | 16  | 23867717(+)       | Translocation |             | MMRC0344 | Treated            |
| LRP1B    | 2   | 141586373(+)      |          | 2   | 141707595(-)      | Deletion      |             | MMRC0421 | Treated            |
| LRP1B    | 2   | 141614994(-)      |          | 2   | 221292668(+)      | Long range    |             | MMRC0375 | Treated            |
| LRP1B    | 2   | 141424323         |          |     |                   | Missense      | N1029K      | MMRC0376 | Untreated          |
| LRP1B    | 2   | 140824905         |          |     |                   | Missense      | F3941L      | MMRC0425 | Untreated          |
| LRP1B    | 2   | 140931690         |          |     |                   | Missense      | V3209A      | MMRC0425 | Untreated          |
| LRP1B    | 2   | 142098906(-)      |          | 18  | 71609703(-)       | Translocation |             | MMRC0191 | Treated            |
| LRP2     | 2   | 169885550         |          |     |                   | Missense      | A57V        | MMRC0406 | Untreated          |
| LRP6     | 12  | 12208550          |          |     |                   | Missense      | T659I       | MMRC0028 | Untreated          |
| LRP8     | 1   | 53463794(+)       |          | 1   | 53490546(-)       | Deletion      |             | MMRC0319 | Untreated          |
| LRRC16A  | 6   | 25689503          |          |     |                   | Missense      | D955Y       | MMRC0343 | Treated            |
| LRRC36   | 16  | 65941637          |          |     |                   | Missense      | T53A        | MMRC0412 | Treated            |
| LRRC41   | 1   | 46523909          |          |     |                   | Missense      | R403C       | MMRC0028 | Untreated          |
| LRRC4C   | 11  | 40093586          |          |     |                   | Missense      | N278I       | MMRC0344 | Treated            |
| LRRIQ3   | 1   | 74421820          |          |     |                   | Nonsense      | L46*        | MMRC0335 | Treated            |
| LRRK2    | 12  | 38918064          |          |     |                   | Missense      | E155K       | MMRC0286 | Untreated          |
| LRRK2    | 12  | 38994132          |          |     |                   | Missense      | I1543S      | MMRC0344 | Treated            |
| LRRK2    | 12  | 38953506(+)       |          | 18  | 8522903(+)        | Translocation |             | MMRC0376 | Untreated          |
| LRRK2    | 12  | 38953703(-)       |          | 18  | 8522979(-)        | Translocation |             | MMRC0376 | Untreated          |
| LRRN3    | 7   | 110551713         |          |     |                   | Missense      | S550C       | MMRC0191 | Treated            |
| LRRN3    | 7   | 110551428         |          |     |                   | Missense      | Y455F       | MMRC0322 | Untreated          |
| LRTM2    | 12  | 1813952           |          |     |                   | Missense      | R306Q       | MMRC0347 | Untreated          |
| LSM14A   | 19  | 39398045          |          |     |                   | Missense      | A239T       | MMRC0329 | Treated            |
| LSM14A   | 19  | 39402623          |          |     |                   | Splice site   | R379_splice | MMRC0412 | Treated            |
| LUC7L3   | 17  | 46177079          |          |     |                   | Missense      | I200T       | MMRC0322 | Untreated          |
| LUM      | 12  | 90026794          |          |     |                   | Missense      | Q32E        | MMRC0322 | Untreated          |
| LY6H     | 8   | 144311151         |          |     |                   | Missense      | C105Y       | MMRC0381 | Untreated          |
| LYPD4    | 19  | 47033866          |          |     |                   | Missense      | T174I       | MMRC0344 | Treated            |
| LYST     | 1   | 233942040         |          |     |                   | Missense      | D3289N      | MMRC0028 | Untreated          |
| LZTR1    | 22  | 19673082          |          |     |                   | Missense      | P172T       | MMRC0329 | Treated            |
| MAB21L2  | 4   | 151724005         |          |     |                   | Missense      | A125E       | MMRC0335 | Treated            |
| MACF1    | 1   | 39438098(-)       | HNF1A    | 12  | 119911516(-)      | Translocation |             | MMRC0383 | Treated            |
| MAGEC1   | X   | 140821961         |          |     |                   | Missense      | P369S       | MMRC0356 | Untreated          |
| MAGED1   | X   | 51656630          |          |     |                   | Nonsense      | W380*       | MMRC0216 | Untreated          |
| MAGED1   | X   | 51655046          |          |     |                   | Nonsense      | S68*        | MMRC0173 | Treated            |
| MAGEL2   | 15  | 21441683          |          |     |                   | Missense      | A767V       | MMRC0309 | Untreated          |
| MAN1A1   | 6   | 119551411         |          |     |                   | Missense      | F526C       | MMRC0322 | Untreated          |
| MAN1A1   | 6   | 119664968         |          |     |                   | Splice site   | G234_splice | MMRC0335 | Treated            |
| MAOA     | X   | 43400553          |          |     |                   | Missense      | A7V         | MMRC0173 | Treated            |
| MAP1LC3B | 16  | 85993288          |          |     |                   | Missense      | I35V        | MMRC0390 | Treated            |
| MAP2K3   | 17  | 21144827          |          |     |                   | Missense      | D81N        | MMRC0421 | Treated            |
| MAP2K4   | 17  | 8032880(+)        |          | 17  | 11869941(-)       | Long range    |             | MMRC0392 | Treated            |
| MAP2K4   | 17  | 11890824(+)       |          | 17  | 14883729(-)       | Long range    |             | MMRC0392 | Treated            |
| MAP2K4   | 17  | 11946633(+)       |          | 17  | 14820955(+)       | Long range    |             | MMRC0392 | Treated            |
| MAP2K4   | 17  | 11956089(+)       |          | 17  | 14900582(-)       | Long range    |             | MMRC0392 | Treated            |
| MAP2K4   | 4   | 33914(+)          |          | 17  | 11909416(-)       | Translocation |             | MMRC0392 | Treated            |
| MAP2K4   | 17  | 11909171(+)       |          | 21  | 42321425(-)       | Translocation |             | MMRC0392 | Treated            |
| MAP2K4   | 17  | 11946955(-)       | DSCAM    | 21  | 40855018(-)       | Translocation |             | MMRC0392 | Treated            |
| MAP3K1   | 5   | 56209516(-)       |          | 8   | 42575852(+)       | Translocation |             | MMRC0344 | Treated            |
| MAP3K14  | 17  | 40720277(+)       |          | 17  | 40725216(-)       | Deletion      |             | MMRC0319 | Untreated          |
| MAP4K4   | 2   | 101814695         |          |     |                   | Missense      | P197S       | MMRC0343 | Treated            |
| MAPK4    | 18  | 46444433          |          |     |                   | Missense      | S36L        | MMRC0412 | Treated            |
| MARK2    | 11  | 63428833          |          |     |                   | Splice site   | S559_splice | MMRC0359 | Untreated          |
| MASP1    | 3   | 188486521         |          |     |                   | Missense      | Y8F         | MMRC0412 | Treated            |
| MATK     | 19  | 3736123           |          |     |                   | Missense      | R4Q         | MMRC0286 | Untreated          |

Supplementary Table 3 (continued)

| Gene     | Chr | Position (strand) | 2nd gene | Chr | Position (strand) | Type               | AA change   | Sample   | Previously treated |
|----------|-----|-------------------|----------|-----|-------------------|--------------------|-------------|----------|--------------------|
| MBD1     | 18  | 46053966          |          |     |                   | Missense           | G471A       | MMRC0383 | Treated            |
| MCART1   | 9   | 37877707          |          |     |                   | Missense           | I281V       | MMRC0390 | Treated            |
| MCF2L    | 13  | 112790041         |          |     |                   | Missense           | T876M       | MMRC0392 | Treated            |
| MCM4     | 8   | 49048122          |          |     |                   | Missense           | A694V       | MMRC0338 | Untreated          |
| MCTP2    | 15  | 92823262          |          |     |                   | Missense           | L878V       | MMRC0282 | Treated            |
| MCTS1    | X   | 119623420         |          |     |                   | Missense           | D48Y        | MMRC0406 | Untreated          |
| MDC1     | 6   | 30780239          |          |     |                   | Missense           | T1567I      | MMRC0173 | Treated            |
| MDM4     | 1   | 202780399         |          |     |                   | Missense           | Q262H       | MMRC0343 | Treated            |
| MDN1     | 6   | 90458942          |          |     |                   | Missense           | V3510M      | MMRC0282 | Treated            |
| ME3      | 11  | 85914611(-)       |          | 12  | 12973435(-)       | Translocation      |             | MMRC0383 | Treated            |
| MECOM    | 3   | 170697373(-)      | TMEM120B | 12  | 120666057(+)      | Translocation      |             | MMRC0383 | Treated            |
| MED26    | 19  | 16557098(+)       |          | 19  | 18275083(-)       | Long range         |             | MMRC0392 | Treated            |
| MEF2A    | 15  | 98070181          |          |     |                   | Missense           | I394M       | MMRC0309 | Untreated          |
| MEGF9    | 9   | 122493555         |          |     |                   | Missense           | A199V       | MMRC0406 | Untreated          |
| MELK     | 9   | 36587286          |          |     |                   | Missense           | K158R       | MMRC0004 | Untreated          |
| METAP2   | 12  | 94392090          |          |     |                   | Missense           | A2S         | MMRC0282 | Treated            |
| METTL2B  | 7   | 108718285(+)      |          | 7   | 127928372(-)      | Long range         |             | MMRC0191 | Treated            |
| METTL9   | 16  | 21531602          |          |     |                   | Missense           | H101Y       | MMRC0286 | Untreated          |
| MFN1     | 3   | 180559326         |          |     |                   | Missense           | S85R        | MMRC0389 | Treated            |
| MFSDBL   | 17  | 8642488           |          |     |                   | Missense           | S226T       | MMRC0242 | Treated            |
| MGA      | 15  | 39775090(+)       |          | 15  | 39784434(-)       | Deletion           |             | MMRC0392 | Treated            |
| MGA      | 15  | 39784934(+)       | EHD4     | 15  | 40032969(-)       | Deletion           |             | MMRC0332 | Treated            |
| MID2     | X   | 106970865         |          |     |                   | Missense           | R105H       | MMRC0335 | Treated            |
| MIPEP    | 13  | 23351435          |          |     |                   | Missense           | L171F       | MMRC0338 | Untreated          |
| MKRN3    | 15  | 21363470          |          |     |                   | Missense           | D483V       | MMRC0173 | Treated            |
| MLKL     | 16  | 73286702          |          |     |                   | Missense           | R152K       | MMRC0387 | Untreated          |
| MLL      | 11  | 117875341         |          |     |                   | Missense           | M2022I      | MMRC0308 | Treated            |
| MLL2     | 12  | 47702190          |          |     |                   | Missense           | H5475L      | MMRC0343 | Treated            |
| MLL2     | 12  | 47714190          |          |     |                   | Missense           | F3556S      | MMRC0173 | Treated            |
| MLL3     | 7   | 151557958         |          |     |                   | Missense           | Y987H       | MMRC0242 | Treated            |
| MLPH     | 2   | 238084372         |          |     |                   | Missense           | V112F       | MMRC0347 | Untreated          |
| MMP16    | 8   | 89128127          |          |     |                   | Missense           | Y459D       | MMRC0322 | Untreated          |
| MMP17    | 12  | 130893124(-)      | EP400    | 12  | 131045475(+)      | Tandem duplication |             | MMRC0387 | Untreated          |
| MOGAT3   | 7   | 100626060         |          |     |                   | Missense           | E305K       | MMRC0173 | Treated            |
| MON2     | 12  | 61181623          |          |     |                   | Missense           | L223F       | MMRC0308 | Treated            |
| MOXD1    | 6   | 132690948         |          |     |                   | Splice site        | G282_splice | MMRC0392 | Treated            |
| MPDZ     | 9   | 13128005          |          |     |                   | Missense           | G1384V      | MMRC0173 | Treated            |
| MPHOSPH9 | 12  | 122264308(+)      |          | 12  | 122273615(-)      | Deletion           |             | MMRC0335 | Treated            |
| MPL      | 1   | 43576423          |          |     |                   | Missense           | T49N        | MMRC0375 | Treated            |
| MPRIP    | 17  | 16738425(-)       |          | 17  | 16925310(+)       | Tandem duplication |             | MMRC0332 | Treated            |
| MRC2     | 17  | 58107608          |          |     |                   | Nonsense           | W606*       | MMRC0244 | Untreated          |
| MRE11A   | 11  | 90023122(-)       |          | 11  | 93829988(-)       | Long range         |             | MMRC0338 | Untreated          |
| MRPL15   | 8   | 55211768          |          |     |                   | Missense           | E85K        | MMRC0335 | Treated            |
| MRPS27   | 5   | 71559926          |          |     |                   | Missense           | A206V       | MMRC0376 | Untreated          |
| MRV11    | 11  | 10630174          |          |     |                   | Nonsense           | Q58*        | MMRC0412 | Treated            |
| MSL3     | X   | 11689608          |          |     |                   | Missense           | E92Q        | MMRC0332 | Treated            |
| MSRB3    | 12  | 64010867(-)       |          | 12  | 122274899(+)      | Long range         |             | MMRC0335 | Treated            |
| MSRB3    | 12  | 64004119(-)       | MPHOSPH9 | 12  | 122264416(-)      | Long range         |             | MMRC0335 | Treated            |
| MSRB3    | 12  | 63992556(+)       | TXNRD1   | 12  | 103180160(-)      | Long range         |             | MMRC0335 | Treated            |
| MSRB3    | 12  | 64013283(+)       | TXNRD1   | 12  | 103176369(+)      | Long range         |             | MMRC0335 | Treated            |
| MT1A     | 16  | 55231284          |          |     |                   | Missense           | C36F        | MMRC0375 | Treated            |
| MTDH     | 8   | 53819616(-)       |          | 8   | 98802054(+)       | Long range         |             | MMRC0343 | Treated            |
| MTDH     | 8   | 98802088(-)       |          | 8   | 128868323(-)      | Long range         |             | MMRC0343 | Treated            |
| MTMR1    | X   | 149649337         |          |     |                   | Missense           | GQ210>GP    | MMRC0244 | Untreated          |
| MTMR11   | 1   | 148169939         |          |     |                   | Missense           | R376H       | MMRC0282 | Treated            |
| MTMR2    | 11  | 95296028(+)       |          | 11  | 134024425(-)      | Long range         |             | MMRC0338 | Untreated          |
| MTR      | 1   | 235053847(+)      |          | 1   | 236285234(-)      | Long range         |             | MMRC0406 | Untreated          |
| MUC16    | 19  | 8863576           |          |     |                   | Missense           | K13414E     | MMRC0319 | Untreated          |
| MUC16    | 19  | 8945925           |          |     |                   | Missense           | S2297N      | MMRC0343 | Treated            |
| MUC16    | 19  | 8925540           |          |     |                   | Missense           | L7636I      | MMRC0412 | Treated            |
| MUC16    | 19  | 8945158           |          |     |                   | Missense           | G2553R      | MMRC0412 | Treated            |
| MUC17    | 7   | 100463930         |          |     |                   | Missense           | T838I       | MMRC0392 | Treated            |
| MUC2     | 11  | 1083295           |          |     |                   | Missense           | T1705I      | MMRC0392 | Treated            |
| MUC2     | 11  | 1083094           |          |     |                   | Missense           | V1638G      | MMRC0421 | Treated            |
| MUC21    | 6   | 31062393          |          |     |                   | Missense           | D154E       | MMRC0412 | Treated            |
| MUC6     | 11  | 1008462           |          |     |                   | Missense           | V1447I      | MMRC0329 | Treated            |
| MXRA5    | 6   | 13686616(-)       |          | X   | 3244036(+)        | Translocation      |             | MMRC0383 | Treated            |
| MYH10    | 17  | 7970180(+)        |          | 17  | 8377434(-)        | Deletion           |             | MMRC0392 | Treated            |
| MYH10    | 17  | 8406603(+)        |          | 17  | 8849242(+)        | Inversion          |             | MMRC0392 | Treated            |

Supplementary Table 3 (continued)

| Gene     | Chr | Position (strand) | 2nd gene | Chr | Position (strand) | Type               | AA change     | Sample   | Previously treated |
|----------|-----|-------------------|----------|-----|-------------------|--------------------|---------------|----------|--------------------|
| MYH10    | 17  | 8325800(+)        | NCOR1    | 17  | 15891328(-)       | Long range         |               | MMRC0392 | Treated            |
| MYH10    | 17  | 8413251(+)        | PIGL     | 17  | 16077806(-)       | Long range         |               | MMRC0392 | Treated            |
| MYH10    | 17  | 8348738           |          |     |                   | Missense           | R1169C        | MMRC0390 | Treated            |
| MYH10    | 17  | 8415436(-)        |          | 21  | 42325724(-)       | Translocation      |               | MMRC0392 | Treated            |
| MYH10    | 17  | 8406802(+)        | PDE9A    | 21  | 42952931(-)       | Translocation      |               | MMRC0392 | Treated            |
| MYH11    | 16  | 15765375(+)       |          | 16  | 15773834(+)       | Inversion          |               | MMRC0344 | Treated            |
| MYH11    | 16  | 15779710(+)       |          | 16  | 34645650(+)       | Long range         |               | MMRC0344 | Treated            |
| MYH11    | 3   | 77792962(-)       |          | 16  | 15799932(+)       | Translocation      |               | MMRC0191 | Treated            |
| MYH8     | 17  | 10244725          |          |     |                   | Missense           | E1148Q        | MMRC0421 | Treated            |
| MYO10    | 5   | 16754269          |          |     |                   | Missense           | A1079P        | MMRC0335 | Treated            |
| MYO18B   | 22  | 24730698          |          |     |                   | Missense           | I2116N        | MMRC0335 | Treated            |
| MYO18B   | 22  | 24577473          |          |     |                   | Missense           | R1271Q        | MMRC0344 | Treated            |
| MYO1C    | 17  | 1329657           |          |     |                   | Missense           | N298K         | MMRC0338 | Untreated          |
| MYO1E    | 15  | 57437976(+)       |          | 15  | 57475211(+)       | Inversion          |               | MMRC0344 | Treated            |
| MYO3A    | 10  | 26522184          |          |     |                   | Nonsense           | R1495*        | MMRC0028 | Untreated          |
| MYO5A    | 14  | 95299060(+)       |          | 15  | 50550021(-)       | Translocation      |               | MMRC0335 | Treated            |
| MYO6     | 6   | 76614846(+)       |          | 6   | 77319167(-)       | Deletion           |               | MMRC0421 | Treated            |
| MYO9A    | 15  | 69957446          |          |     |                   | Missense           | T1974P        | MMRC0286 | Untreated          |
| MYOCD    | 17  | 12581699(+)       | RICH2    | 17  | 12716278(-)       | Deletion           |               | MMRC0191 | Treated            |
| MYOF     | 10  | 95073029          |          |     |                   | Missense           | R1770Q        | MMRC0242 | Treated            |
| MYOM2    | 8   | 2064591           |          |     |                   | Missense           | Y1255C        | MMRC0427 | Treated            |
| MYOM3    | 1   | 24261151          |          |     |                   | Missense           | T1269M        | MMRC0338 | Untreated          |
| MYSM1    | 1   | 58920143          |          |     |                   | Missense           | Q387H         | MMRC0387 | Untreated          |
| MYT1     | 20  | 62341567          |          |     |                   | Missense           | M1035T        | MMRC0347 | Untreated          |
| N4BP1    | 16  | 47134504          |          |     |                   | Missense           | A835T         | MMRC0392 | Treated            |
| NAALADL2 | 3   | 176237088(+)      | THSD7A   | 7   | 11574366(+)       | Translocation      |               | MMRC0406 | Untreated          |
| NALCN    | 13  | 100744950(+)      | ITGBL1   | 13  | 101001082(-)      | Deletion           |               | MMRC0332 | Treated            |
| NALCN    | 13  | 100734313         |          |     |                   | Missense           | P369H         | MMRC0242 | Treated            |
| NAV2     | 11  | 20034002          |          |     |                   | Missense           | R1585Q        | MMRC0322 | Untreated          |
| NAV3     | 12  | 76924973          |          |     |                   | Missense           | K508N         | MMRC0412 | Treated            |
| NAV3     | 12  | 76912769          |          |     |                   | Missense           | K243E         | MMRC0427 | Treated            |
| NBAS     | 2   | 15224765          |          |     |                   | Nonsense           | W2325*        | MMRC0427 | Treated            |
| NBEA     | 13  | 35118474          |          |     |                   | Missense           | A2566T        | MMRC0412 | Treated            |
| NBN      | 8   | 91018479          |          |     |                   | Missense           | V729L         | MMRC0338 | Untreated          |
| NBPF16   | 1   | 147023078         |          |     |                   | Missense           | L595V         | MMRC0344 | Treated            |
| NBPF3    | 1   | 21679254          |          |     |                   | Missense           | D444E         | MMRC0329 | Treated            |
| NCAM2    | 21  | 21760803          |          |     |                   | Missense           | V554F         | MMRC0335 | Treated            |
| NCAPD3   | 11  | 133595759         |          |     |                   | Missense           | I46L          | MMRC0173 | Treated            |
| NCKAP1   | 2   | 183601903(+)      |          | 6   | 70370171(+)       | Translocation      |               | MMRC0309 | Untreated          |
| NCLN     | 19  | 3143630           |          |     |                   | Missense           | M116T         | MMRC0308 | Treated            |
| NCOA3    | 20  | 45714618          |          |     |                   | In frame deletion  | M1336_S1337>M | MMRC0004 | Untreated          |
| NCOR1    | 17  | 15910721(-)       | PIGL     | 17  | 16070205(-)       | Inversion          |               | MMRC0392 | Treated            |
| NCOR1    | 17  | 8172996(-)        |          | 17  | 15909891(+)       | Long range         |               | MMRC0392 | Treated            |
| NDRG3    | 20  | 34726791(+)       |          | 20  | 34733246(-)       | Deletion           |               | MMRC0387 | Untreated          |
| NDRG3    | 20  | 34766752(+)       |          | 20  | 34771458(+)       | Inversion          |               | MMRC0412 | Treated            |
| NDRG3    | 20  | 34757479(+)       |          | 20  | 48734587(-)       | Long range         |               | MMRC0387 | Untreated          |
| NDST4    | 4   | 116064910(+)      |          | 4   | 116233317(-)      | Deletion           |               | MMRC0421 | Treated            |
| NDUFA5   | 7   | 122969429         |          |     |                   | Nonsense           | Q111*         | MMRC0308 | Treated            |
| NDUFAF2  | 5   | 60385870(+)       | BAG4     | 8   | 38173841(+)       | Translocation      |               | MMRC0344 | Treated            |
| NEB      | 2   | 152092285         |          |     |                   | Missense           | P5553S        | MMRC0376 | Untreated          |
| NEB      | 2   | 152289034         |          |     |                   | Missense           | A200T         | MMRC0173 | Treated            |
| NEBL     | 10  | 21160467          |          |     |                   | Missense           | V501M         | MMRC0319 | Untreated          |
| NEBL     | 10  | 21187262          |          |     |                   | Missense           | D272E         | MMRC0421 | Treated            |
| NEDD1    | 12  | 95835636          |          |     |                   | Missense           | R113Q         | MMRC0286 | Untreated          |
| NEFH     | 22  | 28215638          |          |     |                   | Missense           | V670E         | MMRC0390 | Treated            |
| NEFM     | 8   | 24830678          |          |     |                   | Missense           | M93L          | MMRC0335 | Treated            |
| NES      | 1   | 154910509(-)      |          | 1   | 154942931(+)      | Tandem duplication |               | MMRC0242 | Treated            |
| NEURL4   | 17  | 7170770           |          |     |                   | Missense           | D359G         | MMRC0390 | Treated            |
| NFATC3   | 16  | 66806021(-)       | CDH1     | 16  | 67347328(+)       | Tandem duplication |               | MMRC0425 | Untreated          |
| NFIA     | 1   | 61435759(+)       | VAV3     | 1   | 108178920(-)      | Long range         |               | MMRC0408 | Untreated          |
| NFIB     | 9   | 14234848(-)       | C12orf42 | 12  | 102325833(-)      | Translocation      |               | MMRC0191 | Treated            |
| NID1     | 1   | 234278803         |          |     |                   | Missense           | D112G         | MMRC0390 | Treated            |
| NKAIN2   | 2   | 35385997(+)       |          | 6   | 124531546(+)      | Translocation      |               | MMRC0421 | Treated            |
| NKAIN2   | 2   | 35460209(-)       |          | 6   | 124551124(-)      | Translocation      |               | MMRC0421 | Treated            |
| NKAIN3   | 8   | 51306139(-)       |          | 8   | 63764015(+)       | Long range         |               | MMRC0344 | Treated            |
| NKAIN3   | 8   | 56102765(+)       |          | 8   | 63763970(-)       | Long range         |               | MMRC0344 | Treated            |
| NKAPL    | 6   | 28335421          |          |     |                   | Missense           | R98H          | MMRC0191 | Treated            |
| NLRP2    | 19  | 60186564(+)       |          | 19  | 60187365(+)       | Inversion          |               | MMRC0383 | Treated            |
| NLRP4    | 19  | 61061928          |          |     |                   | Missense           | V453M         | MMRC0338 | Untreated          |

Supplementary Table 3 (continued)

| Gene     | Chr | Position (strand) | 2nd gene | Chr | Position (strand) | Type               | AA change   | Sample   | Previously treated |
|----------|-----|-------------------|----------|-----|-------------------|--------------------|-------------|----------|--------------------|
| NLRP7    | 19  | 60104250(+)       |          | 19  | 60135890(-)       | Deletion           |             | MMRC0383 | Treated            |
| NLRP7    | 19  | 60135655(-)       |          | X   | 136757206(-)      | Translocation      |             | MMRC0383 | Treated            |
| NLRP8    | 19  | 61157859          |          |     |                   | Missense           | I208T       | MMRC0028 | Untreated          |
| NLRP8    | 19  | 61159220          |          |     |                   | Missense           | V662I       | MMRC0392 | Treated            |
| NNT      | 2   | 216780312(+)      |          | 5   | 43687830(-)       | Translocation      |             | MMRC0191 | Treated            |
| NOLC1    | 10  | 103902447(+)      | SMPD3    | 16  | 66962164(-)       | Translocation      |             | MMRC0390 | Treated            |
| NOM1     | 7   | 156439605         |          |     |                   | Missense           | L387Q       | MMRC0425 | Untreated          |
| NOS1     | 12  | 116194635         |          |     |                   | Missense           | Y593H       | MMRC0392 | Treated            |
| NOTCH2NL | 1   | 143964034(-)      | LCLAT1   | 2   | 30594834(-)       | Translocation      |             | MMRC0191 | Treated            |
| NOTCH4   | 6   | 32299637          |          |     |                   | In frame deletion  | L15_L16>L   | MMRC0319 | Untreated          |
| NPAS3    | 14  | 33332866          |          |     |                   | Missense           | G389V       | MMRC0356 | Untreated          |
| NPFFR2   | 4   | 73116661          |          |     |                   | Missense           | R60Q        | MMRC0359 | Untreated          |
| NPLOC4   | 17  | 77184284          |          |     |                   | Splice site        | K177_splice | MMRC0389 | Treated            |
| NPR2     | 9   | 35784002          |          |     |                   | Missense           | G259R       | MMRC0282 | Treated            |
| NPY2R    | 4   | 156355623         |          |     |                   | Missense           | K361R       | MMRC0344 | Treated            |
| NR2F2    | 15  | 94681737          |          |     |                   | Missense           | S223L       | MMRC0389 | Treated            |
| NR3C2    | 4   | 149400600         |          |     |                   | Missense           | F626C       | MMRC0308 | Treated            |
| NR3C2    | 4   | 149254800         |          |     |                   | Missense           | E785K       | MMRC0319 | Untreated          |
| NR6A1    | 9   | 126511745(+)      |          | 11  | 9633987(-)        | Translocation      |             | MMRC0387 | Untreated          |
| NRAS     | 1   | 115058052         |          |     |                   | Missense           | Q61R        | MMRC0244 | Untreated          |
| NRAS     | 1   | 115058051         |          |     |                   | Missense           | Q61H        | MMRC0284 | Untreated          |
| NRAS     | 1   | 115058053         |          |     |                   | Missense           | Q61K        | MMRC0319 | Untreated          |
| NRAS     | 1   | 115058052         |          |     |                   | Missense           | Q61R        | MMRC0343 | Treated            |
| NRAS     | 1   | 115058052         |          |     |                   | Missense           | Q61R        | MMRC0383 | Treated            |
| NRAS     | 1   | 115058052         |          |     |                   | Missense           | Q61R        | MMRC0390 | Treated            |
| NRAS     | 1   | 115058052         |          |     |                   | Missense           | Q61R        | MMRC0412 | Treated            |
| NRAS     | 1   | 115060268         |          |     |                   | Missense           | G13R        | MMRC0423 | Treated            |
| NRAS     | 1   | 115060268         |          |     |                   | Missense           | G13R        | MMRC0173 | Treated            |
| NRG1     | 8   | 32740315          |          |     |                   | Missense           | H433N       | MMRC0425 | Untreated          |
| NRG3     | 10  | 84384775(+)       |          | 10  | 84709572(-)       | Deletion           |             | MMRC0392 | Treated            |
| NRG3     | 10  | 84734905          |          |     |                   | Missense           | N552T       | MMRC0329 | Treated            |
| NRP2     | 2   | 206336664         |          |     |                   | Missense           | L689R       | MMRC0390 | Treated            |
| NRXN1    | 2   | 50256599(-)       |          | 2   | 70640059(+)       | Long range         |             | MMRC0309 | Untreated          |
| NRXN1    | 2   | 50317592          |          |     |                   | Missense           | S94C        | MMRC0322 | Untreated          |
| NRXN3    | 14  | 78821969(+)       |          | 14  | 79079626(-)       | Deletion           |             | MMRC0392 | Treated            |
| NRXN3    | 14  | 79100435(+)       |          | 14  | 79211468(-)       | Deletion           |             | MMRC0392 | Treated            |
| NRXN3    | 14  | 78959852(-)       |          | 14  | 79205866(-)       | Inversion          |             | MMRC0392 | Treated            |
| NRXN3    | 14  | 78825766(-)       |          | 14  | 78956817(+)       | Tandem duplication |             | MMRC0392 | Treated            |
| NRXN3    | 14  | 78947069(-)       |          | 14  | 79057415(+)       | Tandem duplication |             | MMRC0392 | Treated            |
| NRXN3    | 14  | 79101780(-)       |          | 14  | 79201916(+)       | Tandem duplication |             | MMRC0392 | Treated            |
| NSMCE2   | 8   | 126438008(+)      |          | 8   | 126454670(-)      | Deletion           |             | MMRC0392 | Treated            |
| NSMCE2   | 8   | 126386631(+)      |          | 8   | 128775537(-)      | Long range         |             | MMRC0343 | Treated            |
| NSMCE2   | 8   | 126387784(+)      |          | 8   | 128834720(+)      | Long range         |             | MMRC0392 | Treated            |
| NSUN2    | 5   | 6664174           |          |     |                   | Missense           | F374L       | MMRC0389 | Treated            |
| NT5C3L   | 17  | 37238614          |          |     |                   | Missense           | H166P       | MMRC0427 | Treated            |
| NTM      | 8   | 41188158(-)       |          | 11  | 130987563(+)      | Translocation      |             | MMRC0412 | Treated            |
| NTN1     | 17  | 8874232(-)        |          | 17  | 9062733(-)        | Inversion          |             | MMRC0392 | Treated            |
| NTN1     | 17  | 8931037(-)        | GAS7     | 17  | 9776265(-)        | Inversion          |             | MMRC0392 | Treated            |
| NTN1     | 17  | 8962987(+)        | MAP2K4   | 17  | 11890893(-)       | Long range         |             | MMRC0392 | Treated            |
| NTN1     | 17  | 9053236(+)        | MAP2K4   | 17  | 11958316(-)       | Long range         |             | MMRC0392 | Treated            |
| NTN1     | 17  | 8849351(-)        |          | 17  | 8899501(+)        | Tandem duplication |             | MMRC0392 | Treated            |
| NTN1     | 17  | 8889896(-)        |          | 21  | 42308631(+)       | Translocation      |             | MMRC0392 | Treated            |
| NTN1     | 17  | 8930086(+)        |          | 21  | 42444746(+)       | Translocation      |             | MMRC0392 | Treated            |
| NTN1     | 17  | 9003033(+)        | BACE2    | 21  | 41530729(+)       | Translocation      |             | MMRC0392 | Treated            |
| NTN1     | 17  | 8929539(-)        | DSCAM    | 21  | 40864782(-)       | Translocation      |             | MMRC0392 | Treated            |
| NTN1     | 17  | 8931346(+)        | FAM3B    | 21  | 41629575(-)       | Translocation      |             | MMRC0392 | Treated            |
| NUCB2    | 3   | 124191567(-)      |          | 11  | 17306312(+)       | Translocation      |             | MMRC0191 | Treated            |
| NUMA1    | 11  | 71407199          |          |     |                   | Missense           | I251L       | MMRC0309 | Untreated          |
| NUMB     | 14  | 72813619          |          |     |                   | Missense           | S448L       | MMRC0389 | Treated            |
| NUP155   | 5   | 37353901          |          |     |                   | Missense           | P751S       | MMRC0191 | Treated            |
| NUP155   | 5   | 37387135          |          |     |                   | Missense           | T213P       | MMRC0309 | Untreated          |
| NUP160   | 11  | 47448402(+)       |          | 11  | 47793673(-)       | Deletion           |             | MMRC0408 | Untreated          |
| NUP210   | 3   | 13402852          |          |     |                   | Missense           | P247L       | MMRC0344 | Treated            |
| NUP210L  | 1   | 152328606         |          |     |                   | Missense           | H759P       | MMRC0332 | Treated            |
| NUP214   | 9   | 133004531         |          |     |                   | Missense           | E350K       | MMRC0286 | Untreated          |
| NUP93    | 16  | 55425591          |          |     |                   | Missense           | R530W       | MMRC0376 | Untreated          |
| OBFC2A   | 2   | 192257253         |          |     |                   | Missense           | T144K       | MMRC0376 | Untreated          |
| OBSCN    | 1   | 226498862         |          |     |                   | Missense           | G1150C      | MMRC0338 | Untreated          |
| OCM      | 7   | 5887105           |          |     |                   | Missense           | R20Q        | MMRC0389 | Treated            |

Supplementary Table 3 (continued)

| Gene    | Chr | Position (strand) | 2nd gene | Chr | Position (strand) | Type               | AA change | Sample   | Previously treated |
|---------|-----|-------------------|----------|-----|-------------------|--------------------|-----------|----------|--------------------|
| ODF1    | 8   | 103642209         |          |     |                   | Missense           | N225S     | MMRC0284 | Untreated          |
| ODZ1    | X   | 123633315         |          |     |                   | Missense           | L356Q     | MMRC0387 | Untreated          |
| ODZ2    | 5   | 167421693         |          |     |                   | Missense           | G454C     | MMRC0383 | Treated            |
| ODZ4    | 11  | 78161592(+)       |          | 11  | 78567574(-)       | Deletion           |           | MMRC0319 | Untreated          |
| OLFM3   | 1   | 102042783         |          |     |                   | Missense           | D326Y     | MMRC0389 | Treated            |
| OPRL1   | 20  | 62194608          |          |     |                   | Missense           | L31V      | MMRC0381 | Untreated          |
| OR12D2  | 6   | 29472995          |          |     |                   | Missense           | K180N     | MMRC0329 | Treated            |
| OR1G1   | 17  | 2977247           |          |     |                   | Missense           | V117F     | MMRC0356 | Untreated          |
| OR1L6   | 9   | 124552015         |          |     |                   | Missense           | Q23R      | MMRC0344 | Treated            |
| OR2A14  | 7   | 143458045         |          |     |                   | Missense           | A303T     | MMRC0421 | Treated            |
| OR2G2   | 1   | 245818830         |          |     |                   | Nonsense           | C182*     | MMRC0356 | Untreated          |
| OR2K2   | 9   | 113129840         |          |     |                   | Missense           | G232V     | MMRC0387 | Untreated          |
| OR2L8   | 1   | 246179310         |          |     |                   | Missense           | F176L     | MMRC0191 | Treated            |
| OR4D5   | 11  | 123315982         |          |     |                   | Missense           | V150G     | MMRC0425 | Untreated          |
| OR4E2   | 14  | 21203812          |          |     |                   | Nonsense           | R226*     | MMRC0392 | Treated            |
| OR4K14  | 14  | 19552945          |          |     |                   | Missense           | I83T      | MMRC0376 | Untreated          |
| OR5AP2  | 11  | 56165605          |          |     |                   | Missense           | Y296C     | MMRC0282 | Treated            |
| OR5D16  | 11  | 55363092          |          |     |                   | Missense           | S97P      | MMRC0309 | Untreated          |
| OR5H14  | 3   | 99351494          |          |     |                   | Missense           | S192F     | MMRC0309 | Untreated          |
| OR5P3   | 11  | 7803897           |          |     |                   | Missense           | A67S      | MMRC0412 | Treated            |
| OR8D1   | 11  | 123684960         |          |     |                   | Missense           | L305V     | MMRC0381 | Untreated          |
| OR8J3   | 11  | 55661718          |          |     |                   | Missense           | S18C      | MMRC0344 | Treated            |
| OR8K3   | 11  | 55843058          |          |     |                   | Missense           | Q234E     | MMRC0282 | Treated            |
| ORAOV1  | 11  | 69191913          |          |     |                   | Missense           | F92L      | MMRC0244 | Untreated          |
| OSBP    | 11  | 59100733          |          |     |                   | Missense           | E773Q     | MMRC0389 | Treated            |
| OSBP2   | 22  | 29613453          |          |     |                   | Missense           | R383Q     | MMRC0242 | Treated            |
| OSBPL6  | 2   | 178934702         |          |     |                   | Missense           | E401Q     | MMRC0309 | Untreated          |
| OSBPL8  | 12  | 75308492          |          |     |                   | Missense           | D294N     | MMRC0389 | Treated            |
| OSR2    | 8   | 100030520         |          |     |                   | Missense           | T55M      | MMRC0191 | Treated            |
| OVCH1   | 12  | 29489537          |          |     |                   | Missense           | T941I     | MMRC0335 | Treated            |
| PAK4    | 19  | 44356290          |          |     |                   | Missense           | S300T     | MMRC0329 | Treated            |
| PANK3   | 5   | 167921011         |          |     |                   | Missense           | I301F     | MMRC0242 | Treated            |
| PAPPA2  | 1   | 174887833(+)      |          | 6   | 38796456(+)       | Translocation      |           | MMRC0309 | Untreated          |
| PARK2   | 2   | 34866613(-)       |          | 6   | 161858558(-)      | Translocation      |           | MMRC0376 | Untreated          |
| PARN    | 16  | 11675607(-)       |          | 16  | 14557118(+)       | Long range         |           | MMRC0344 | Treated            |
| PARN    | 16  | 14557020          |          |     |                   | Missense           | G437V     | MMRC0344 | Treated            |
| PARVG   | 22  | 42923414          |          |     |                   | Missense           | N210K     | MMRC0383 | Treated            |
| PBK     | 8   | 27724445          |          |     |                   | Missense           | M241L     | MMRC0335 | Treated            |
| PBRM1   | 3   | 52662877(+)       | KRT15    | 17  | 36924674(+)       | Translocation      |           | MMRC0335 | Treated            |
| PBX2    | 6   | 32263038          |          |     |                   | Missense           | G328A     | MMRC0284 | Untreated          |
| PCCA    | 13  | 99946892(+)       | NALCN    | 13  | 100666583(-)      | Deletion           |           | MMRC0392 | Treated            |
| PCDH10  | 4   | 134303621         |          |     |                   | Missense           | A946V     | MMRC0343 | Treated            |
| PCDH10  | 4   | 134293320         |          |     |                   | Missense           | G859C     | MMRC0381 | Untreated          |
| PCDH15  | 10  | 55452774          |          |     |                   | Missense           | T809A     | MMRC0376 | Untreated          |
| PCDH17  | 13  | 57105459          |          |     |                   | Missense           | T260A     | MMRC0412 | Treated            |
| PCDH18  | 4   | 138670955         |          |     |                   | Missense           | A580T     | MMRC0344 | Treated            |
| PCDH18  | 4   | 138672160         |          |     |                   | Missense           | A178V     | MMRC0173 | Treated            |
| PCDH20  | 13  | 60884812          |          |     |                   | Missense           | P474R     | MMRC0335 | Treated            |
| PCDH7   | 2   | 172845896(-)      |          | 4   | 30588059(-)       | Translocation      |           | MMRC0191 | Treated            |
| PCDHA11 | 5   | 140230230         |          |     |                   | Missense           | A453V     | MMRC0381 | Untreated          |
| PCDHA12 | 5   | 140235327         |          |     |                   | Missense           | G29V      | MMRC0216 | Untreated          |
| PCDHB1  | 5   | 140412416         |          |     |                   | Missense           | V393L     | MMRC0412 | Treated            |
| PCDHB10 | 5   | 140552936         |          |     |                   | Missense           | S209R     | MMRC0390 | Treated            |
| PCDHB13 | 5   | 140576140         |          |     |                   | Missense           | C754Y     | MMRC0329 | Treated            |
| PCDHGA7 | 5   | 140743885         |          |     |                   | Missense           | R412Q     | MMRC0191 | Treated            |
| PCYT1B  | X   | 24503217          |          |     |                   | Missense           | R265K     | MMRC0191 | Treated            |
| PDE11A  | 2   | 178644936         |          |     |                   | Missense           | R159W     | MMRC0242 | Treated            |
| PDE11A  | 2   | 178253862         |          |     |                   | Missense           | F537L     | MMRC0329 | Treated            |
| PDE3A   | 12  | 20681341          |          |     |                   | Missense           | N681I     | MMRC0347 | Untreated          |
| PDE4D   | 4   | 96913100(-)       |          | 5   | 59410132(+)       | Translocation      |           | MMRC0309 | Untreated          |
| PDE8B   | 5   | 76682659          |          |     |                   | Missense           | V344G     | MMRC0004 | Untreated          |
| PDGFRL  | 8   | 17530561          |          |     |                   | Missense           | Y264F     | MMRC0338 | Untreated          |
| PDIA6   | 2   | 10854709          |          |     |                   | Missense           | P99S      | MMRC0338 | Untreated          |
| PDZD8   | 10  | 119124316         |          |     |                   | Missense           | R138H     | MMRC0329 | Treated            |
| PFAS    | 17  | 8105431(-)        | MAP2K4   | 17  | 11947091(-)       | Long range         |           | MMRC0392 | Treated            |
| PFAS    | 17  | 7936725(-)        |          | 17  | 8110682(+)        | Tandem duplication |           | MMRC0392 | Treated            |
| PFAS    | 17  | 8110065(-)        | MYH10    | 17  | 8376370(+)        | Tandem duplication |           | MMRC0392 | Treated            |
| PFAS    | 17  | 8112256(-)        |          | 21  | 39868238(+)       | Translocation      |           | MMRC0392 | Treated            |
| PFAS    | 17  | 8105593(+)        | DSCAM    | 21  | 40855116(-)       | Translocation      |           | MMRC0392 | Treated            |

Supplementary Table 3 (continued)

| Gene     | Chr | Position (strand) | 2nd gene | Chr | Position (strand) | Type                 | AA change    | Sample   | Previously treated |
|----------|-----|-------------------|----------|-----|-------------------|----------------------|--------------|----------|--------------------|
| PFAS     | 17  | 8111022(-)        | SH3BGR   | 21  | 39805530(-)       | Translocation        |              | MMRC0392 | Treated            |
| PFTK1    | 7   | 90338499(+)       |          | 7   | 90399548(-)       | Deletion             |              | MMRC0356 | Untreated          |
| PFTK2    | 2   | 202375229(+)      |          | 2   | 202389723(-)      | Deletion             |              | MMRC0343 | Treated            |
| PGM2L1   | 11  | 73762831(-)       |          | 11  | 73765908(+)       | Tandem duplication   |              | MMRC0319 | Untreated          |
| PHACTR2  | 6   | 144169914         |          |     |                   | Missense             | F545I        | MMRC0329 | Treated            |
| PHC1     | 12  | 8974433           |          |     |                   | Missense             | V250L        | MMRC0309 | Untreated          |
| PHTF1    | 1   | 114085790(+)      | PTP4A3   | 8   | 142501723(+)      | Translocation        |              | MMRC0421 | Treated            |
| PICK1    | 22  | 36789806(-)       |          | 22  | 38770891(+)       | Long range           |              | MMRC0375 | Treated            |
| PIGK     | 1   | 77399662          |          |     |                   | Missense             | A240V        | MMRC0356 | Untreated          |
| PIGL     | 17  | 8067247(+)        |          | 17  | 16149713(-)       | Long range           |              | MMRC0392 | Treated            |
| PIGL     | 17  | 8193111(-)        |          | 17  | 16138288(+)       | Long range           |              | MMRC0392 | Treated            |
| PIGL     | 17  | 8208481(-)        |          | 17  | 16070121(+)       | Long range           |              | MMRC0392 | Treated            |
| PIGL     | 17  | 16070378(+)       | DSCAM    | 21  | 40918883(+)       | Translocation        |              | MMRC0392 | Treated            |
| PIGL     | 17  | 16107242(+)       | SLC37A1  | 21  | 42834123(+)       | Translocation        |              | MMRC0392 | Treated            |
| PIGL     | 17  | 16109115(-)       | SLC37A1  | 21  | 42834251(-)       | Translocation        |              | MMRC0392 | Treated            |
| PIGZ     | 3   | 198158711         |          |     |                   | Missense             | V485G        | MMRC0216 | Untreated          |
| PIWIL1   | 12  | 129408041         |          |     |                   | Missense             | D552V        | MMRC0390 | Treated            |
| PKD1L1   | 7   | 47496004(-)       |          | 7   | 47846579(+)       | Tandem duplication   |              | MMRC0356 | Untreated          |
| PKHD1    | 6   | 1322688(-)        |          | 6   | 51697366(+)       | Long range           |              | MMRC0389 | Treated            |
| PKHD1    | 6   | 51693456(+)       |          | 6   | 76546987(+)       | Long range           |              | MMRC0389 | Treated            |
| PKHD1    | 6   | 51592193          |          |     |                   | Missense             | R3957H       | MMRC0309 | Untreated          |
| PKHD1    | 6   | 52018871          |          |     |                   | Missense             | Y828N        | MMRC0347 | Untreated          |
| PKHD1L1  | 8   | 110546210         |          |     |                   | Missense             | K2658R       | MMRC0343 | Treated            |
| PKHD1L1  | 8   | 110536259         |          |     |                   | Splice site          | G2292_splice | MMRC0338 | Untreated          |
| PKP1     | 1   | 199556104         |          |     |                   | Missense             | C461S        | MMRC0319 | Untreated          |
| PLA2G2D  | 1   | 20315541          |          |     |                   | Missense             | Q19H         | MMRC0412 | Treated            |
| PLA2G2D  | 1   | 20314693          |          |     |                   | Nonsense             | W62*         | MMRC0242 | Treated            |
| PLA2G2E  | 1   | 20121737          |          |     |                   | Missense             | G47S         | MMRC0244 | Untreated          |
| PLA2G6   | 22  | 36842102          |          |     |                   | Missense             | Y602C        | MMRC0329 | Treated            |
| PLA2R1   | 2   | 160542111         |          |     |                   | Nonsense             | Y777*        | MMRC0242 | Treated            |
| PLCB4    | 20  | 9336667           |          |     |                   | Missense             | A572D        | MMRC0308 | Treated            |
| PLD2     | 17  | 4668580           |          |     |                   | Nonsense             | S648*        | MMRC0389 | Treated            |
| PLEKHA2  | 8   | 38946121          |          |     |                   | Missense             | S314C        | MMRC0389 | Treated            |
| PLEKHA7  | 8   | 52121898(+)       |          | 11  | 16790987(-)       | Translocation        |              | MMRC0191 | Treated            |
| PLEKHG2  | 19  | 44604700          |          |     |                   | Missense             | P537A        | MMRC0356 | Untreated          |
| PLK1S1   | 20  | 21154716(+)       |          | 20  | 21201650(-)       | Deletion             |              | MMRC0421 | Treated            |
| PLK4     | 4   | 129031759         |          |     |                   | Missense             | E631D        | MMRC0329 | Treated            |
| PLLP     | 15  | 50379143(-)       |          | 16  | 55866315(+)       | Translocation        |              | MMRC0383 | Treated            |
| PMP22    | 17  | 8857645(-)        |          | 17  | 15084210(-)       | Long range           |              | MMRC0392 | Treated            |
| PMP22    | 17  | 15075518(+)       | DSCAM    | 21  | 40854640(+)       | Translocation        |              | MMRC0392 | Treated            |
| PNLIP    | 10  | 118308665         |          |     |                   | Missense             | F314L        | MMRC0387 | Untreated          |
| PNPLA3   | 22  | 42673444          |          |     |                   | Missense             | S432Y        | MMRC0286 | Untreated          |
| PNRC1    | 6   | 89847473          |          |     |                   | Frame shift deletion | D47fs        | MMRC0286 | Untreated          |
| PNRC1    | 6   | 89847360          |          |     |                   | Missense             | E10K         | MMRC0286 | Untreated          |
| PODN     | 1   | 53320264          |          |     |                   | Missense             | S610F        | MMRC0421 | Treated            |
| POLE     | 12  | 131730180         |          |     |                   | Missense             | V1444L       | MMRC0309 | Untreated          |
| POLH     | 6   | 43689516          |          |     |                   | Missense             | K462N        | MMRC0359 | Untreated          |
| POLQ     | 3   | 122684928         |          |     |                   | Missense             | P1989S       | MMRC0389 | Treated            |
| POLR1C   | 6   | 43595460          |          |     |                   | Missense             | N96K         | MMRC0383 | Treated            |
| POLR3A   | 10  | 79455508          |          |     |                   | Missense             | D66H         | MMRC0376 | Untreated          |
| POLR3C   | 1   | 144305508         |          |     |                   | Missense             | I471V        | MMRC0356 | Untreated          |
| POLR3G   | 5   | 89838223          |          |     |                   | Missense             | E187D        | MMRC0392 | Treated            |
| PON3     | 7   | 94854641(+)       |          | 12  | 37672207(-)       | Translocation        |              | MMRC0242 | Treated            |
| POT1     | 7   | 124286335         |          |     |                   | Missense             | G205D        | MMRC0242 | Treated            |
| PPAP2A   | 5   | 54779768(+)       | NDUFAF2  | 5   | 60346427(+)       | Long range           |              | MMRC0344 | Treated            |
| PPFIA1   | 11  | 69878106          |          |     |                   | Missense             | E739K        | MMRC0389 | Treated            |
| PPFIA4   | 1   | 201291220         |          |     |                   | Missense             | A117T        | MMRC0191 | Treated            |
| PPFIBP1  | 12  | 27732507          |          |     |                   | Missense             | A794T        | MMRC0242 | Treated            |
| PPP1R12B | 1   | 200661436         |          |     |                   | Missense             | L221F        | MMRC0421 | Treated            |
| PPRC1    | 10  | 103897851(+)      | NEURL    | 10  | 105267915(-)      | Long range           |              | MMRC0390 | Treated            |
| PPRC1    | 10  | 103897926(-)      | ZDHHC1   | 16  | 65992199(+)       | Translocation        |              | MMRC0390 | Treated            |
| PPTC7    | 12  | 109468207         |          |     |                   | Missense             | N155H        | MMRC0284 | Untreated          |
| PRDM1    | 6   | 106661791         |          |     |                   | In frame deletion    | A739_V754del | MMRC0309 | Untreated          |
| PRDM1    | 6   | 106661497         |          |     |                   | Missense             | S641R        | MMRC0282 | Treated            |
| PRG4     | 1   | 184543900         |          |     |                   | Missense             | G809E        | MMRC0383 | Treated            |
| PRICKLE2 | 3   | 64108038          |          |     |                   | Missense             | R390W        | MMRC0387 | Untreated          |
| PRIM2    | 6   | 57537913(-)       |          | 7   | 30116221(-)       | Translocation        |              | MMRC0191 | Treated            |
| PRIMA1   | 14  | 93272541(+)       |          | 14  | 93301882(-)       | Deletion             |              | MMRC0332 | Treated            |
| PRKAG2   | 7   | 151109276         |          |     |                   | Missense             | M121L        | MMRC0389 | Treated            |

Supplementary Table 3 (continued)



| Gene     | Chr | Position (strand) | 2nd gene | Chr | Position (strand) | Type                 | AA change   | Sample   | Previously treated |
|----------|-----|-------------------|----------|-----|-------------------|----------------------|-------------|----------|--------------------|
| PRKCB    | 12  | 24644411(+)       |          | 16  | 23905687(-)       | Translocation        |             | MMRC0344 | Treated            |
| PRKCB    | 12  | 24646241(-)       |          | 16  | 23880041(-)       | Translocation        |             | MMRC0344 | Treated            |
| PRK CZ   | 1   | 2056602           |          |     |                   | Missense             | Y126D       | MMRC0322 | Untreated          |
| PRKD2    | 19  | 51885761          |          |     |                   | Missense             | I425T       | MMRC0376 | Untreated          |
| PRKD3    | 2   | 37350314          |          |     |                   | Missense             | Q575H       | MMRC0338 | Untreated          |
| PRKDC    | 8   | 48869437          |          |     |                   | Missense             | S3546F      | MMRC0389 | Treated            |
| PRKG1    | 10  | 52873989(+)       |          | 10  | 52904191(-)       | Deletion             |             | MMRC0191 | Treated            |
| PRPF38B  | 1   | 109042827         |          |     |                   | Missense             | W213R       | MMRC0308 | Treated            |
| PRPF8    | 17  | 1503632           |          |     |                   | Missense             | K2108M      | MMRC0389 | Treated            |
| PRR21    | 2   | 240630178         |          |     |                   | Missense             | P299S       | MMRC0308 | Treated            |
| PRR4     | 12  | 11022945(+)       | ETV6     | 12  | 11854448(-)       | Deletion             |             | MMRC0332 | Treated            |
| PRSS16   | 6   | 27331050          |          |     |                   | Missense             | S508G       | MMRC0329 | Treated            |
| PRSS16   | 6   | 27331057          |          |     |                   | Missense             | I510T       | MMRC0329 | Treated            |
| PRSS22   | 16  | 2843909           |          |     |                   | Missense             | M225I       | MMRC0343 | Treated            |
| PRSS45   | 3   | 46761162          |          |     |                   | Missense             | V30L        | MMRC0376 | Untreated          |
| PRUNE2   | 9   | 78457362          |          |     |                   | Missense             | A2805V      | MMRC0173 | Treated            |
| PSEN1    | 14  | 72739859(+)       | TDRD9    | 14  | 103564330(-)      | Long range           |             | MMRC0335 | Treated            |
| PSMC6    | 14  | 52254707          |          |     |                   | Missense             | S215N       | MMRC0308 | Treated            |
| PSMD1    | 2   | 231738241         |          |     |                   | Missense             | E855D       | MMRC0375 | Treated            |
| PTDSS1   | 8   | 97376525          |          |     |                   | Frame shift deletion | V155fs      | MMRC0332 | Treated            |
| PTK2     | 8   | 126684555(-)      |          | 8   | 141913260(+)      | Long range           |             | MMRC0343 | Treated            |
| PTK2     | 8   | 127893075(+)      |          | 8   | 141913284(-)      | Long range           |             | MMRC0343 | Treated            |
| PTPLA    | 10  | 17676236          |          |     |                   | Missense             | L253R       | MMRC0242 | Treated            |
| PTPN11   | 12  | 111411271         |          |     |                   | Missense             | G503V       | MMRC0387 | Untreated          |
| PTPRD    | 9   | 8661723(+)        |          | 9   | 9161382(-)        | Deletion             |             | MMRC0332 | Treated            |
| PTPRG    | 3   | 62253880          |          |     |                   | Missense             | Q1399R      | MMRC0375 | Treated            |
| PUS7     | 7   | 104910053         |          |     |                   | Missense             | Q331K       | MMRC0412 | Treated            |
| PUS7L    | 12  | 42434859          |          |     |                   | Missense             | E153Q       | MMRC0347 | Untreated          |
| QRICH2   | 17  | 71800016          |          |     |                   | Missense             | I630T       | MMRC0375 | Treated            |
| RAB25    | 1   | 154304773         |          |     |                   | Missense             | L110F       | MMRC0347 | Untreated          |
| RAB27B   | 18  | 50695888          |          |     |                   | Missense             | F25C        | MMRC0329 | Treated            |
| RAB28    | 4   | 12992253          |          |     |                   | Missense             | G152V       | MMRC0329 | Treated            |
| RAB2A    | 1   | 100586426(-)      |          | 8   | 61652655(-)       | Translocation        |             | MMRC0383 | Treated            |
| RAB3GAP1 | 2   | 135636644         |          |     |                   | Missense             | L780Q       | MMRC0322 | Untreated          |
| RAB5B    | 12  | 54667069          |          |     |                   | Missense             | Q20E        | MMRC0329 | Treated            |
| RABL3    | 3   | 121907629         |          |     |                   | Missense             | L97F        | MMRC0383 | Treated            |
| RAD54L2  | 3   | 51628225(-)       |          | 3   | 66857717(+)       | Long range           |             | MMRC0344 | Treated            |
| RAG1     | 11  | 36554291          |          |     |                   | Missense             | G954D       | MMRC0347 | Untreated          |
| RAG2     | 11  | 36572180          |          |     |                   | Nonsense             | R39*        | MMRC0376 | Untreated          |
| RALGAPA1 | 14  | 35194796          |          |     |                   | Missense             | E1316K      | MMRC0286 | Untreated          |
| RALGAPA2 | 20  | 20433355(-)       |          | 21  | 9840160(-)        | Translocation        |             | MMRC0191 | Treated            |
| RALGAPB  | 20  | 36635398(+)       |          | 20  | 37118142(-)       | Deletion             |             | MMRC0392 | Treated            |
| RALGPS1  | 9   | 128997310         |          |     |                   | Missense             | G344S       | MMRC0383 | Treated            |
| RALYL    | 8   | 83529322(+)       |          | 8   | 85616029(+)       | Long range           |             | MMRC0421 | Treated            |
| RALYL    | 8   | 83664628(-)       |          | 8   | 85606481(-)       | Long range           |             | MMRC0421 | Treated            |
| RANBP17  | 5   | 170600740         |          |     |                   | Missense             | S876G       | MMRC0216 | Untreated          |
| RANBP3L  | 5   | 36307144          |          |     |                   | Missense             | F40I        | MMRC0309 | Untreated          |
| RANBP9   | 6   | 13749808(+)       |          | 6   | 13781392(-)       | Deletion             |             | MMRC0191 | Treated            |
| RAP1GAP2 | 17  | 2691527(-)        |          | 20  | 31926923(+)       | Translocation        |             | MMRC0387 | Untreated          |
| RAP1GAP2 | 17  | 2711029(+)        |          | 20  | 31915944(-)       | Translocation        |             | MMRC0387 | Untreated          |
| RASAL2   | 1   | 176483017(+)      |          | 6   | 85586756(-)       | Translocation        |             | MMRC0191 | Treated            |
| RASAL2   | 1   | 176460940(-)      | FAM19A5  | 22  | 47448413(-)       | Translocation        |             | MMRC0309 | Untreated          |
| RASGRF1  | 15  | 77110902          |          |     |                   | Missense             | P386H       | MMRC0338 | Untreated          |
| RB1      | 13  | 47937490          |          |     |                   | Missense             | M825K       | MMRC0329 | Treated            |
| RBKS     | 2   | 27925174(-)       |          | 8   | 95015910(-)       | Translocation        |             | MMRC0343 | Treated            |
| RBM25    | 14  | 72647499          |          |     |                   | Missense             | T634S       | MMRC0383 | Treated            |
| RBM33    | 7   | 155186794(+)      |          | 7   | 155286244(-)      | Deletion             |             | MMRC0356 | Untreated          |
| RBM33    | 7   | 155186274         |          |     |                   | Missense             | S205L       | MMRC0356 | Untreated          |
| RBM39    | 20  | 33760560          |          |     |                   | Missense             | A409T       | MMRC0322 | Untreated          |
| RBM5     | 3   | 50126409          |          |     |                   | Missense             | W547L       | MMRC0173 | Treated            |
| RBM9     | 22  | 34315726(+)       |          | 22  | 34572420(-)       | Deletion             |             | MMRC0392 | Treated            |
| RBM9     | 22  | 28567428(-)       |          | 22  | 34692913(-)       | Long range           |             | MMRC0392 | Treated            |
| RBMS3    | 3   | 29960341(+)       | ZC3H7B   | 22  | 40052405(-)       | Translocation        |             | MMRC0343 | Treated            |
| RBP4     | 10  | 95343722          |          |     |                   | Missense             | R139H       | MMRC0375 | Treated            |
| RC3H1    | 1   | 172187745         |          |     |                   | Splice site          | M841_splice | MMRC0387 | Untreated          |
| RCOR1    | 14  | 102220649(+)      | TRAF3    | 14  | 102424705(-)      | Deletion             |             | MMRC0319 | Untreated          |
| RD3      | 1   | 209721280         |          |     |                   | Missense             | T34M        | MMRC0308 | Treated            |
| RDH16    | 12  | 55635173          |          |     |                   | Missense             | T119M       | MMRC0284 | Untreated          |
| RELN     | 7   | 103177146         |          |     |                   | Missense             | D207N       | MMRC0421 | Treated            |

Supplementary Table 3 (continued)

| Gene     | Chr | Position (strand) | 2nd gene | Chr | Position (strand) | Type          | AA change    | Sample   | Previously treated |
|----------|-----|-------------------|----------|-----|-------------------|---------------|--------------|----------|--------------------|
| REPS1    | 6   | 139311624(+)      |          | 18  | 50712621(+)       | Translocation |              | MMRC0335 | Treated            |
| RERE     | 1   | 8494310(-)        |          | 8   | 57670917(+)       | Translocation |              | MMRC0191 | Treated            |
| RETSAT   | 2   | 85424368          |          |     |                   | Missense      | A533V        | MMRC0191 | Treated            |
| RFX1     | 19  | 13940433          |          |     |                   | Missense      | P559L        | MMRC0381 | Untreated          |
| RGL1     | 1   | 182162007         |          |     |                   | Missense      | K790N        | MMRC0319 | Untreated          |
| RGNEF    | 5   | 73081472          |          |     |                   | Missense      | A30P         | MMRC0242 | Treated            |
| RIMS2    | 8   | 104967063         |          |     |                   | Missense      | R354W        | MMRC0332 | Treated            |
| RIMS2    | 8   | 105056901         |          |     |                   | Missense      | P973L        | MMRC0389 | Treated            |
| RIPK4    | 21  | 42034912          |          |     |                   | Missense      | Q504K        | MMRC0347 | Untreated          |
| RMI1     | 9   | 85807333          |          |     |                   | Missense      | T538S        | MMRC0343 | Treated            |
| RNASEN   | 5   | 31485209          |          |     |                   | Missense      | N919K        | MMRC0412 | Treated            |
| RNF168   | 3   | 197714230         |          |     |                   | Missense      | L71H         | MMRC0343 | Treated            |
| RNF19A   | 8   | 101340094         |          |     |                   | Missense      | I795V        | MMRC0387 | Untreated          |
| RNF213   | 17  | 75931631          |          |     |                   | Missense      | E2081K       | MMRC0389 | Treated            |
| RNF26    | 11  | 118712253         |          |     |                   | Missense      | C404F        | MMRC0309 | Untreated          |
| ROBO2    | 3   | 77709336          |          |     |                   | Missense      | S737G        | MMRC0216 | Untreated          |
| ROBO2    | 3   | 77696952          |          |     |                   | Missense      | R614C        | MMRC0319 | Untreated          |
| ROPN1    | 3   | 125178495         |          |     |                   | Missense      | G47E         | MMRC0322 | Untreated          |
| RORB     | 9   | 76470227          |          |     |                   | Missense      | C299F        | MMRC0347 | Untreated          |
| RPA4     | X   | 96026003          |          |     |                   | Missense      | S13Y         | MMRC0356 | Untreated          |
| RPGR     | X   | 38030561          |          |     |                   | Missense      | E879K        | MMRC0338 | Untreated          |
| RPL10    | X   | 153281344         |          |     |                   | Missense      | E66G         | MMRC0282 | Treated            |
| RPS6KA1  | 1   | 26754634          |          |     |                   | Nonsense      | Q283*        | MMRC0335 | Treated            |
| RRM1     | 11  | 4113032           |          |     |                   | Missense      | N716H        | MMRC0425 | Untreated          |
| RRN3     | 16  | 15077660(+)       |          | 16  | 26381218(-)       | Long range    |              | MMRC0344 | Treated            |
| RTCD1    | 1   | 100506393         |          |     |                   | Missense      | E82K         | MMRC0286 | Untreated          |
| RTN1     | 14  | 59282905          |          |     |                   | Missense      | S97T         | MMRC0375 | Treated            |
| RUFY2    | 3   | 12692826(-)       |          | 10  | 69806115(+)       | Translocation |              | MMRC0356 | Untreated          |
| RUNDC3B  | 7   | 87190924(+)       | RB1      | 13  | 47872217(-)       | Translocation |              | MMRC0421 | Treated            |
| RUNDC3B  | 7   | 87190950(-)       | RB1      | 13  | 47872099(+)       | Translocation |              | MMRC0421 | Treated            |
| RWDD2A   | 6   | 83962573          |          |     |                   | Missense      | E248Q        | MMRC0389 | Treated            |
| RXFP1    | 4   | 159787750         |          |     |                   | Nonsense      | S568*        | MMRC0343 | Treated            |
| RXFP2    | 13  | 31254863          |          |     |                   | Nonsense      | S303*        | MMRC0347 | Untreated          |
| RYR1     | 19  | 43688832          |          |     |                   | Missense      | A2864V       | MMRC0322 | Untreated          |
| RYR2     | 1   | 235881425         |          |     |                   | Splice site   | K2608_splice | MMRC0389 | Treated            |
| RYR3     | 15  | 31805910          |          |     |                   | Missense      | R2315H       | MMRC0242 | Treated            |
| RYR3     | 15  | 31627672          |          |     |                   | Missense      | W264R        | MMRC0412 | Treated            |
| S100PBP  | 1   | 33094122          |          |     |                   | Missense      | R375C        | MMRC0381 | Untreated          |
| SACM1L   | 3   | 45760070          |          |     |                   | Missense      | G557R        | MMRC0309 | Untreated          |
| SAMD13   | 1   | 84587998          |          |     |                   | Missense      | H88Y         | MMRC0335 | Treated            |
| SAMHD1   | 20  | 34989013          |          |     |                   | Missense      | E228Q        | MMRC0282 | Treated            |
| SAMHD1   | 20  | 34989043          |          |     |                   | Missense      | D218H        | MMRC0282 | Treated            |
| SART1    | 11  | 65502882          |          |     |                   | Missense      | V769M        | MMRC0347 | Untreated          |
| SCG5     | 15  | 30776098          |          |     |                   | Missense      | E211A        | MMRC0412 | Treated            |
| SCGB1A1  | 11  | 61946352          |          |     |                   | Missense      | E47T         | MMRC0282 | Treated            |
| SCN10A   | 3   | 38805490          |          |     |                   | Missense      | C144F        | MMRC0347 | Untreated          |
| SCN11A   | 3   | 38867004          |          |     |                   | Missense      | D1433E       | MMRC0191 | Treated            |
| SCN2A    | 2   | 165918977         |          |     |                   | Missense      | L983F        | MMRC0389 | Treated            |
| SCYL2    | 12  | 99253596          |          |     |                   | Missense      | N642I        | MMRC0308 | Treated            |
| SDF2     | 17  | 24000392          |          |     |                   | Missense      | E126D        | MMRC0338 | Untreated          |
| SDR16C5  | 8   | 57377504(-)       |          | 10  | 4626076(+)        | Translocation |              | MMRC0343 | Treated            |
| SEC13    | 3   | 10317980(-)       | CD300LD  | 17  | 70089089(-)       | Translocation |              | MMRC0421 | Treated            |
| SEC14L2  | 22  | 29141994          |          |     |                   | Missense      | Q277K        | MMRC0242 | Treated            |
| SEC14L5  | 16  | 4969295(-)        | SDK2     | 17  | 69031684(+)       | Translocation |              | MMRC0421 | Treated            |
| SEC63    | 6   | 108357369         |          |     |                   | Missense      | C56Y         | MMRC0376 | Untreated          |
| SEL1L3   | 4   | 25378497          |          |     |                   | Missense      | S908L        | MMRC0389 | Treated            |
| SEMA3A   | 7   | 83430493          |          |     |                   | Missense      | W608C        | MMRC0216 | Untreated          |
| SEMA3E   | 7   | 82885676          |          |     |                   | Missense      | F172L        | MMRC0242 | Treated            |
| SEMG1    | 20  | 43269993          |          |     |                   | Missense      | H214P        | MMRC0408 | Untreated          |
| SENP1    | 12  | 46726474          |          |     |                   | Missense      | D601H        | MMRC0191 | Treated            |
| SEPT14   | 7   | 55869681          |          |     |                   | Missense      | S217R        | MMRC0343 | Treated            |
| SERPINB3 | 18  | 59475182          |          |     |                   | Missense      | Q211K        | MMRC0329 | Treated            |
| SERPINB6 | 6   | 2900828           |          |     |                   | Missense      | K81E         | MMRC0191 | Treated            |
| SERPINE2 | 2   | 224548839         |          |     |                   | Missense      | N407Y        | MMRC0425 | Untreated          |
| SERPINH1 | 11  | 74955575          |          |     |                   | Missense      | A178V        | MMRC0392 | Treated            |
| SERTAD4  | 1   | 208481863         |          |     |                   | Missense      | V210A        | MMRC0390 | Treated            |
| SETBP1   | 18  | 40785677          |          |     |                   | Missense      | P792A        | MMRC0308 | Treated            |
| SETD2    | 3   | 47138966          |          |     |                   | Nonsense      | Q722*        | MMRC0319 | Untreated          |

Supplementary Table 3 (continued)



| Gene     | Chr | Position (strand) | 2nd gene | Chr | Position (strand) | Type                 | AA change | Sample   | Previously treated |
|----------|-----|-------------------|----------|-----|-------------------|----------------------|-----------|----------|--------------------|
| SETD4    | 21  | 36339866          |          |     |                   | Missense             | V204I     | MMRC0344 | Treated            |
| SETX     | 9   | 134129739         |          |     |                   | Missense             | H2581L    | MMRC0244 | Untreated          |
| SF3A3    | 1   | 38222466          |          |     |                   | Missense             | D144Y     | MMRC0173 | Treated            |
| SFMBT1   | 3   | 52978163          |          |     |                   | Missense             | D8N       | MMRC0381 | Untreated          |
| SFRP4    | 7   | 37922289          |          |     |                   | Missense             | D126N     | MMRC0381 | Untreated          |
| SFRP4    | 7   | 37913675          |          |     |                   | Missense             | K324N     | MMRC0406 | Untreated          |
| SFTPD    | 10  | 81696391          |          |     |                   | Missense             | L2R       | MMRC0322 | Untreated          |
| SFXN4    | 10  | 120902700(+)      | IL1RAPL2 | 23  | 104703794(+)      | Translocation        |           | MMRC0309 | Untreated          |
| SGCZ     | 8   | 15134428(+)       | KIF13B   | 8   | 29107152(-)       | Long range           |           | MMRC0421 | Treated            |
| SGCZ     | 8   | 14517910(+)       |          | 10  | 44054930(+)       | Translocation        |           | MMRC0421 | Treated            |
| SH2D2A   | 1   | 155050293         |          |     |                   | Frame shift deletion | E162fs    | MMRC0308 | Treated            |
| SHANK2   | 11  | 69976211(+)       |          | 11  | 70022000(+)       | Inversion            |           | MMRC0421 | Treated            |
| SHISA6   | 17  | 8032858(+)        |          | 17  | 11114064(+)       | Long range           |           | MMRC0392 | Treated            |
| SHISA6   | 17  | 11118073(-)       |          | 17  | 14865882(-)       | Long range           |           | MMRC0392 | Treated            |
| SHKBP1   | 19  | 45781433          |          |     |                   | Missense             | A379T     | MMRC0322 | Untreated          |
| SHOC2    | 10  | 112757286         |          |     |                   | Missense             | Q390R     | MMRC0406 | Untreated          |
| SHROOM2  | X   | 9874732           |          |     |                   | Missense             | R1536G    | MMRC0347 | Untreated          |
| SI       | 3   | 166233893         |          |     |                   | Missense             | T850I     | MMRC0284 | Untreated          |
| SI       | 3   | 166208477         |          |     |                   | Missense             | M1395L    | MMRC0375 | Treated            |
| SI       | 3   | 166182883         |          |     |                   | Missense             | T1753S    | MMRC0406 | Untreated          |
| SIAH3    | 13  | 45285451(-)       |          | 13  | 61419069(+)       | Long range           |           | MMRC0392 | Treated            |
| SIGLEC1  | 20  | 3622990           |          |     |                   | Missense             | V1045G    | MMRC0028 | Untreated          |
| SIPA1    | 11  | 65173679          |          |     |                   | Missense             | P866Q     | MMRC0389 | Treated            |
| SIPA1L2  | 1   | 230709105(+)      |          | 1   | 230748579(+)      | Tandem duplication   |           | MMRC0344 | Treated            |
| SIX1     | 14  | 60183029          |          |     |                   | Missense             | N194Y     | MMRC0173 | Treated            |
| SKIV2L2  | 5   | 54717998(-)       | CDC25C   | 5   | 137687474(+)      | Long range           |           | MMRC0344 | Treated            |
| SKP2     | 5   | 36219832          |          |     |                   | Missense             | C399G     | MMRC0282 | Treated            |
| SLC10A7  | 4   | 147583367         |          |     |                   | Missense             | L151F     | MMRC0389 | Treated            |
| SLC12A2  | 5   | 127477875         |          |     |                   | Missense             | I317L     | MMRC0425 | Untreated          |
| SLC14A1  | 18  | 41401542(+)       |          | 18  | 41562328(-)       | Deletion             |           | MMRC0319 | Untreated          |
| SLC16A9  | 10  | 61094075          |          |     |                   | Missense             | G118R     | MMRC0383 | Treated            |
| SLC17A4  | 6   | 25878738(-)       |          | 19  | 52519405(-)       | Translocation        |           | MMRC0191 | Treated            |
| SLC1A5   | 19  | 51972473          |          |     |                   | Missense             | C363Y     | MMRC0375 | Treated            |
| SLC1A5   | 19  | 51973890          |          |     |                   | Missense             | A314T     | MMRC0387 | Untreated          |
| SLC1A7   | 1   | 53330870          |          |     |                   | Missense             | I325M     | MMRC0338 | Untreated          |
| SLC23A2  | 20  | 4814509           |          |     |                   | Nonsense             | R177*     | MMRC0412 | Treated            |
| SLC25A13 | 7   | 95613829          |          |     |                   | Missense             | D476G     | MMRC0425 | Untreated          |
| SLC26A4  | 7   | 107102699         |          |     |                   | Missense             | T225K     | MMRC0381 | Untreated          |
| SLC27A5  | 19  | 63701835          |          |     |                   | Missense             | M644I     | MMRC0286 | Untreated          |
| SLC27A5  | 19  | 63702771          |          |     |                   | Missense             | V523L     | MMRC0308 | Treated            |
| SLC2A5   | 1   | 9029487(-)        |          | 11  | 59089279(-)       | Translocation        |           | MMRC0191 | Treated            |
| SLC35C1  | 11  | 45789155          |          |     |                   | Missense             | S263N     | MMRC0359 | Untreated          |
| SLC35F3  | 1   | 232390531(+)      |          | 7   | 44883921(-)       | Translocation        |           | MMRC0383 | Treated            |
| SLC37A1  | 17  | 8859523(+)        |          | 21  | 42834577(+)       | Translocation        |           | MMRC0392 | Treated            |
| SLC38A9  | 5   | 55010931(+)       |          | 5   | 55155068(-)       | Deletion             |           | MMRC0421 | Treated            |
| SLC45A4  | 8   | 136489024(-)      |          | 8   | 142304138(-)      | Long range           |           | MMRC0421 | Treated            |
| SLC4A5   | 2   | 74303586          |          |     |                   | Missense             | P1099L    | MMRC0173 | Treated            |
| SLC5A12  | 11  | 26661948          |          |     |                   | Missense             | G414S     | MMRC0329 | Treated            |
| SLC6A12  | 12  | 176245            |          |     |                   | Missense             | W380C     | MMRC0412 | Untreated          |
| SLC8A3   | 14  | 69703977          |          |     |                   | Missense             | G306R     | MMRC0421 | Treated            |
| SLC9A3R1 | 17  | 70276277          |          |     |                   | Missense             | D322H     | MMRC0286 | Untreated          |
| SLC9A5   | 16  | 65843898(-)       | MAP3K3   | 17  | 59078175(-)       | Translocation        |           | MMRC0425 | Untreated          |
| SLC9A6   | X   | 134932475         |          |     |                   | Missense             | R440K     | MMRC0389 | Treated            |
| SLCO1B3  | 12  | 20905295          |          |     |                   | Missense             | Q146R     | MMRC0427 | Treated            |
| SLCO2A1  | 3   | 134296237(-)      |          | 3   | 135161012(+)      | Tandem duplication   |           | MMRC0383 | Treated            |
| SLITRK2  | X   | 144711747         |          |     |                   | Nonsense             | K38*      | MMRC0322 | Untreated          |
| SLITRK4  | X   | 142546379         |          |     |                   | Frame shift deletion | L71fs     | MMRC0387 | Untreated          |
| SLITRK6  | 13  | 85266568          |          |     |                   | Missense             | P693T     | MMRC0309 | Untreated          |
| SLMAP    | 3   | 57825386          |          |     |                   | Missense             | I346M     | MMRC0308 | Treated            |
| SMAP2    | 1   | 40653559          |          |     |                   | Missense             | N200K     | MMRC0381 | Untreated          |
| SMARCB1  | 22  | 22464037          |          |     |                   | Missense             | I63T      | MMRC0282 | Treated            |
| SMARCC1  | 3   | 47297417(-)       |          | 3   | 47610784(+)       | Tandem duplication   |           | MMRC0344 | Treated            |
| SMC5     | 9   | 72083263          |          |     |                   | Missense             | E194K     | MMRC0286 | Untreated          |
| SMC5     | 9   | 72102771          |          |     |                   | Missense             | N375D     | MMRC0322 | Untreated          |
| SMEK1    | 14  | 91006961          |          |     |                   | Missense             | A532T     | MMRC0383 | Treated            |
| SMOC2    | 6   | 168687183         |          |     |                   | Missense             | E165K     | MMRC0387 | Untreated          |
| SMOX     | 20  | 4111429           |          |     |                   | Missense             | V382I     | MMRC0322 | Untreated          |
| SMPDL3A  | 6   | 123166517         |          |     |                   | Missense             | Y193F     | MMRC0319 | Untreated          |
| SNAP25   | 20  | 10225646          |          |     |                   | Missense             | R119C     | MMRC0338 | Untreated          |

Supplementary Table 3 (continued)

| Gene    | Chr | Position (strand) | 2nd gene | Chr | Position (strand) | Type                 | AA change | Sample   | Previously treated |
|---------|-----|-------------------|----------|-----|-------------------|----------------------|-----------|----------|--------------------|
| SNAP47  | 1   | 226021352         |          |     |                   | Missense             | H398R     | MMRC0216 | Untreated          |
| SNAPC3  | 9   | 15441331          |          |     |                   | Missense             | S249L     | MMRC0389 | Treated            |
| SNTB2   | 8   | 108036097(-)      |          | 16  | 67821681(-)       | Translocation        |           | MMRC0344 | Treated            |
| SNTG2   | 2   | 1253754           |          |     |                   | Missense             | L372M     | MMRC0390 | Treated            |
| SNX15   | 11  | 64559001          |          |     |                   | Missense             | E121D     | MMRC0191 | Treated            |
| SNX19   | 11  | 130278478         |          |     |                   | Missense             | E819K     | MMRC0356 | Untreated          |
| SOBP    | 6   | 108061474         |          |     |                   | Missense             | R245G     | MMRC0329 | Treated            |
| SOCS2   | 12  | 92492809          |          |     |                   | Missense             | D107G     | MMRC0425 | Untreated          |
| SOHLH2  | 13  | 35645870          |          |     |                   | Missense             | S320Y     | MMRC0004 | Untreated          |
| SORCS2  | 4   | 7749870           |          |     |                   | Missense             | I546N     | MMRC0335 | Treated            |
| SP100   | 2   | 230693320(-)      |          | 2   | 231008958(-)      | Inversion            |           | MMRC0242 | Treated            |
| SP140   | 2   | 230842889         |          |     |                   | Missense             | S474T     | MMRC0344 | Treated            |
| SP8     | 7   | 20791710          |          |     |                   | Missense             | S84F      | MMRC0308 | Treated            |
| SPATA17 | 1   | 216085951(-)      | KLHL14   | 18  | 28583975(+)       | Translocation        |           | MMRC0343 | Treated            |
| SPATS2  | 2   | 11711670(+)       |          | 12  | 48193920(-)       | Translocation        |           | MMRC0375 | Treated            |
| SPDYE1  | 7   | 44013468          |          |     |                   | Missense             | R237C     | MMRC0425 | Untreated          |
| SPEF2   | 5   | 35487987(-)       |          | 5   | 35733151(-)       | Inversion            |           | MMRC0335 | Treated            |
| SPEG    | 2   | 220062795         |          |     |                   | Missense             | E2937D    | MMRC0389 | Treated            |
| SPOCK1  | 5   | 136431326         |          |     |                   | Missense             | P189L     | MMRC0244 | Untreated          |
| SPOP    | 17  | 45051467          |          |     |                   | Missense             | S119R     | MMRC0421 | Treated            |
| SPRED1  | 15  | 36430666          |          |     |                   | Missense             | F282I     | MMRC0387 | Untreated          |
| SPTA1   | 1   | 156876080         |          |     |                   | Missense             | M1632I    | MMRC0412 | Treated            |
| SPTBN1  | 2   | 54709582          |          |     |                   | Missense             | P603A     | MMRC0383 | Treated            |
| SRD5A3  | 4   | 55920272          |          |     |                   | Missense             | Y75C      | MMRC0392 | Treated            |
| SRRM1   | 1   | 24850690          |          |     |                   | Missense             | S242N     | MMRC0383 | Treated            |
| SRRM2   | 16  | 2752059           |          |     |                   | Missense             | S510F     | MMRC0356 | Untreated          |
| SSX4    | X   | 48129002          |          |     |                   | Missense             | S42F      | MMRC0282 | Treated            |
| ST13    | 13  | 71857552(+)       |          | 22  | 39578062(+)       | Translocation        |           | MMRC0335 | Treated            |
| ST14    | 11  | 129564854         |          |     |                   | Missense             | V151I     | MMRC0381 | Untreated          |
| ST18    | 8   | 53289361          |          |     |                   | Missense             | E4K       | MMRC0421 | Treated            |
| ST3GAL3 | 1   | 44136263(+)       |          | 23  | 61647996(-)       | Translocation        |           | MMRC0191 | Treated            |
| ST5     | 11  | 8708638           |          |     |                   | Missense             | R259W     | MMRC0322 | Untreated          |
| ST7     | 7   | 116592004(+)      | RASAL3   | 19  | 15434289(+)       | Translocation        |           | MMRC0191 | Treated            |
| STAB2   | 12  | 102588022(+)      | MTM1     | 23  | 149582976(-)      | Translocation        |           | MMRC0191 | Treated            |
| STAC    | 3   | 36501488          |          |     |                   | Missense             | R169C     | MMRC0412 | Treated            |
| STAG1   | 3   | 137673970         |          |     |                   | Missense             | I394V     | MMRC0392 | Treated            |
| STARDB8 | X   | 67859013          |          |     |                   | Missense             | L787M     | MMRC0359 | Untreated          |
| STAT2   | 12  | 55034851          |          |     |                   | Missense             | N204S     | MMRC0244 | Untreated          |
| STK17A  | 7   | 43614462          |          |     |                   | Nonsense             | R168*     | MMRC0406 | Untreated          |
| STK38L  | 12  | 27342037          |          |     |                   | Missense             | H39Q      | MMRC0308 | Treated            |
| STK4    | 20  | 43137104          |          |     |                   | Missense             | K446R     | MMRC0412 | Treated            |
| STRN3   | 14  | 30457961          |          |     |                   | Missense             | T401I     | MMRC0383 | Treated            |
| STX8    | 17  | 9219719(+)        |          | 17  | 14654365(-)       | Long range           |           | MMRC0392 | Treated            |
| SULT2B1 | 19  | 53782366          |          |     |                   | Missense             | V80M      | MMRC0216 | Untreated          |
| SVIL    | 10  | 29810637          |          |     |                   | Missense             | A1661V    | MMRC0375 | Treated            |
| SVIL    | 10  | 29861680          |          |     |                   | Missense             | R541H     | MMRC0389 | Treated            |
| SVIL    | 10  | 29855698(-)       | RNF169   | 11  | 74209206(-)       | Translocation        |           | MMRC0412 | Treated            |
| SYDE2   | 1   | 85416527          |          |     |                   | Missense             | R854Q     | MMRC0406 | Untreated          |
| SYNE2   | 14  | 63695234          |          |     |                   | Missense             | E5311Q    | MMRC0329 | Treated            |
| SYNJ1   | 21  | 32933263          |          |     |                   | Frame shift deletion | F1286fs   | MMRC0309 | Untreated          |
| SYT17   | 4   | 87142950(+)       |          | 16  | 19128527(-)       | Translocation        |           | MMRC0338 | Untreated          |
| SYT3    | 19  | 55821002          |          |     |                   | Missense             | S456T     | MMRC0389 | Treated            |
| SYTL2   | 11  | 85114687          |          |     |                   | Missense             | T154N     | MMRC0338 | Untreated          |
| TAAR8   | 6   | 132916334         |          |     |                   | Nonsense             | W270*     | MMRC0412 | Treated            |
| TAC4    | 17  | 45280282          |          |     |                   | Missense             | E33Q      | MMRC0389 | Treated            |
| TACR3   | 4   | 104860263         |          |     |                   | Missense             | A7S       | MMRC0329 | Treated            |
| TADA2A  | 17  | 32857793          |          |     |                   | Missense             | E33K      | MMRC0286 | Untreated          |
| TAGAP   | 6   | 159377187         |          |     |                   | Missense             | T441K     | MMRC0347 | Untreated          |
| TAPBPL  | 12  | 6414085(-)        |          | 12  | 6433311(+)        | Tandem duplication   |           | MMRC0387 | Untreated          |
| TAS2R38 | 7   | 141319243         |          |     |                   | Missense             | L239Q     | MMRC0412 | Treated            |
| TBC1D1  | 4   | 37800191(-)       |          | 13  | 80893772(-)       | Translocation        |           | MMRC0191 | Treated            |
| TBC1D9  | 4   | 141809523         |          |     |                   | Nonsense             | S529*     | MMRC0389 | Treated            |
| TCERG1L | 10  | 132834859         |          |     |                   | Missense             | H363Q     | MMRC0343 | Treated            |
| TECPR1  | 7   | 97708386          |          |     |                   | Missense             | L255P     | MMRC0173 | Treated            |
| TEPP    | 16  | 56569422          |          |     |                   | Missense             | Q122H     | MMRC0335 | Treated            |
| TET1    | 10  | 70096986          |          |     |                   | Missense             | H1547P    | MMRC0286 | Untreated          |
| TET1    | 10  | 70096858          |          |     |                   | Missense             | Q1504H    | MMRC0383 | Treated            |
| TEX2    | 17  | 59613101(-)       |          | 17  | 59840409(+)       | Tandem duplication   |           | MMRC0425 | Untreated          |
| TFAM    | 10  | 59824131          |          |     |                   | Missense             | L182P     | MMRC0412 | Treated            |

Supplementary Table 3 (continued)

| Gene      | Chr | Position (strand) | 2nd gene | Chr | Position (strand) | Type                  | AA change    | Sample   | Previously treated |
|-----------|-----|-------------------|----------|-----|-------------------|-----------------------|--------------|----------|--------------------|
| TFAP2D    | 6   | 50791110          |          |     |                   | Missense              | A121V        | MMRC0421 | Treated            |
| TFPI      | 2   | 188069997         |          |     |                   | Missense              | D59N         | MMRC0322 | Untreated          |
| TG        | 8   | 133990689(-)      |          | 8   | 134015290(+)      | Tandem duplication    |              | MMRC0387 | Untreated          |
| TGFBR2    | 3   | 30661282          |          |     |                   | Missense              | V70G         | MMRC0408 | Untreated          |
| THRB      | 3   | 24163230          |          |     |                   | Nonsense              | R158*        | MMRC0335 | Treated            |
| THSD7B    | 2   | 138137602         |          |     |                   | Missense              | Q1517H       | MMRC0392 | Treated            |
| TIMP2     | 17  | 74365323          |          |     |                   | Missense              | G114E        | MMRC0286 | Untreated          |
| TINAG     | 6   | 54296777(+)       |          | 19  | 14493841(-)       | Translocation         |              | MMRC0191 | Treated            |
| TJP3      | 19  | 3684871           |          |     |                   | Missense              | P299A        | MMRC0329 | Treated            |
| TLE4      | 9   | 81392014(+)       |          | 9   | 81481975(-)       | Deletion              |              | MMRC0356 | Untreated          |
| TLL1      | 4   | 167144015         |          |     |                   | Nonsense              | R219*        | MMRC0359 | Untreated          |
| TLN2      | 15  | 60729590          |          |     |                   | Missense              | L51P         | MMRC0335 | Treated            |
| TLR4      | 9   | 119515407         |          |     |                   | Missense              | S394C        | MMRC0308 | Treated            |
| TLR8      | X   | 12847393          |          |     |                   | Missense              | G105R        | MMRC0308 | Treated            |
| TMC5      | 16  | 19359529          |          |     |                   | Missense              | P223Q        | MMRC0344 | Treated            |
| TMCC1     | 3   | 130853105         |          |     |                   | Missense              | T510S        | MMRC0347 | Untreated          |
| TMCO6     | 5   | 140003570         |          |     |                   | Missense              | C314R        | MMRC0381 | Untreated          |
| TMED6     | 16  | 67934963          |          |     |                   | Missense              | F191L        | MMRC0412 | Treated            |
| TMEM132B  | 12  | 99791634(-)       |          | 12  | 124412138(+)      | Long range            |              | MMRC0335 | Treated            |
| TMEM150A  | 2   | 85680611          |          |     |                   | Missense              | Q51K         | MMRC0343 | Treated            |
| TMEM19    | 12  | 70366801          |          |     |                   | Missense              | I25S         | MMRC0421 | Treated            |
| TMEM195   | 7   | 15437260          |          |     |                   | Splice site           | E137_splice  | MMRC0390 | Treated            |
| TMEM38A   | 3   | 195841914(+)      |          | 19  | 16641397(-)       | Translocation         |              | MMRC0343 | Treated            |
| TMEM63B   | 6   | 44229895          |          |     |                   | Missense              | N740D        | MMRC0242 | Treated            |
| TMEM63B   | 6   | 44210804          |          |     |                   | Missense              | A78T         | MMRC0387 | Untreated          |
| TMPRSS11B | 4   | 68776271          |          |     |                   | Nonsense              | R402*        | MMRC0359 | Untreated          |
| TMPRSS13  | 11  | 117294552         |          |     |                   | Missense              | Q78R         | MMRC0423 | Treated            |
| TMX3      | 18  | 64495382          |          |     |                   | Missense              | G378A        | MMRC0282 | Treated            |
| TNC       | 9   | 116888162         |          |     |                   | Missense              | D557H        | MMRC0335 | Treated            |
| TNFRSF1A  | 12  | 6310138           |          |     |                   | Missense              | G209D        | MMRC0427 | Treated            |
| TNKS1BP1  | 11  | 56837122          |          |     |                   | Missense              | G539V        | MMRC0173 | Treated            |
| TNNI3K    | 1   | 74623325(+)       |          | 2   | 122720643(+)      | Translocation         |              | MMRC0309 | Untreated          |
| TNNI3K    | 1   | 74623456(-)       |          | 8   | 35156775(-)       | Translocation         |              | MMRC0309 | Untreated          |
| TNPO1     | 5   | 72182866          |          |     |                   | Missense              | Y49H         | MMRC0375 | Treated            |
| TNPO2     | 19  | 12685276(+)       | EMR3     | 19  | 14613995(-)       | Long range            |              | MMRC0344 | Treated            |
| TNPO2     | 19  | 12686754          |          |     |                   | Splice site           | Y258_splice  | MMRC0191 | Treated            |
| TNRC6B    | 22  | 38991755          |          |     |                   | Missense              | W525C        | MMRC0383 | Treated            |
| TNS4      | 17  | 35906149          |          |     |                   | Missense              | A19P         | MMRC0387 | Untreated          |
| TOPBP1    | 3   | 134847794(+)      |          | 3   | 134851517(+)      | Inversion             |              | MMRC0376 | Untreated          |
| TOPBP1    | 3   | 134847856(-)      |          | 3   | 134851208(-)      | Inversion             |              | MMRC0376 | Untreated          |
| TOPBP1    | 3   | 134858357         |          |     |                   | Missense              | G133A        | MMRC0191 | Treated            |
| TOX3      | 16  | 51041857          |          |     |                   | Missense              | P166T        | MMRC0376 | Untreated          |
| TP53      | 17  | 7517839           |          |     |                   | Missense              | C275S        | MMRC0335 | Treated            |
| TP53      | 17  | 7518961           |          |     |                   | Missense              | Y205D        | MMRC0343 | Treated            |
| TP53      | 17  | 7518988           |          |     |                   | Nonsense              | R196*        | MMRC0347 | Untreated          |
| TP53AIP1  | 11  | 128312908         |          |     |                   | Nonsense              | E6*          | MMRC0308 | Treated            |
| TRABD     | 22  | 38702388(+)       |          | 22  | 48977497(-)       | Long range            |              | MMRC0421 | Treated            |
| TRAF3     | 14  | 102433378         |          |     |                   | Frame shift insertion | E283fs       | MMRC0309 | Untreated          |
| TRAF3     | 14  | 102441819         |          |     |                   | Missense              | D551V        | MMRC0173 | Treated            |
| TRAFD1    | 12  | 111074265         |          |     |                   | Missense              | N519K        | MMRC0322 | Untreated          |
| TRAM1L1   | 4   | 118225955         |          |     |                   | Missense              | S15G         | MMRC0173 | Treated            |
| TRAPPC10  | 21  | 44303484          |          |     |                   | Missense              | A251T        | MMRC0387 | Untreated          |
| TRAPPC10  | 21  | 44332122          |          |     |                   | Nonsense              | L885*        | MMRC0329 | Treated            |
| TRAPPC5   | 19  | 7653611           |          |     |                   | Missense              | A158T        | MMRC0329 | Treated            |
| TRIM10    | 6   | 30236494          |          |     |                   | Missense              | T41P         | MMRC0412 | Treated            |
| TRIM17    | 1   | 226669003         |          |     |                   | Missense              | V132L        | MMRC0338 | Untreated          |
| TRIM29    | 11  | 119503486         |          |     |                   | Missense              | S301N        | MMRC0408 | Untreated          |
| TRIM47    | 17  | 71382742          |          |     |                   | Missense              | G445E        | MMRC0329 | Treated            |
| TRIM6     | 11  | 5588711           |          |     |                   | Missense              | V372I        | MMRC0319 | Untreated          |
| TRIO      | 5   | 14534728          |          |     |                   | Splice site           | D2155_splice | MMRC0344 | Treated            |
| TRPM3     | 9   | 72651243          |          |     |                   | Missense              | L183F        | MMRC0286 | Untreated          |
| TSC1      | 9   | 134770859         |          |     |                   | Missense              | T643A        | MMRC0383 | Treated            |
| TSHR      | 14  | 80679476          |          |     |                   | Missense              | T441P        | MMRC0344 | Treated            |
| TSHZ2     | 20  | 51305306          |          |     |                   | Missense              | F634L        | MMRC0244 | Untreated          |
| TSHZ2     | 20  | 51305674          |          |     |                   | Missense              | L757Q        | MMRC0427 | Treated            |
| TSHZ3     | 19  | 36462367          |          |     |                   | Missense              | S58G         | MMRC0344 | Treated            |
| TSHZ3     | 19  | 36459529          |          |     |                   | Missense              | R1004W       | MMRC0421 | Treated            |
| TSP02     | 6   | 41118876          |          |     |                   | Splice site           | G58_splice   | MMRC0322 | Untreated          |
| TTC21A    | 3   | 39134592          |          |     |                   | Missense              | D249N        | MMRC0381 | Untreated          |
| TTC21B    | 2   | 166493767(+)      |          | 2   | 166524174(-)      | Deletion              |              | MMRC0332 | Treated            |

Supplementary Table 3 (continued)

| Gene    | Chr | Position (strand) | 2nd gene | Chr | Position (strand) | Type          | AA change   | Sample   | Previously treated |
|---------|-----|-------------------|----------|-----|-------------------|---------------|-------------|----------|--------------------|
| TTF1    | 9   | 134267207         |          |     |                   | Missense      | S275T       | MMRC0332 | Treated            |
| TTL6    | 17  | 44202102          |          |     |                   | Missense      | M799I       | MMRC0286 | Untreated          |
| TTN     | 2   | 179178424         |          |     |                   | Missense      | P9075L      | MMRC0356 | Untreated          |
| TTN     | 2   | 179224655         |          |     |                   | Missense      | E10715V     | MMRC0376 | Untreated          |
| TTN     | 2   | 179190751         |          |     |                   | Nonsense      | IE6984>M*   | MMRC0335 | Treated            |
| TUBAL3  | 10  | 5432910           |          |     |                   | Missense      | K48N        | MMRC0421 | Treated            |
| TUFT1   | 1   | 149813382         |          |     |                   | Missense      | R203W       | MMRC0425 | Untreated          |
| TUSC3   | 8   | 15650266          |          |     |                   | Missense      | V317L       | MMRC0381 | Untreated          |
| TUSC3   | 8   | 15666088          |          |     |                   | Nonsense      | L345*       | MMRC0408 | Untreated          |
| TXK     | 4   | 47773181          |          |     |                   | Missense      | M411I       | MMRC0319 | Untreated          |
| TXNDC5  | 6   | 7841537(-)        |          | 20  | 17758553(+)       | Translocation |             | MMRC0406 | Untreated          |
| TXNRD1  | 12  | 103173371(-)      | MPHOSPH9 | 12  | 122265505(+)      | Long range    |             | MMRC0335 | Treated            |
| TYK2    | 19  | 10338202          |          |     |                   | Missense      | E174K       | MMRC0319 | Untreated          |
| UBA2    | 19  | 39651878          |          |     |                   | Missense      | R612K       | MMRC0308 | Treated            |
| UBASH3A | 21  | 42321723(+)       |          | 21  | 42733664(+)       | Inversion     |             | MMRC0392 | Treated            |
| UBASH3A | 21  | 42444576(-)       |          | 21  | 42734587(-)       | Inversion     |             | MMRC0392 | Treated            |
| UBASH3A | 17  | 7969619(-)        |          | 21  | 42733404(-)       | Translocation |             | MMRC0392 | Treated            |
| UBASH3A | 17  | 14645553(+)       |          | 21  | 42734883(+)       | Translocation |             | MMRC0392 | Treated            |
| UBE2G1  | 17  | 4145739(+)        | METTL2A  | 17  | 57876474(+)       | Long range    |             | MMRC0376 | Untreated          |
| UBE2K   | 4   | 39415510          |          |     |                   | Missense      | P47S        | MMRC0286 | Untreated          |
| UBE3A   | 15  | 23152179          |          |     |                   | Missense      | L673I       | MMRC0332 | Treated            |
| UBN1    | 16  | 4850931           |          |     |                   | Missense      | D313N       | MMRC0392 | Treated            |
| UBN2    | 7   | 138619193         |          |     |                   | Missense      | S1001F      | MMRC0286 | Untreated          |
| UBTD2   | 1   | 148783772(-)      |          | 5   | 171603083(+)      | Translocation |             | MMRC0392 | Treated            |
| UBTF    | 17  | 39603224(-)       |          | 17  | 39647441(-)       | Inversion     |             | MMRC0319 | Untreated          |
| UGGT1   | 2   | 128612876         |          |     |                   | Missense      | A567P       | MMRC0389 | Treated            |
| UMOD    | 16  | 20265062          |          |     |                   | Missense      | V357F       | MMRC0421 | Treated            |
| UMODL1  | 21  | 42404245          |          |     |                   | Missense      | G615D       | MMRC0282 | Treated            |
| UNC5B   | 10  | 72728987          |          |     |                   | Missense      | E929K       | MMRC0286 | Untreated          |
| UNC5C   | 4   | 96594518(+)       | OLFML2A  | 9   | 126610291(-)      | Translocation |             | MMRC0191 | Treated            |
| UNC5D   | 8   | 35658077(+)       | IDO2     | 8   | 39919674(-)       | Long range    |             | MMRC0309 | Untreated          |
| UNC5D   | 2   | 122721177(-)      |          | 8   | 35672344(+)       | Translocation |             | MMRC0309 | Untreated          |
| UPF1    | 19  | 18832645          |          |     |                   | Missense      | A771T       | MMRC0425 | Untreated          |
| UPP1    | 7   | 48113195          |          |     |                   | Missense      | F213V       | MMRC0347 | Untreated          |
| USH2A   | 1   | 213890739         |          |     |                   | Missense      | A4721S      | MMRC0347 | Untreated          |
| USP10   | 16  | 83370008          |          |     |                   | Missense      | Y739C       | MMRC0406 | Untreated          |
| USP19   | 3   | 49127775          |          |     |                   | Missense      | N535Y       | MMRC0319 | Untreated          |
| USP22   | 17  | 20865096          |          |     |                   | Missense      | L114V       | MMRC0389 | Treated            |
| USP26   | X   | 131988659         |          |     |                   | Missense      | Q419P       | MMRC0389 | Treated            |
| USP32   | 17  | 55615523          |          |     |                   | Missense      | R1303Q      | MMRC0359 | Untreated          |
| USP34   | 2   | 61303929          |          |     |                   | Missense      | L2534F      | MMRC0389 | Treated            |
| USP6    | 17  | 5012036           |          |     |                   | Missense      | T1041N      | MMRC0389 | Treated            |
| USP7    | 16  | 8916653           |          |     |                   | Missense      | D346A       | MMRC0392 | Treated            |
| USP9X   | X   | 40945333          |          |     |                   | Missense      | K1560N      | MMRC0344 | Treated            |
| UTP20   | 12  | 100262507         |          |     |                   | Missense      | G1485R      | MMRC0308 | Treated            |
| UVRAG   | 11  | 75396263          |          |     |                   | Missense      | R317C       | MMRC0004 | Untreated          |
| VAT1L   | 16  | 76467830          |          |     |                   | Missense      | G262V       | MMRC0242 | Treated            |
| VAV3    | 1   | 107945904(+)      |          | 1   | 107954405(-)      | Deletion      |             | MMRC0332 | Treated            |
| VCAN    | 5   | 82853306          |          |     |                   | Missense      | T1142R      | MMRC0381 | Untreated          |
| VCAN    | 5   | 82853255          |          |     |                   | Missense      | R1125H      | MMRC0387 | Untreated          |
| VDAC3   | 8   | 42382102          |          |     |                   | Missense      | H273Y       | MMRC0338 | Untreated          |
| VEPH1   | 3   | 158581637         |          |     |                   | Splice site   | R376_splice | MMRC0332 | Treated            |
| VGLL3   | 3   | 87100694          |          |     |                   | Missense      | V225M       | MMRC0389 | Treated            |
| VIM     | 10  | 17315685          |          |     |                   | Missense      | E240K       | MMRC0421 | Treated            |
| VPS13D  | 1   | 12255030(+)       |          | 2   | 236016644(+)      | Translocation |             | MMRC0389 | Treated            |
| VPS13D  | 1   | 12255177(-)       |          | 2   | 236016671(-)      | Translocation |             | MMRC0389 | Treated            |
| VPS45   | 1   | 148315338(-)      | HCN2     | 19  | 559235(-)         | Translocation |             | MMRC0383 | Treated            |
| VPS45   | 1   | 148307193(-)      | PACS2    | 14  | 104856122(-)      | Translocation |             | MMRC0383 | Treated            |
| VSIG1   | X   | 107206989         |          |     |                   | Missense      | A296T       | MMRC0216 | Untreated          |
| VWA2    | 10  | 116039167         |          |     |                   | Missense      | S684F       | MMRC0191 | Treated            |
| VWA2    | 10  | 116035876         |          |     |                   | Missense      | P396S       | MMRC0359 | Untreated          |
| WDR1    | 4   | 9725369(+)        |          | 4   | 9732688(-)        | Deletion      |             | MMRC0191 | Treated            |
| WDR25   | 14  | 99917161          |          |     |                   | Missense      | D49E        | MMRC0421 | Treated            |
| WDR5    | 9   | 135996944         |          |     |                   | Missense      | S106L       | MMRC0319 | Untreated          |
| WDR54   | 2   | 74504525          |          |     |                   | Missense      | P148T       | MMRC0308 | Treated            |
| WDR59   | 16  | 73477148          |          |     |                   | Missense      | C865S       | MMRC0335 | Treated            |
| WDR66   | 12  | 120890395         |          |     |                   | Missense      | G903D       | MMRC0381 | Untreated          |
| WDR7    | 18  | 52575176          |          |     |                   | Nonsense      | S785*       | MMRC0392 | Treated            |
| WDR74   | 11  | 62357109          |          |     |                   | Missense      | A350V       | MMRC0242 | Treated            |
| WHSC1   | 4   | 1835231(+)        |          | 4   | 1872509(-)        | Deletion      |             | MMRC0421 | Treated            |

Supplementary Table 3 (continued)

| Gene    | Chr | Position (strand) | 2nd gene | Chr | Position (strand) | Type                 | AA change | Sample   | Previously treated |
|---------|-----|-------------------|----------|-----|-------------------|----------------------|-----------|----------|--------------------|
| WHSC1   | 4   | 1946876           |          |     |                   | Missense             | C1191F    | MMRC0282 | Treated            |
| WHSC1   | 4   | 1889733           |          |     |                   | Missense             | A332D     | MMRC0332 | Treated            |
| WHSC1   | 4   | 1873834(+)        |          | 14  | 105247118(+)      | Translocation        |           | MMRC0376 | Untreated          |
| WHSC1   | 4   | 1885576(-)        |          | 14  | 105397012(-)      | Translocation        |           | MMRC0319 | Untreated          |
| WHSC1L1 | 8   | 38276217          |          |     |                   | Missense             | Y887C     | MMRC0332 | Treated            |
| WHSC1L1 | 8   | 38276213          |          |     |                   | Missense             | K888N     | MMRC0309 | Untreated          |
| WHSC2   | 4   | 1966247(-)        |          | 6   | 14321056(-)       | Translocation        |           | MMRC0332 | Treated            |
| WHSC2   | 4   | 1966507(+)        |          | 6   | 14321021(+)       | Translocation        |           | MMRC0332 | Treated            |
| XBP1    | 22  | 27521317          |          |     |                   | Missense             | P326R     | MMRC0191 | Treated            |
| XBP1    | 22  | 27522135          |          |     |                   | Missense             | L167I     | MMRC0383 | Treated            |
| XPO4    | 13  | 20294410          |          |     |                   | Missense             | E287K     | MMRC0191 | Treated            |
| ZAN     | 7   | 100185303(+)      |          | 11  | 102426910(-)      | Translocation        |           | MMRC0191 | Treated            |
| ZBTB16  | 2   | 30876558(+)       |          | 11  | 113611495(+)      | Translocation        |           | MMRC0191 | Treated            |
| ZBTB3   | 11  | 62276356          |          |     |                   | Missense             | R503C     | MMRC0191 | Treated            |
| ZBTB33  | 23  | 119271466(-)      |          | 23  | 119729737(-)      | Inversion            |           | MMRC0392 | Treated            |
| ZBTB33  | 23  | 119272900(+)      |          | 23  | 119715889(+)      | Inversion            |           | MMRC0392 | Treated            |
| ZBTB33  | X   | 119272483         |          |     |                   | Missense             | I395M     | MMRC0173 | Treated            |
| ZBTB45  | 19  | 63719702          |          |     |                   | Missense             | P384L     | MMRC0381 | Untreated          |
| ZC3H11A | 1   | 111118279(+)      |          | 1   | 202075934(+)      | Long range           |           | MMRC0332 | Treated            |
| ZC3H14  | 14  | 88110943          |          |     |                   | Missense             | E339K     | MMRC0389 | Treated            |
| ZC3H15  | 2   | 187078496         |          |     |                   | Missense             | Q264R     | MMRC0242 | Treated            |
| ZC3H18  | 16  | 87192225          |          |     |                   | Frame shift deletion | A276fs    | MMRC0347 | Untreated          |
| ZC3H18  | 16  | 87171190          |          |     |                   | Missense             | S53T      | MMRC0216 | Untreated          |
| ZCCHC5  | X   | 77799925          |          |     |                   | Missense             | E217K     | MMRC0390 | Treated            |
| ZCWPW2  | 3   | 28484449(-)       |          | 3   | 28577758(-)       | Inversion            |           | MMRC0421 | Treated            |
| ZFP36L1 | 14  | 68327402(+)       |          | 14  | 105397362(-)      | Long range           |           | MMRC0309 | Untreated          |
| ZFPM2   | 8   | 106883425         |          |     |                   | Missense             | S647P     | MMRC0242 | Treated            |
| ZFYVE1  | 14  | 72512119          |          |     |                   | Missense             | M152V     | MMRC0322 | Untreated          |
| ZKSCAN3 | 6   | 28441507          |          |     |                   | Missense             | Q361H     | MMRC0286 | Untreated          |
| ZKSCAN5 | 7   | 98961878          |          |     |                   | Missense             | E427K     | MMRC0389 | Treated            |
| ZMYM4   | 1   | 35643226          |          |     |                   | Missense             | I1182V    | MMRC0406 | Untreated          |
| ZNF148  | 3   | 126434489         |          |     |                   | Missense             | S591A     | MMRC0344 | Treated            |
| ZNF193  | 6   | 28308679          |          |     |                   | Missense             | Y310C     | MMRC0406 | Untreated          |
| ZNF319  | 16  | 56588088          |          |     |                   | Missense             | H528R     | MMRC0359 | Untreated          |
| ZNF329  | 19  | 63331980          |          |     |                   | Nonsense             | E235*     | MMRC0319 | Untreated          |
| ZNF416  | 19  | 62775520          |          |     |                   | Missense             | Y522N     | MMRC0383 | Treated            |
| ZNF417  | 19  | 63115314          |          |     |                   | Missense             | C30Y      | MMRC0389 | Treated            |
| ZNF423  | 16  | 48229288          |          |     |                   | Missense             | E426Q     | MMRC0375 | Treated            |
| ZNF430  | 19  | 21007307(+)       |          | 19  | 33223164(-)       | Long range           |           | MMRC0376 | Untreated          |
| ZNF431  | 19  | 21122980(+)       |          | 19  | 22703537(+)       | Long range           |           | MMRC0421 | Treated            |
| ZNF431  | 19  | 21123381(-)       |          | 19  | 23120617(-)       | Long range           |           | MMRC0421 | Treated            |
| ZNF462  | 9   | 108728245         |          |     |                   | Missense             | P744L     | MMRC0408 | Untreated          |
| ZNF483  | 9   | 113344664         |          |     |                   | Missense             | R543Q     | MMRC0344 | Treated            |
| ZNF484  | 9   | 94649470          |          |     |                   | Missense             | G474R     | MMRC0376 | Untreated          |
| ZNF492  | 19  | 22639285          |          |     |                   | Missense             | T325N     | MMRC0412 | Treated            |
| ZNF492  | 19  | 22639569          |          |     |                   | Missense             | P420T     | MMRC0423 | Treated            |
| ZNF527  | 19  | 42571695          |          |     |                   | Missense             | Y302N     | MMRC0347 | Untreated          |
| ZNF530  | 19  | 62809897          |          |     |                   | Missense             | Q398E     | MMRC0329 | Treated            |
| ZNF559  | 19  | 9314103           |          |     |                   | Missense             | E326K     | MMRC0389 | Treated            |
| ZNF569  | 19  | 42595854          |          |     |                   | Missense             | H516Y     | MMRC0389 | Treated            |
| ZNF595  | 4   | 45633(+)          | DSCAM    | 21  | 40865053(+)       | Translocation        |           | MMRC0392 | Treated            |
| ZNF630  | X   | 47803595          |          |     |                   | Missense             | Q394K     | MMRC0375 | Treated            |
| ZNF646  | 16  | 30999336          |          |     |                   | Missense             | Q1397R    | MMRC0421 | Treated            |
| ZNF667  | 19  | 61645539          |          |     |                   | Missense             | T213A     | MMRC0242 | Treated            |
| ZNF700  | 19  | 11920239          |          |     |                   | Missense             | V134F     | MMRC0344 | Treated            |
| ZNF749  | 19  | 62647400          |          |     |                   | Missense             | E358Q     | MMRC0286 | Untreated          |
| ZNF761  | 19  | 58644701          |          |     |                   | Missense             | P47L      | MMRC0309 | Untreated          |
| ZNF804A | 2   | 185509380         |          |     |                   | Missense             | E338K     | MMRC0389 | Treated            |
| ZNF83   | 19  | 57808751          |          |     |                   | Missense             | E293V     | MMRC0383 | Treated            |
| ZNF830  | 17  | 30313793          |          |     |                   | Missense             | W365C     | MMRC0308 | Treated            |
| ZNF878  | 19  | 12015828          |          |     |                   | Missense             | S510C     | MMRC0389 | Treated            |
| ZNRF3   | 22  | 27776888          |          |     |                   | Missense             | A807P     | MMRC0191 | Treated            |
| ZP1     | 11  | 60398998          |          |     |                   | Missense             | S530N     | MMRC0425 | Untreated          |
| ZP3     | 7   | 75907862          |          |     |                   | Missense             | H302R     | MMRC0191 | Treated            |
| ZRANB3  | 2   | 135824102         |          |     |                   | Missense             | R171S     | MMRC0242 | Treated            |
| ZSCAN4  | 19  | 62881934          |          |     |                   | Missense             | R384Q     | MMRC0322 | Untreated          |
| ZSWIM7  | 17  | 15835324(-)       | DSCAM    | 21  | 40354174(-)       | Translocation        |           | MMRC0392 | Treated            |
| ZZEF1   | 17  | 3901057           |          |     |                   | Missense             | H1877P    | MMRC0332 | Treated            |
| ZZEF1   | 17  | 3864229           |          |     |                   | Missense             | D2773H    | MMRC0389 | Treated            |
| ZZEF1   | 17  | 3858960           |          |     |                   | Missense             | T2924N    | MMRC0412 | Treated            |

Supplementary Table 3 (continued)

| Sample   | Chromosome | Position  | Wild-type allele | Mutated allele | Gene     | Mutation type | Residue change | Genotyping result |
|----------|------------|-----------|------------------|----------------|----------|---------------|----------------|-------------------|
| MMRC0338 | 8          | 39644716  | G                | A              | ADAM18   | Missense      | p.E457K        | True positive     |
| MMRC0383 | 11         | 129780757 | C                | T              | ADAMTS8  | Missense      | p.C859Y        | True positive     |
| MMRC0319 | 3          | 127356171 | G                | T              | ALDH1L1  | Missense      | p.N212K        | True positive     |
| MMRC0282 | 2          | 231835342 | A                | T              | ARMC9    | Missense      | p.Y369F        | False positive    |
| MMRC0335 | 5          | 159982131 | C                | T              | ATP10B   | Missense      | p.V554I        | True positive     |
| MMRC0344 | 17         | 38510440  | C                | A              | BRCA1    | Missense      | p.C91F         | True positive     |
| MMRC0322 | 14         | 92830943  | C                | T              | BTBD7    | Missense      | p.R59K         | True positive     |
| MMRC0308 | 7          | 81480722  | G                | C              | CACNA2D1 | Missense      | p.I421M        | False positive    |
| MMRC0322 | 11         | 69165273  | A                | G              | CCND1    | Missense      | p.Q4R          | True positive     |
| MMRC0335 | 11         | 69165400  | A                | T              | CCND1    | Missense      | p.K46N         | True positive     |
| MMRC0339 | 16         | 67421112  | C                | T              | CDH1     | Missense      | p.R784C        | True positive     |
| MMRC0347 | 16         | 74120718  | G                | A              | CHST5    | Missense      | p.R356C        | Assay failed      |
| MMRC0375 | 5          | 79066681  | A                | G              | CMYA5    | Missense      | p.I2113V       | True positive     |
| MMRC0335 | 8          | 3244433   | C                | T              | CSMD1    | Missense      | p.V766I        | True positive     |
| MMRC0343 | 8          | 2810771   | T                | A              | CSMD1    | Missense      | p.S3073C       | True positive     |
| MMRC0347 | 1          | 33931142  | C                | T              | CSMD2    | Missense      | p.E1303K       | True positive     |
| MMRC0335 | 1          | 33962836  | G                | A              | CSMD2    | Missense      | p.R878C        | True positive     |
| MMRC0308 | 8          | 114100564 | G                | A              | CSMD3    | Missense      | p.P313L        | True positive     |
| MMRC0004 | 12         | 110213632 | G                | A              | CUX2     | Missense      | p.R110H        | True positive     |
| MMRC0216 | 12         | 110256876 | G                | A              | CUX2     | Missense      | p.V1059I       | True positive     |
| MMRC0282 | 9          | 89507784  | C                | A              | DAPK1    | Missense      | p.H964Q        | True positive     |
| MMRC0335 | 9          | 89486233  | G                | A              | DAPK1    | Missense      | p.G699E        | True positive     |
| MMRC0308 | 9          | 89511987  | A                | G              | DAPK1    | Missense      | p.K1394R       | True positive     |
| MMRC0329 | 12         | 47520116  | C                | T              | DDX23    | Missense      | p.D121N        | True positive     |
| MMRC0319 | 13         | 72234065  | C                | T              | DIS3     | Missense      | p.R750K        | True positive     |
| MMRC0308 | 13         | 72244372  | T                | G              | DIS3     | Missense      | p.S447R        | True positive     |
| MMRC0343 | 13         | 72244028  | A                | C              | DIS3     | Missense      | p.V474G        | True positive     |
| MMRC0376 | 1          | 153308070 | G                | A              | EFNA4    | Missense      | p.R196H        | True positive     |
| MMRC0359 | 6          | 94025844  | C                | T              | EPHA7    | Missense      | p.A625T        | True positive     |
| MMRC0191 | 1          | 94774262  | T                | A              | F3       | Missense      | p.T87S         | True positive     |
| MMRC0319 | 17         | 77630632  | C                | T              | FASN     | Missense      | p.A2430T       | True positive     |
| MMRC0284 | 19         | 44213752  | A                | C              | FBXO27   | Missense      | p.V138G        | False positive    |
| MMRC0309 | 3          | 48391853  | G                | C              | FBXW12   | Missense      | p.E98Q         | True positive     |
| MMRC0356 | 4          | 155726959 | C                | T              | FGA      | Missense      | p.G358R        | True positive     |
| MMRC0375 | 17         | 7286827   | T                | A              | FGF11    | Missense      | p.L200H        | True positive     |
| MMRC0338 | 14         | 64580830  | C                | T              | FNTB     | Missense      | p.R291C        | True positive     |
| MMRC0322 | 7          | 4763284   | G                | A              | FO XK1   | Missense      | p.R395Q        | True positive     |
| MMRC0004 | 3          | 71109797  | G                | A              | FOXP1    | Missense      | p.P407L        | True positive     |
| MMRC0423 | 7          | 113998137 | T                | A              | FOXP2    | Missense      | p.S100T        | True positive     |
| MMRC0329 | 11         | 65567324  | G                | C              | GAL3ST3  | Missense      | p.P176A        | Assay failed      |
| MMRC0173 | 12         | 48785727  | T                | G              | GPD1     | Missense      | p.S117A        | True positive     |
| MMRC0028 | 10         | 25901622  | T                | C              | GPR158   | Missense      | p.I518T        | True positive     |
| MMRC0322 | 10         | 87474414  | C                | A              | GRID1    | Splice site   |                | False positive    |
| MMRC0383 | 10         | 87618868  | C                | A              | GRID1    | Missense      | p.R277M        | True positive     |
| MMRC0284 | 10         | 87363311  | C                | A              | GRID1    | Missense      | p.D812Y        | True positive     |
| MMRC0216 | 1          | 220782114 | G                | C              | HHIPL2   | Missense      | p.I327M        | True positive     |
| MMRC0344 | 1          | 114310366 | C                | T              | HIPK1    | Missense      | p.T777I        | True positive     |
| MMRC0322 | 1          | 87330920  | C                | T              | HS2ST1   | Nonsense      | p.R190*        | True positive     |
| MMRC0338 | 5          | 132431102 | T                | G              | HSPA4    | Missense      | p.L87R         | True positive     |
| MMRC0028 | 21         | 40059472  | G                | A              | IGSF5    | Missense      | p.V81I         | True positive     |

**Supplementary Table 4 – Validation of point mutations.** Genotyping was performed using a mass spectrometry-based method (Sequenom).



| Sample   | Chromosome | Position  | Wild-type allele | Mutated allele | Gene     | Mutation type | Residue change | Genotyping result |
|----------|------------|-----------|------------------|----------------|----------|---------------|----------------|-------------------|
| MMRC0423 | 6          | 339972    | A                | G              | IRF4     | Missense      | p.K123R        | True positive     |
| MMRC0339 | 6          | 339972    | A                | G              | IRF4     | Missense      | p.K123R        | True positive     |
| MMRC0028 | 16         | 53522742  | C                | T              | IRX5     | Missense      | p.A44V         | True positive     |
| MMRC0339 | 5          | 52254425  | A                | C              | ITGA1    | Missense      | p.E785A        | True positive     |
| MMRC0423 | 1          | 150041224 | G                | A              | LINGO4   | Missense      | p.T194I        | True positive     |
| MMRC0308 | 8          | 23235653  | C                | G              | LOXL2    | Missense      | p.G413R        | True positive     |
| MMRC0344 | 12         | 25134396  | G                | C              | LRMP     | Missense      | p.E202Q        | True positive     |
| MMRC0347 | 12         | 1813952   | G                | A              | LRTM2    | Missense      | p.R306Q        | True positive     |
| MMRC0173 | X          | 43400553  | C                | T              | MAOA     | Missense      | p.A7V          | Assay failed      |
| MMRC0173 | 7          | 100626060 | C                | T              | MOGAT3   | Missense      | p.E305K        | True positive     |
| MMRC0375 | 1          | 43576423  | C                | A              | MPL      | Missense      | p.T49N         | True positive     |
| MMRC0335 | 22         | 24730698  | T                | A              | MYO18B   | Missense      | p.I2116N       | True positive     |
| MMRC0344 | 22         | 24577473  | G                | A              | MYO18B   | Missense      | p.R1271Q       | Assay failed      |
| MMRC0376 | 2          | 152092285 | G                | A              | NEB      | Missense      | p.P5553S       | True positive     |
| MMRC0173 | 2          | 152289034 | C                | T              | NEB      | Missense      | p.A200T        | Assay failed      |
| MMRC0319 | 10         | 21160467  | C                | T              | NEBL     | Missense      | p.V501M        | True positive     |
| MMRC0319 | 4          | 149254800 | C                | T              | NR3C2    | Missense      | p.E902K        | True positive     |
| MMRC0308 | 4          | 149400600 | A                | C              | NR3C2    | Missense      | p.F626C        | True positive     |
| MMRC0309 | 5          | 37387135  | T                | G              | NUP155   | Missense      | p.T154P        | True positive     |
| MMRC0191 | 5          | 37353901  | G                | A              | NUP155   | Missense      | p.P692S        | True positive     |
| MMRC0356 | 1          | 245818830 | C                | A              | OR2G2    | Nonsense      | p.C182*        | True positive     |
| MMRC0309 | 2          | 178934702 | G                | C              | OSBPL6   | Missense      | p.E401Q        | True positive     |
| MMRC0216 | 5          | 140235327 | G                | T              | PCDHA12  | Missense      | p.G29V         | True positive     |
| MMRC0329 | 10         | 119124316 | C                | T              | PDZD8    | Missense      | p.R138H        | True positive     |
| MMRC0329 | 4          | 129031759 | A                | C              | PLK4     | Missense      | p.E631D        | True positive     |
| MMRC0322 | 2          | 135636644 | T                | A              | RAB3GAP1 | Missense      | p.L780Q        | True positive     |
| MMRC0343 | 3          | 197714230 | A                | T              | RNF168   | Missense      | p.L71H         | True positive     |
| MMRC0282 | X          | 153281344 | A                | G              | RPL10    | Missense      | p.E66G         | Assay failed      |
| MMRC0347 | X          | 153281355 | A                | C              | RPL10    | Missense      | p.I70L         | Assay failed      |
| MMRC0282 | 20         | 34989013  | C                | G              | SAMHD1   | Missense      | p.E228Q        | True positive     |
| MMRC0282 | 20         | 34989043  | C                | G              | SAMHD1   | Missense      | p.D218H        | True positive     |
| MMRC0216 | 7          | 83430493  | C                | A              | SEMA3A   | Missense      | p.W608C        | True positive     |
| MMRC0284 | 3          | 166233893 | G                | A              | SI       | Missense      | p.T850I        | True positive     |
| MMRC0375 | 3          | 166208477 | T                | A              | SI       | Missense      | p.M1395L       | Assay failed      |
| MMRC0173 | 2          | 74303586  | G                | A              | SLC4A5   | Missense      | p.P1099L       | True positive     |
| MMRC0356 | 11         | 130278478 | C                | T              | SNX19    | Missense      | p.E819K        | True positive     |
| MMRC0356 | 16         | 2752059   | C                | T              | SRRM2    | Missense      | p.S510F        | True positive     |
| MMRC0359 | 4          | 167144015 | C                | T              | TLL1     | Nonsense      | p.R219*        | True positive     |
| MMRC0335 | 15         | 60729590  | T                | C              | TLN2     | Missense      | p.L51P         | True positive     |
| MMRC0191 | 19         | 12686754  | C                | T              | TNPO2    | Splice site   |                | True positive     |
| MMRC0376 | 2          | 179224655 | T                | A              | TTN      | Missense      | p.E10715V      | True positive     |
| MMRC0335 | 2          | 179190751 | C                | A              | TTN      | Nonsense      | p.E6793*       | True positive     |
| MMRC0335 | 2          | 179190752 | A                | C              | TTN      | Missense      | p.I6792M       | True positive     |
| MMRC0356 | 2          | 179178424 | G                | A              | TTN      | Missense      | p.P8883L       | True positive     |
| MMRC0319 | 3          | 49127775  | T                | A              | USP19    | Missense      | p.N535Y        | True positive     |
| MMRC0004 | 11         | 75396263  | C                | T              | UVRAG    | Missense      | p.R317C        | True positive     |
| MMRC0359 | 10         | 116035876 | C                | T              | VWA2     | Missense      | p.P396S        | True positive     |
| MMRC0191 | 10         | 116039167 | C                | T              | VWA2     | Missense      | p.S684F        | True positive     |
| MMRC0383 | 19         | 62775520  | A                | T              | ZNF416   | Missense      | p.Y522N        | True positive     |
| MMRC0173 | 17         | 3954844   | T                | G              | ZZEF1    | Missense      | p.T469P        | False positive    |

Supplementary Table 4 (continued)

| Sample   | Chromosome | Position  | Insertion or deletion | Inserted/deleted sequence           | Gene     | Genotyping result |
|----------|------------|-----------|-----------------------|-------------------------------------|----------|-------------------|
| MMRC0427 | 2          | 9562800   | Deletion              | TTCAGATACATGATGCCAGGATCACACTCTTCTCC | ADAM17   | True positive     |
| MMRC0381 | 3          | 56764144  | Insertion             | G                                   | ARHGEF3  | True positive     |
| MMRC0286 | 1          | 52926231  | Insertion             | G                                   | C1orf163 | True positive     |
| MMRC0412 | 1          | 117967150 | Deletion              | TAAC                                | FAM46C   | True positive     |
| MMRC0244 | 2          | 14692207  | Deletion              | G                                   | FAM84A   | False positive    |
| MMRC0381 | 2          | 239674222 | Deletion              | G                                   | HDAC4    | False positive    |
| MMRC0387 | X          | 142546379 | Deletion              | A                                   | SLITRK4  | True positive     |
| MMRC0309 | 21         | 32933263  | Deletion              | A                                   | SYNJ1    | True positive     |
| MMRC0309 | 14         | 102433378 | Insertion             | A                                   | TRAF3    | True positive     |
| MMRC0347 | 16         | 87192225  | Deletion              | C                                   | ZC3H18   | True positive     |

**Supplementary Table 5 – Validation of small indels.** Genotyping was performed using a mass spectrometry-based method (Sequenom). Only assays that could successfully be designed are shown.



| Gene    | Chr | Position (strand) | Chr | Position (strand) | Type          | AA change | Sample   | Previously treated |
|---------|-----|-------------------|-----|-------------------|---------------|-----------|----------|--------------------|
| EIF3B   | 7   | 2385341           |     |                   | Missense      | Y760F     | MMRC0343 | Treated            |
| LRRK2   | 12  | 38918064          |     |                   | Missense      | E155K     | MMRC0286 | Untreated          |
| LRRK2   | 12  | 38994132          |     |                   | Missense      | I1543S    | MMRC0344 | Treated            |
| LRRK2   | 12  | 38953506(+)       | 18  | 8522903(+)        | Translocation |           | MMRC0376 | Untreated          |
| LRRK2   | 12  | 38953703(-)       | 18  | 8522979(-)        | Translocation |           | MMRC0376 | Untreated          |
| RPL10   | X   | 153281344         |     |                   | Missense      | E66G      | MMRC0282 | Treated            |
| RPS6KA1 | 1   | 26754634          |     |                   | Nonsense      | Q283*     | MMRC0335 | Treated            |
| XBP1    | 22  | 27521317          |     |                   | Missense      | P326R     | MMRC0191 | Treated            |
| XBP1    | 22  | 27522135          |     |                   | Missense      | L167I     | MMRC0383 | Treated            |

**Supplementary Table 6 – Mutations in genes involved in protein translation, stability, and the unfolded protein response.** These mutations were not significant on their own, but are considered in conjunction with the statistically significant *DIS3* and *FAM46C* mutations.

| Gene     | Chr | Position (strand) | Chr | Position (strand) | Type           | AA change | Sample   | Previously treated | Effect of gene on NF- $\kappa$ B | Likely effect of mutation on gene function                           |
|----------|-----|-------------------|-----|-------------------|----------------|-----------|----------|--------------------|----------------------------------|----------------------------------------------------------------------|
| BTRC     | 10  | 103288069         |     |                   | Missense       | A536G     | MMRC0286 | Untreated          | Activation                       |                                                                      |
| CARD11   | 7   | 2930442           |     |                   | Missense       | Y631H     | MMRC0375 | Treated            | Activation                       |                                                                      |
| CARD11   | 7   | 2925677           |     |                   | Missense       | D789N     | MMRC0425 | Untreated          | Activation                       |                                                                      |
| CYLD     | 16  | 49378431(+)       | 16  | 49379310(-)       | Deletion       |           | MMRC0335 | Treated            | Inactivation                     | Loss (deletion)                                                      |
| IKBIP    | 12  | 97531523          |     |                   | Missense       | E342K     | MMRC0319 | Untreated          | Unknown                          |                                                                      |
| IKBKB    | 8   | 42283051          |     |                   | Missense       | K171E     | MMRC0427 | Treated            | Activation                       |                                                                      |
| MAP3K1   | 5   | 56209516(-)       | 8   | 42575852(+)       | Translocation  |           | MMRC0344 | Treated            | Activation                       |                                                                      |
| MAP3K14  | 17  | 40720277(+)       | 17  | 40725216(-)       | Deletion       |           | MMRC0319 | Untreated          | Activation                       |                                                                      |
| RIPK4    | 21  | 42034912          |     |                   | Missense       | Q504K     | MMRC0347 | Untreated          | Activation                       |                                                                      |
| TLR4     | 9   | 119515407         |     |                   | Missense       | S394C     | MMRC0308 | Treated            | Activation                       |                                                                      |
| TNFRSF1A | 12  | 6310138           |     |                   | Missense       | G209D     | MMRC0427 | Treated            | Activation                       |                                                                      |
| TRAF3    | 14  | 102433378         |     |                   | Insertion (FS) | E283fs    | MMRC0309 | Untreated          | Inactivation                     | Loss (frame-shift)                                                   |
| TRAF3    | 14  | 102441819         |     |                   | Missense       | D551V     | MMRC0173 | Treated            | Inactivation                     | Loss (high FI mutation affecting MATH, i.e. NIK-interacting, domain) |

**Supplementary Table 7 – Point mutations and re-arrangements of genes affecting activation of NF- $\kappa$ B.** Point mutations achieved significance as part of a gene set ( $p = 0.016$ ).

| Gene | Chr | Position (strand) | Type     | AA change | Sample   | Previously treated |
|------|-----|-------------------|----------|-----------|----------|--------------------|
| F3   | 1   | 94774262          | Missense | T87S      | MMRC0191 | Treated            |
| F5   | 1   | 167772526         | Missense | D1605N    | MMRC0389 | Treated            |
| FGA  | 4   | 155726959         | Missense | G358R     | MMRC0356 | Untreated          |
| FGA  | 4   | 155726404         | Missense | E543K     | MMRC0389 | Treated            |
| FGG  | 4   | 155753196         | Missense | H6Y       | MMRC0376 | Untreated          |
| TFPI | 2   | 188069997         | Missense | D59N      | MMRC0322 | Untreated          |

**Supplementary Table 8 – Mutations in genes involved in generation of the fibrin clot.** These mutations achieved significance as part of a gene set in an unbiased search of the MSigDB ( $q = 0.0054$  after correction for multiple hypothesis testing).

| Chr | Start     | End       | Length | Muts | Samples | p-value  | q-value  |
|-----|-----------|-----------|--------|------|---------|----------|----------|
| 2   | 88908630  | 88909380  | 750    | 3    | 2       | 1.55E-06 | 4.00E-02 |
| 2   | 88939740  | 88939930  | 190    | 4    | 3       | 2.21E-11 | 1.70E-06 |
| 2   | 88940090  | 88940430  | 340    | 5    | 3       | 1.62E-13 | 1.68E-08 |
| 2   | 88940600  | 88940670  | 70     | 2    | 2       | 3.41E-06 | 7.05E-02 |
| 2   | 88940800  | 88941190  | 390    | 9    | 6       | 1.85E-14 | 4.42E-09 |
| 2   | 88941490  | 88941690  | 200    | 6    | 6       | 7.22E-15 | 4.42E-09 |
| 2   | 88941840  | 88942340  | 500    | 18   | 7       | 1.28E-14 | 4.42E-09 |
| 2   | 88946120  | 88946140  | 20     | 2    | 1       | 1.66E-07 | 6.57E-03 |
| 2   | 88946300  | 88946650  | 350    | 5    | 4       | 4.02E-13 | 3.83E-08 |
| 2   | 89027740  | 89028620  | 880    | 3    | 2       | 5.70E-07 | 1.86E-02 |
| 2   | 89276310  | 89277630  | 1320   | 5    | 2       | 6.89E-12 | 5.65E-07 |
| 2   | 89400240  | 89401200  | 960    | 3    | 3       | 1.87E-05 | 2.41E-01 |
| 3   | 188944110 | 188948430 | 4320   | 23   | 10      | 1.33E-13 | 1.43E-08 |
| 14  | 105121160 | 105122380 | 1220   | 2    | 2       | 6.09E-06 | 1.13E-01 |
| 14  | 105122930 | 105129920 | 6990   | 3    | 3       | 1.77E-05 | 2.34E-01 |
| 14  | 105178690 | 105186230 | 7540   | 11   | 6       | 6.67E-14 | 8.35E-09 |
| 14  | 105246120 | 105250860 | 4740   | 25   | 11      | 2.76E-14 | 4.42E-09 |
| 14  | 105277850 | 105285620 | 7770   | 10   | 5       | 2.20E-14 | 4.42E-09 |
| 14  | 105309360 | 105313440 | 4080   | 12   | 7       | 9.33E-15 | 4.42E-09 |
| 14  | 105394150 | 105395580 | 1430   | 8    | 5       | 6.55E-15 | 4.42E-09 |
| 14  | 105395780 | 105398150 | 2370   | 34   | 14      | 2.44E-14 | 4.42E-09 |
| 14  | 105398300 | 105398980 | 680    | 25   | 13      | 2.72E-14 | 4.42E-09 |
| 14  | 105399330 | 105399630 | 300    | 4    | 3       | 1.46E-09 | 8.70E-05 |
| 14  | 105399840 | 105403470 | 3630   | 102  | 21      | 2.70E-14 | 4.42E-09 |
| 14  | 105420980 | 105421100 | 120    | 1    | 1       | 1.33E-05 | 1.87E-01 |
| 14  | 105565150 | 105565450 | 300    | 2    | 1       | 1.71E-05 | 2.31E-01 |
| 14  | 105657690 | 105657780 | 90     | 2    | 1       | 3.19E-06 | 6.84E-02 |
| 14  | 105861960 | 105862770 | 810    | 4    | 2       | 2.53E-10 | 1.72E-05 |
| 14  | 105876070 | 105876860 | 790    | 3    | 2       | 1.30E-06 | 3.55E-02 |
| 14  | 106240900 | 106241490 | 590    | 6    | 4       | 6.00E-13 | 5.49E-08 |
| 14  | 106249830 | 106250300 | 470    | 34   | 19      | 2.35E-14 | 4.42E-09 |
| 14  | 106330320 | 106330790 | 470    | 3    | 2       | 9.04E-07 | 2.69E-02 |
| 22  | 21359460  | 21359930  | 470    | 4    | 2       | 3.00E-09 | 1.74E-04 |
| 22  | 21376460  | 21377500  | 1040   | 6    | 1       | 2.38E-12 | 2.02E-07 |
| 22  | 21528380  | 21529390  | 1010   | 7    | 5       | 2.94E-14 | 4.42E-09 |
| 22  | 21553070  | 21553180  | 110    | 5    | 5       | 1.55E-15 | 3.70E-09 |
| 22  | 21553290  | 21553620  | 330    | 23   | 10      | 7.77E-15 | 4.42E-09 |
| 22  | 21556900  | 21558010  | 1110   | 7    | 6       | 2.98E-14 | 4.42E-09 |
| 22  | 21559860  | 21560570  | 710    | 4    | 3       | 8.56E-11 | 6.36E-06 |
| 22  | 21560700  | 21560820  | 120    | 3    | 2       | 7.64E-10 | 4.66E-05 |
| 22  | 21561130  | 21561410  | 280    | 4    | 4       | 1.15E-10 | 8.26E-06 |
| 22  | 21571780  | 21573590  | 1810   | 3    | 3       | 2.77E-07 | 1.02E-02 |
| 22  | 21576990  | 21579030  | 2040   | 6    | 3       | 3.05E-13 | 3.02E-08 |
| 22  | 21607620  | 21608750  | 1130   | 3    | 2       | 3.18E-06 | 6.84E-02 |

**Supplementary Table 9 – Non-coding regulatory potential analysis identifies multiple sites that exhibit somatic hypermutation.** Regions are Ig $\kappa$  (chromosome 2), BCL6 promoter/intron (chromosome 3), IgH (chromosome 14), and Ig $\lambda$  (chromosome 22).

| Chr | Position  | Gene               | Ref | Mut | Sample  | Putative binding sites                                                  |
|-----|-----------|--------------------|-----|-----|---------|-------------------------------------------------------------------------|
| 1   | 554731    | AK125248 (IGR)     | T   | C   | MM-0343 | GATA-1/stress-response element                                          |
| 1   | 555225    | AK125248 (IGR)     | G   | A   | MM-0425 | none                                                                    |
| 1   | 555269    | AK125248 (IGR)     | C   | T   | MM-0309 | STAT5a                                                                  |
| 1   | 82793242  | TTL7/LPHN2 (IGR)   | G   | A   | MM-0375 | HOXA3                                                                   |
| 1   | 82793250  | TTL7/LPHN2 (IGR)   | G   | T   | MM-0343 | deltaEF1                                                                |
| 1   | 147333845 | NBPFA (IGR)        | C   | T   | MM-0387 | STAT4                                                                   |
| 1   | 147334295 | NBPFA (IGR)        | A   | G   | MM-0408 | paired box factor 2/STAT4/STAT5a                                        |
| 1   | 147334296 | NBPFA (IGR)        | C   | G   | MM-0408 | paired box factor 2/STAT4/STAT5a/Dof3                                   |
| 1   | 147334380 | NBPFA (IGR)        | T   | C   | MM-0425 | HOXA3/STAT5a                                                            |
| 2   | 40865609  | SLC8A1/PKDCC (IGR) | C   | A   | MM-0387 | alcohol dehydrogenase gene regulator 1                                  |
| 2   | 40865611  | SLC8A1/PKDCC (IGR) | A   | C   | MM-0389 | Dof2/Dof3/paired box factor 2/alcohol dehydrogenase gene regulator 1    |
| 3   | 149273928 | ZIC4/AGTR1 (IGR)   | A   | G   | MM-0335 | CdxA                                                                    |
| 3   | 149274006 | ZIC4/AGTR1 (IGR)   | A   | G   | MM-0332 | engrailed 1                                                             |
| 3   | 189142836 | BCL6/LPP (IGR)     | A   | C   | MM-0421 | paired box factor 2/Dof3/STAT4/STAT5a                                   |
| 3   | 189143134 | BCL6/LPP (IGR)     | T   | C   | MM-0343 | none                                                                    |
| 3   | 189143142 | BCL6/LPP (IGR)     | G   | C   | MM-0387 | STAT1/STAT3/STAT4/STAT5a/STAT6/paired box factor 2/Ikaros 2             |
| 3   | 189143159 | BCL6/LPP (IGR)     | A   | C   | MM-0242 | STAT1/STAT3/STAT4/STAT5a/STAT6                                          |
| 3   | 189143285 | BCL6/LPP (IGR)     | A   | G   | MM-0242 | Dof2/Dof3/paired box factor 2                                           |
| 3   | 189143311 | BCL6/LPP (IGR)     | T   | G   | MM-0343 | none                                                                    |
| 3   | 189143391 | BCL6/LPP (IGR)     | A   | C   | MM-0376 | none                                                                    |
| 3   | 189143392 | BCL6/LPP (IGR)     | T   | G   | MM-0376 | none                                                                    |
| 3   | 189440883 | LPP (Intron)       | G   | C   | MM-0335 | paired box factor 2/Dof1                                                |
| 3   | 189440884 | LPP (Intron)       | G   | T   | MM-0344 | Dof1                                                                    |
| 3   | 189441175 | LPP (Intron)       | G   | A   | MM-0412 | Ikaros 2/GATA-2/GATA-6/RAV1 (AP2 interacting)/deltaEF1                  |
| 4   | 157902239 | PDGFC (3'-UTR)     | T   | C   | MM-0387 | STAT5a/heat-shock factor/paired box factor 2/Dof1/Dof3                  |
| 4   | 157903235 | PDGFC (3'-UTR)     | A   | T   | MM-0408 | Hunchback                                                               |
| 4   | 157903658 | PDGFC (3'-UTR)     | C   | G   | MM-0309 | none                                                                    |
| 4   | 157904101 | PDGFC (Intron)     | T   | G   | MM-0191 | GATA-1/GATA-1/GATA-6                                                    |
| 4   | 39875936  | RHOH (Intron)      | C   | T   | MM-0191 | Ikaros 2/STAT1/STAT3/STAT4/STAT5a/STAT6/GATA-1                          |
| 4   | 39876045  | RHOH (Intron)      | A   | G   | MM-0387 | GATA-1/GATA-2                                                           |
| 4   | 39876457  | RHOH (Intron)      | A   | G   | MM-0387 | heat shock factor/STAT5a                                                |
| 4   | 62180565  | LPHN3 (Intron)     | T   | G   | MM-0389 | none                                                                    |
| 4   | 62180776  | LPHN3 (Intron)     | T   | A   | MM-0390 | paired box 2/Dof3                                                       |
| 4   | 62181208  | LPHN3 (Intron)     | T   | G   | MM-0425 | Deformed/HOXA3/octamer factor 1                                         |
| 4   | 7819489   | AFAP1 (Intron)     | G   | A   | MM-0242 | none                                                                    |
| 4   | 7819515   | AFAP1 (Intron)     | C   | T   | MM-0309 | none                                                                    |
| 7   | 92754257  | CCDC132 (Intron)   | T   | A   | MM-0343 | none                                                                    |
| 7   | 92754258  | CCDC132 (Intron)   | A   | T   | MM-0387 | none                                                                    |
| 9   | 16564622  | BNC2 (Intron)      | C   | A   | MM-0412 | paired box factor 2/STAT3/STAT4/STAT5a/STAT6                            |
| 9   | 16564872  | BNC2 (Intron)      | C   | G   | MM-0335 | none                                                                    |
| 9   | 16564948  | BNC2 (Intron)      | A   | G   | MM-0412 | paired box factor 2/Dof1/GATA-6                                         |
| 12  | 120943427 | BCL7A (Promoter)   | C   | G   | MM-0412 | engrailed 1                                                             |
| 12  | 120943444 | BCL7A (Promoter)   | T   | G   | MM-0390 | HOXA3/deltaEF1                                                          |
| 12  | 120943453 | BCL7A (Promoter)   | A   | C   | MM-0406 | deltaEF1/STAT4/GATA-1                                                   |
| 12  | 120943777 | BCL7A (Promoter)   | T   | G   | MM-0390 | cap signal for transcription initiation                                 |
| 12  | 120945822 | BCL7A (Intron)     | C   | T   | MM-0390 | c-Myc/AhR nuclear translocator/USF                                      |
| 12  | 120946479 | BCL7A (Intron)     | A   | C   | MM-0421 | paired box factor 2/sex-determining region Y gene product/GATA-1/GATA-2 |
| 12  | 120946774 | BCL7A (Intron)     | T   | C   | MM-0309 | STAT5a/heat shock factor/HOXA3                                          |
| 14  | 68328421  | ZFP36L1 (Intron)   | A   | G   | MM-0344 | CCAAT-enhancer binding factor/Ultrathorax                               |
| 14  | 68328818  | ZFP36L1 (Intron)   | G   | C   | MM-0191 | STAT5a/heat shock factor                                                |
| 14  | 68328974  | ZFP36L1 (Intron)   | T   | C   | MM-0392 | none                                                                    |
| 14  | 68329209  | ZFP36L1 (Intron)   | C   | G   | MM-0412 | paired box factor 2                                                     |
| 17  | 8108665   | PFAS (Intron)      | C   | T   | MM-0356 | none                                                                    |
| 17  | 8110148   | PFAS (Intron)      | C   | A   | MM-0392 | alcohol dehydrogenase gene regulator 1                                  |
| 17  | 8110537   | PFAS (Intron)      | C   | G   | MM-0392 | Meis1                                                                   |
| 17  | 8110620   | PFAS (Intron)      | C   | G   | MM-0392 | GATA-2                                                                  |
| 20  | 60329271  | LAMA5 (Synonymous) | G   | A   | MM-0447 | STAT4                                                                   |
| 20  | 60329391  | LAMA5 (Intron)     | G   | C   | MM-0356 | STAT5a                                                                  |

**Supplementary Table 10 – Potential transcription factor binding sites targeted by mutations in significantly mutated regulatory regions.** Binding sites were predicted using the publicly-available version of the TRANSFAC database (ref.).

| Amplicon                  | Primer sequence (sense)           | Primer sequence (antisense)       | Annealing temperature (°C) |
|---------------------------|-----------------------------------|-----------------------------------|----------------------------|
| chr1:554202-555412        | TCG TTT GAA ATG GTC ATC CA        | TGC GTA GTT GGG TTT GGT TT        | 55                         |
| chr1:82793145-82793343    | TGT TAC AAT GGC TGT GCT AAA       | AAA GGC CAA TCA TGA TGA GAA       | 55                         |
| chr3:149273859-149274108  | TGA AGC TAC AAA AGC TCT AAG AAA A | TGC AAA ATA GGC CAA CAA CA        | 55                         |
| chr3:189142479-189143663  | CGC TCA GAG AGA TCA ATG GAC       | TGT GTG TGG TGA GTA GGA AAG G     | 55                         |
| chr3:189440767-189441356  | GCT TAC AGC TTG CCT AAC AAG G     | TTT AAT ATA GCC AAT AGG GAG GTT C | 55                         |
| chr4:7819353-7819601      | AGC AGA GCC ACA GTT TCC AT        | TCT GAC GTA TTC CGG ATG TG        | 55                         |
| chr4:62180499-62181471    | AGG AAA TGA GTT TTT CGT TTT G     | TGC TCC AAT AGT CAG CTC CA        | 55                         |
| chr4:157901940-157902946  | CCA CCT ATC ACC AAG CAT TTC       | TGT TGG CTT TTC TAA TCT TGT TAA A | 55                         |
| chr4:157902805-157903743  | TCA TCT TTG TTC CTC TGG CTA       | GAG CAC CAT GAG GAG TGT GA        | 55                         |
| chr9:16564308-16565147    | CAT GCA AAA AGA CAG GTG TGA       | CTG TTC TGT CAT CTG TGA AAT GTG   | 55                         |
| chr12:120942955-120943524 | CCC GGC CAG TAT TTG TTC T         | GCC CCC AGA AGT TCT CTT GT        | 55                         |
| chr20:60328896-60329577   | CCT GCA CTG ACA CAT GTA CG        | GTG CTG GCC CTA CCT TCT C         | 55                         |

**Supplementary Table 11 – Primer sequences and annealing temperatures for PCR of RP regions.** All reactions comprised 35 cycles of PCR.

| <b>Gene</b> | <b>OSS</b>  | <b>Permutation score</b> |
|-------------|-------------|--------------------------|
| TSPY6P      | 6291.512653 | 0.018                    |
| LOC283352   | 5226.686439 | 0                        |
| HOXA9       | 3217.111381 | 0.012                    |
| PTPRZ1      | 2705.699055 | 0                        |
| F2R         | 2321.240087 | 0.006                    |
| KIAA0125    | 2315.404911 | 0                        |
| COL4A6      | 2260.239257 | 0.006                    |
| FSTL5       | 1650.941992 | 0.012                    |
| POPDC3      | 1611.195061 | 0.036                    |
| NRN1        | 1266.903751 | 0                        |
| ELMOD1      | 1219.562329 | 0.008                    |
| TRPM3       | 1108.72542  | 0.01                     |
| TMPRSS11E   | 1106.40036  | 0.016                    |
| SAMD3       | 1032.63057  | 0.01                     |
| GABRR1      | 873.944921  | 0.008                    |
| SYNPO2      | 820.740759  | 0.008                    |
| PRSS21      | 788.115356  | 0.01                     |
| GBA3        | 763.936377  | 0                        |
| HES1        | 754.020388  | 0.044                    |
| GNG11       | 750.429829  | 0                        |

**Supplementary Table 12 – Top 20 outliers by OSS analysis.** Only genes with a permutation score less than 0.05 are shown.

| Gene | Primer sequence (sense)       | Primer sequence (antisense)        | Annealing temperature (°C) |
|------|-------------------------------|------------------------------------|----------------------------|
| F3   | CCA AAC CCG TCA ATC AAG TC    | TGT ATA AAT TAA GTC CTT GCC AAA AA | 54.5                       |
| TFPI | TGA AAG TCT GGA AGA GTG CAA A | GCT GGA GTG AGA CAC CAT GA         | 54.5                       |
| FGA  | CAT CAA TCT GCC TGC AAA GA    | TCT GCA GAA GCT GGA TAT GCT        | 53.5                       |
| FGG  | TGC TAC CAG AGA CAA CTG CTG   | TTC AAA GTA GCA GCG TCT ATC A      | 53                         |
| LDHA | GAC CTA CGT GGC TTG GAA GA    | AAT CTC CAT GTT CCC CAA GG         | 53                         |

**Supplementary Table 13 – Primer sequences and annealing temperatures for RT-PCR of coagulation factors.** All reactions comprised 35 cycles of PCR.



| Amplicon | Primer sequence (sense) | Primer sequence (antisense) | Annealing temperature (°C) |
|----------|-------------------------|-----------------------------|----------------------------|
| DIS3 RNB | CCTCTTCTGGCTGATTCTTGA   | TGCAGGAAAAAGAAATGTGG        | 55                         |
| DIS3 RNB | CAAAGCCGATGAACAATGA     | GCCGAATCTCCTACTTTTCCA       | 56                         |
| FAM46C   | TTGAGTCCTCATGGCAACAC    | CGTACATGCTCTCCCAATC         | 56                         |
| FAM46C   | TGAAGGACATCGTCCAGACC    | AGACACACGGTGCTCTCGTT        | 56                         |
| FAM46C   | TGAAGGAGGCATATGTGCAG    | TTTCCAACGTGGCACTGTAA        | 56                         |
| FAM46C   | CCCACAGACCAGGAAGAAAT    | CAGCACAACTTTCATGTAAGTGC     | 56                         |

**Supplementary Table 14 – Primer sequences and annealing temperatures for PCR of DIS3 (RNB domain) and FAM46C.** All reactions comprised 35 cycles of PCR.

| Cell line | DNA change | Protein change | Del 13q21 at other allele? |
|-----------|------------|----------------|----------------------------|
| H929      | c.G1570C   | p.A524P        | Yes                        |
| INA6      | None       |                |                            |
| JIM3      | None       |                |                            |
| KMS11     | None       |                |                            |
| KMS12-BM  | None       |                |                            |
| KMS12-PE  | None       |                |                            |
| L363      | None       |                |                            |
| MM.1S     | None       |                |                            |
| OCI-My5   | None       |                |                            |
| OCI-My7   | None       |                |                            |
| OPM2      | None       |                |                            |
| RPMI8226  | None       |                |                            |
| SKMM1     | c.A2533G   | p.I845V        | Yes                        |
| U266      | None       |                |                            |
| XG6       | None       |                |                            |

**Supplementary Table 15 – *DIS3* RNB domain mutations in cell lines.** PCR and Sanger sequencing was used to detect mutations in the cell lines shown.

| Cell line | DNA change        | Protein change | Del 1p12 at other allele? |
|-----------|-------------------|----------------|---------------------------|
| H929      | c.278_279insC     | p.L93fsX15     | Yes                       |
| INA6      | None              |                |                           |
| JIM3      | None              |                |                           |
| KMS11     | None              |                |                           |
| KMS12-BM  | None              |                |                           |
| KMS12-PE  | None              |                |                           |
| L363      | None              |                |                           |
| LP1       | Hom. del. exon 1* |                |                           |
| MM.1S     | c.A808G           | p.M270V        | Yes                       |
| OCI-My1   | None              |                |                           |
| OCI-My5   | None              |                |                           |
| OCI-My7   | None              |                |                           |
| OPM2      | c.A533C           | p.E178A        | Yes                       |
| RPMI8226  | None              |                |                           |
| SKMM1     | c.519delT         | p.I173fsX36    | No                        |
| U266      | None              |                |                           |
| XG6       | None              |                |                           |

\*Determined by aCGH

**Supplementary Table 16 – *FAM46C* mutations in cell lines.** PCR and Sanger sequencing was used to detect mutations in 16 of the cell lines shown. In addition, aCGH profiles of cell lines were examined for larger re-arrangements and the homozygous deletion in LP1 was identified (*FAM46C* expression is zero in this cell line).
